# Supplementary material for: Enhancer RNA AL928768.3 from the IGH Locus Regulates MYC Expression and Controls the Proliferation and Chemoresistance of Burkitt Lymphoma Cells with IGH/MYC Translocation
Source: MDPI journal article supplement (doi:10.3390/ijms23094624), 2022-04-21

**Table S1.** Schematic illustration of the regions, alignment reads and genome repeats. The illustration shows alignment of Raji cell line RNA-Seq reads (SRX1981036) from Sequence Read Archive Nucleotide BLAST (NSBI). The positions of genome repeats were obtained from UCSC Genome Browser on Human (hg38) Assembly. The three areas that were selected are highlighted in green.

| # | Coordinates of region (hg 38) | Alignment of reads and repeats position                                   |
|---|-------------------------------|---------------------------------------------------------------------------|
| 1 | 11:68378000-68384000          | <div> <div> <div>SINE</div> <div>SINE</div> <div>SINE</div> </div> </div> |
| 2 | 11:68576671-68582671          | <div> <div>LINE</div> <div>LINE</div> <div>SINE</div> </div>              |



|   |                        |                                                                                                               |
|---|------------------------|---------------------------------------------------------------------------------------------------------------|
| 5 | 14:105058665-105064665 | <p>SINE SINE</p> 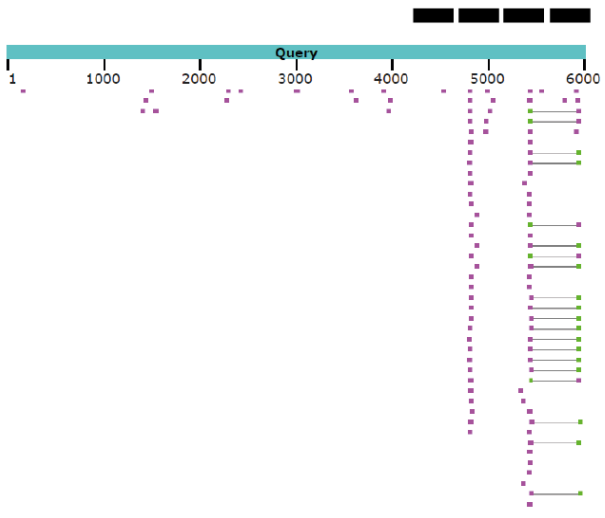           |
| 6 | 14:105069641-105075641 | <p>SINE LINE</p>           |
| 7 | 14:105555400-105563600 | <p>LTR SINE LTR SINE</p>  |

|    |                        |                                                                                                                        |
|----|------------------------|------------------------------------------------------------------------------------------------------------------------|
| 8  | 14:105579331-105585331 | <p>no repeats</p> 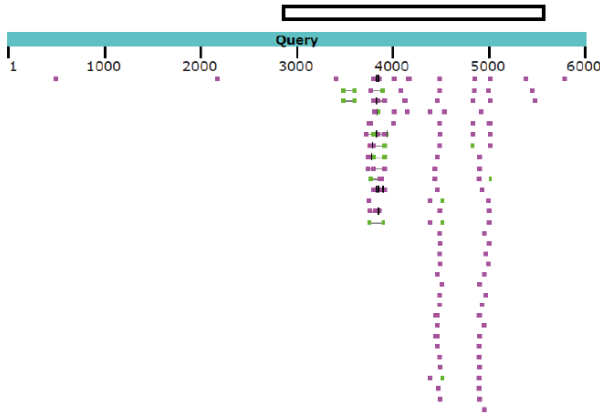                   |
| 9  | 14:105628900-105634900 | <p>no repeats      LTR DNA LTR</p>  |
| 10 | 14:105674707-105683021 | <p>LTR    SINE LTR    SINE</p>     |

|    |                        |                                            |
|----|------------------------|--------------------------------------------|
| 11 | 14:105744600-105750600 | <p>no repeats      no repeats      LTR</p> |
| 12 | 14:106398526-106404526 | <p>SINE      LTR      SINE</p>             |
| 13 | 14:67458397-67464397   | <p>SINE      SINE      SINE</p>            |

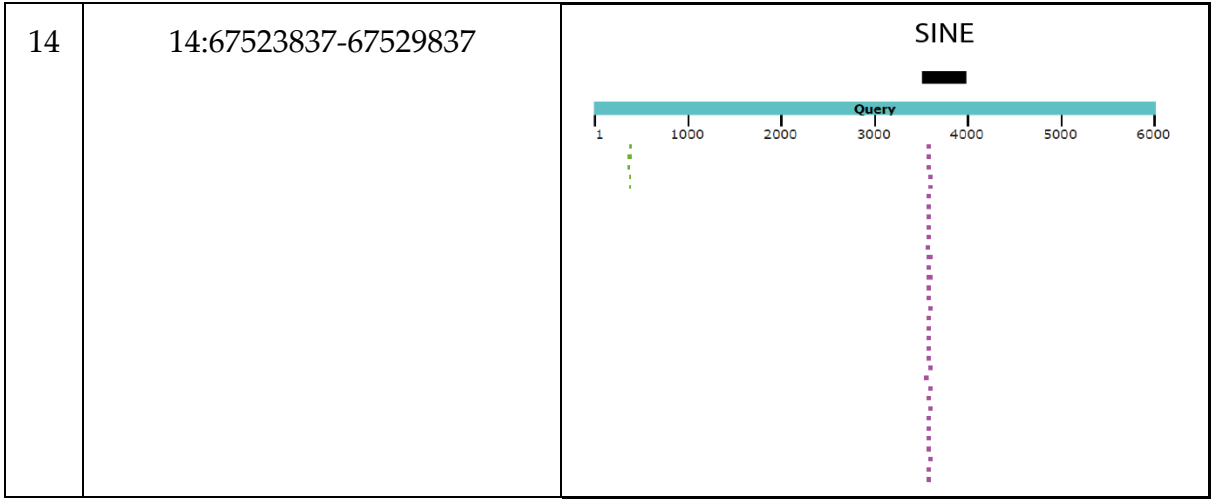

Supplement: s1 [file s1]
