# Supplementary material for: Enhancer RNA AL928768.3 from the IGH Locus Regulates MYC Expression and Controls the Proliferation and Chemoresistance of Burkitt Lymphoma Cells with IGH/MYC Translocation
Source: Int J Mol Sci. 2022 Apr 21;23(9):4624. doi: 10.3390/ijms23094624 (PMC9103539; doi:10.3390/ijms23094624)
Supplement: Supplementary file 1 [file ijms-23-04624-s001.zip › Table S2.xlsx]

## Sheet: Annotation
MyList	Gene ID	Type	Tax ID	Homologene Gene ID	Homologene Gene Tax ID	Gene Symbol	Description	Biological Process (GO)	Kinase Class (UniProt)	Protein Function (Protein Atlas)	Subcellular Location (Protein Atlas)	Drug (DrugBank)	Canonical Pathways_x000D_	Hallmark Gene Sets_x000D_	GO:0002250 adaptive immune response	GO:0050853 B cell receptor signaling path	GO:0034660 ncRNA metabolic process	R-HSA-8953854 Metabolism of RNA	hsa05340 Primary immunodeficiency	hsa03410 Base excision repair	GO:0030888 regulation of B cell prolifera	GO:0106074 aminoacyl-tRNA metabolism invo	GO:0006259 DNA metabolic process	GO:0006520 cellular amino acid metabolic	GO:0009451 RNA modification	GO:0006304 DNA modification	GO:0033632 regulation of cell-cell adhesi	WP69 T-cell receptor (TCR) signalin	GO:0055086 nucleobase-containing small mo	GO:0097205 renal filtration	R-HSA-162587 HIV Life Cycle	WP4950 16p11.2 distal deletion syndro	GO:0006448 regulation of translational el	GO:0033674 positive regulation of kinase
ENSG00000240505.8	23495	ensembl_gene_id	H. sapiens	23495	H. sapiens	TNFRSF13B	TNF receptor superfamily member 13B	GO:0030889 negative regulation of B cell proliferation;GO:0001782 B cell homeostasis;GO:0050869 negative regulation of B cell activation		Human disease related genes:Immune system diseases:Primary immunodeficiency; Predicted intracellular proteins; CD markers; Disease related genes			(M165)PID SYNDECAN 4 PATHWAY; (M240)PID SYNDECAN 2 PATHWAY		1.0	1.0	0.0	0.0	1.0	0.0	1.0	0.0	0.0	0.0	0.0	0.0	0.0	0.0	0.0	0.0	0.0	0.0	0.0	0.0
ENSG00000011590.13	27033	ensembl_gene_id	H. sapiens	27033	H. sapiens	ZBTB32	zinc finger and BTB domain containing 32	GO:0000122 negative regulation of transcription by RNA polymerase II;GO:0045892 negative regulation of transcription, DNA-templated;GO:1903507 negative regulation of nucleic acid-templated transcription		Predicted intracellular proteins; Transcription factors:Zinc-coordinating DNA-binding domains					0.0	0.0	0.0	0.0	0.0	0.0	0.0	0.0	0.0	0.0	0.0	0.0	0.0	0.0	0.0	0.0	0.0	0.0	0.0	0.0
ENSG00000128438.10						None	None	None	None	None	None	None	None	None	nan	nan	nan	nan	nan	nan	nan	nan	nan	nan	nan	nan	nan	nan	nan	nan	nan	nan	nan	nan
ENSG00000240041.1	28477	ensembl_gene_id	H. sapiens	28477	H. sapiens	IGHJ4	immunoglobulin heavy joining 4			Predicted intracellular proteins					0.0	0.0	0.0	0.0	0.0	0.0	0.0	0.0	0.0	0.0	0.0	0.0	0.0	0.0	0.0	0.0	0.0	0.0	0.0	0.0
ENSG00000110777.11	5450	ensembl_gene_id	H. sapiens	5450	H. sapiens	POU2AF1	POU class 2 homeobox associating factor 1	GO:0002314 germinal center B cell differentiation;GO:0002313 mature B cell differentiation involved in immune response;GO:0002335 mature B cell differentiation		Predicted intracellular proteins; Cancer-related genes:Mutated cancer genes; Disease related genes					0.0	1.0	0.0	0.0	1.0	0.0	0.0	0.0	0.0	0.0	0.0	0.0	0.0	0.0	0.0	0.0	0.0	0.0	0.0	0.0
ENSG00000241351.3	28914	ensembl_gene_id	H. sapiens	28914	H. sapiens	IGKV3-11	immunoglobulin kappa variable 3-11			Predicted secreted proteins					0.0	0.0	0.0	0.0	0.0	0.0	0.0	0.0	0.0	0.0	0.0	0.0	0.0	0.0	0.0	0.0	0.0	0.0	0.0	0.0
ENSG00000242887.1	28479	ensembl_gene_id	H. sapiens	28479	H. sapiens	IGHJ3	immunoglobulin heavy joining 3			Predicted intracellular proteins					0.0	0.0	0.0	0.0	0.0	0.0	0.0	0.0	0.0	0.0	0.0	0.0	0.0	0.0	0.0	0.0	0.0	0.0	0.0	0.0
ENSG00000211904.2	28481	ensembl_gene_id	H. sapiens	28481	H. sapiens	IGHJ2	immunoglobulin heavy joining 2			Predicted intracellular proteins					0.0	0.0	0.0	0.0	0.0	0.0	0.0	0.0	0.0	0.0	0.0	0.0	0.0	0.0	0.0	0.0	0.0	0.0	0.0	0.0
ENSG00000242472.1	28476	ensembl_gene_id	H. sapiens	28476	H. sapiens	IGHJ5	immunoglobulin heavy joining 5			Predicted intracellular proteins					0.0	0.0	0.0	0.0	0.0	0.0	0.0	0.0	0.0	0.0	0.0	0.0	0.0	0.0	0.0	0.0	0.0	0.0	0.0	0.0
ENSG00000211899.9	3507	ensembl_gene_id	H. sapiens	3507	H. sapiens	IGHM	immunoglobulin heavy constant mu	GO:0019731 antibacterial humoral response;GO:0050829 defense response to Gram-negative bacterium;GO:0006910 phagocytosis, recognition		Predicted secreted proteins; Predicted intracellular proteins; Disease related genes					1.0	1.0	0.0	0.0	0.0	0.0	0.0	0.0	0.0	0.0	0.0	0.0	0.0	0.0	0.0	0.0	0.0	0.0	0.0	0.0
ENSG00000211895.4	3493	ensembl_gene_id	H. sapiens	3493	H. sapiens	IGHA1	immunoglobulin heavy constant alpha 1	GO:0060267 positive regulation of respiratory burst;GO:0018298 protein-chromophore linkage;GO:0003094 glomerular filtration		Predicted secreted proteins; Predicted intracellular proteins; Disease related genes			(M2)PID SMAD2 3NUCLEAR PATHWAY		1.0	1.0	0.0	0.0	0.0	0.0	0.0	0.0	0.0	0.0	0.0	0.0	0.0	0.0	0.0	1.0	0.0	0.0	0.0	0.0
ENSG00000211900.2	28475	ensembl_gene_id	H. sapiens	28475	H. sapiens	IGHJ6	immunoglobulin heavy joining 6			Predicted intracellular proteins					0.0	0.0	0.0	0.0	0.0	0.0	0.0	0.0	0.0	0.0	0.0	0.0	0.0	0.0	0.0	0.0	0.0	0.0	0.0	0.0
ENSG00000211941.3	28450	ensembl_gene_id	H. sapiens	28450	H. sapiens	IGHV3-11	immunoglobulin heavy variable 3-11	GO:0006910 phagocytosis, recognition;GO:0006958 complement activation, classical pathway;GO:0002455 humoral immune response mediated by circulating immunoglobulin		Predicted secreted proteins					1.0	1.0	0.0	0.0	0.0	0.0	0.0	0.0	0.0	0.0	0.0	0.0	0.0	0.0	0.0	0.0	0.0	0.0	0.0	0.0
ENSG00000211956.2	28395	ensembl_gene_id	H. sapiens	28395	H. sapiens	IGHV4-34	immunoglobulin heavy variable 4-34	GO:0006910 phagocytosis, recognition;GO:0006958 complement activation, classical pathway;GO:0002455 humoral immune response mediated by circulating immunoglobulin		Predicted secreted proteins					1.0	1.0	0.0	0.0	0.0	0.0	0.0	0.0	0.0	0.0	0.0	0.0	0.0	0.0	0.0	0.0	0.0	0.0	0.0	0.0
ENSG00000211966.2	28388	ensembl_gene_id	H. sapiens	28388	H. sapiens	IGHV5-51	immunoglobulin heavy variable 5-51	GO:0006910 phagocytosis, recognition;GO:0006958 complement activation, classical pathway;GO:0002455 humoral immune response mediated by circulating immunoglobulin		Predicted secreted proteins					1.0	1.0	0.0	0.0	0.0	0.0	0.0	0.0	0.0	0.0	0.0	0.0	0.0	0.0	0.0	0.0	0.0	0.0	0.0	0.0
ENSG00000211945.2	28468	ensembl_gene_id	H. sapiens	28468	H. sapiens	IGHV1-18	immunoglobulin heavy variable 1-18	GO:0006910 phagocytosis, recognition;GO:0006958 complement activation, classical pathway;GO:0002455 humoral immune response mediated by circulating immunoglobulin		Predicted secreted proteins					1.0	1.0	0.0	0.0	0.0	0.0	0.0	0.0	0.0	0.0	0.0	0.0	0.0	0.0	0.0	0.0	0.0	0.0	0.0	0.0
ENSG00000211947.2	28444	ensembl_gene_id	H. sapiens	28444	H. sapiens	IGHV3-21	immunoglobulin heavy variable 3-21	GO:0006910 phagocytosis, recognition;GO:0006958 complement activation, classical pathway;GO:0002455 humoral immune response mediated by circulating immunoglobulin		Predicted secreted proteins					1.0	1.0	0.0	0.0	0.0	0.0	0.0	0.0	0.0	0.0	0.0	0.0	0.0	0.0	0.0	0.0	0.0	0.0	0.0	0.0
ENSG00000211949.3	28442	ensembl_gene_id	H. sapiens	28442	H. sapiens	IGHV3-23	immunoglobulin heavy variable 3-23	GO:0006910 phagocytosis, recognition;GO:0006958 complement activation, classical pathway;GO:0002455 humoral immune response mediated by circulating immunoglobulin		Predicted secreted proteins					1.0	1.0	0.0	0.0	0.0	0.0	0.0	0.0	0.0	0.0	0.0	0.0	0.0	0.0	0.0	0.0	0.0	0.0	0.0	0.0
ENSG00000239951.1	28912	ensembl_gene_id	H. sapiens	28912	H. sapiens	IGKV3-20	immunoglobulin kappa variable 3-20	GO:0003094 glomerular filtration;GO:0097205 renal filtration;GO:0019731 antibacterial humoral response		Predicted secreted proteins					1.0	1.0	0.0	0.0	0.0	0.0	0.0	0.0	0.0	0.0	0.0	0.0	0.0	0.0	0.0	1.0	0.0	0.0	0.0	0.0
ENSG00000211597.2	28950	ensembl_gene_id	H. sapiens	28950	H. sapiens	IGKJ1	immunoglobulin kappa joining 1	GO:0002250 adaptive immune response;GO:0006955 immune response;GO:0002376 immune system process		Predicted secreted proteins; Predicted intracellular proteins					1.0	0.0	0.0	0.0	0.0	0.0	0.0	0.0	0.0	0.0	0.0	0.0	0.0	0.0	0.0	0.0	0.0	0.0	0.0	0.0
ENSG00000211592.8	3514	ensembl_gene_id	H. sapiens	3514	H. sapiens	IGKC	immunoglobulin kappa constant	GO:0001895 retina homeostasis;GO:0006910 phagocytosis, recognition;GO:0006958 complement activation, classical pathway		Predicted secreted proteins; Predicted intracellular proteins					1.0	1.0	0.0	0.0	0.0	0.0	0.0	0.0	0.0	0.0	0.0	0.0	0.0	0.0	0.0	1.0	0.0	0.0	0.0	0.0
ENSG00000123989.13	79586	ensembl_gene_id	H. sapiens	79586	H. sapiens	CHPF	chondroitin polymerizing factor	GO:0030206 chondroitin sulfate biosynthetic process;GO:0050650 chondroitin sulfate proteoglycan biosynthetic process;GO:0030204 chondroitin sulfate metabolic process		Enzymes; Predicted intracellular proteins; ENZYME proteins:Transferases	Cytosol (Supported); Additional: Centrosome;Vesicles			(M5937)HALLMARK GLYCOLYSIS	0.0	0.0	0.0	0.0	0.0	0.0	0.0	0.0	0.0	0.0	0.0	0.0	0.0	0.0	0.0	0.0	0.0	0.0	0.0	0.0
ENSG00000211595.2	28948	ensembl_gene_id	H. sapiens	28948	H. sapiens	IGKJ3	immunoglobulin kappa joining 3			Predicted intracellular proteins					0.0	0.0	0.0	0.0	0.0	0.0	0.0	0.0	0.0	0.0	0.0	0.0	0.0	0.0	0.0	0.0	0.0	0.0	0.0	0.0
ENSG00000211653.2	28825	ensembl_gene_id	H. sapiens	28825	H. sapiens	IGLV1-40	immunoglobulin lambda variable 1-40	GO:0002377 immunoglobulin production;GO:0002440 production of molecular mediator of immune response;GO:0002250 adaptive immune response		Predicted secreted proteins					1.0	0.0	0.0	0.0	0.0	0.0	0.0	0.0	0.0	0.0	0.0	0.0	0.0	0.0	0.0	0.0	0.0	0.0	0.0	0.0
ENSG00000211943.2	28448	ensembl_gene_id	H. sapiens	28448	H. sapiens	IGHV3-15	immunoglobulin heavy variable 3-15	GO:0006910 phagocytosis, recognition;GO:0006958 complement activation, classical pathway;GO:0002455 humoral immune response mediated by circulating immunoglobulin		Predicted secreted proteins					1.0	1.0	0.0	0.0	0.0	0.0	0.0	0.0	0.0	0.0	0.0	0.0	0.0	0.0	0.0	0.0	0.0	0.0	0.0	0.0
ENSG00000211594.2	28947	ensembl_gene_id	H. sapiens	28947	H. sapiens	IGKJ4	immunoglobulin kappa joining 4			Predicted intracellular proteins					0.0	0.0	0.0	0.0	0.0	0.0	0.0	0.0	0.0	0.0	0.0	0.0	0.0	0.0	0.0	0.0	0.0	0.0	0.0	0.0
ENSG00000211598.2	28908	ensembl_gene_id	H. sapiens	28908	H. sapiens	IGKV4-1	immunoglobulin kappa variable 4-1	GO:0002377 immunoglobulin production;GO:0002440 production of molecular mediator of immune response;GO:0002250 adaptive immune response		Predicted secreted proteins					1.0	0.0	0.0	0.0	0.0	0.0	0.0	0.0	0.0	0.0	0.0	0.0	0.0	0.0	0.0	0.0	0.0	0.0	0.0	0.0
ENSG00000211967.3	28420	ensembl_gene_id	H. sapiens	28420	H. sapiens	IGHV3-53	immunoglobulin heavy variable 3-53	GO:0006910 phagocytosis, recognition;GO:0006958 complement activation, classical pathway;GO:0002455 humoral immune response mediated by circulating immunoglobulin		Predicted secreted proteins					1.0	1.0	0.0	0.0	0.0	0.0	0.0	0.0	0.0	0.0	0.0	0.0	0.0	0.0	0.0	0.0	0.0	0.0	0.0	0.0
ENSG00000211677.2	3538	ensembl_gene_id	H. sapiens	3538	H. sapiens	IGLC2	immunoglobulin lambda constant 2	GO:0006910 phagocytosis, recognition;GO:0006958 complement activation, classical pathway;GO:0002455 humoral immune response mediated by circulating immunoglobulin		Predicted secreted proteins; Predicted intracellular proteins					1.0	1.0	0.0	0.0	0.0	0.0	0.0	0.0	0.0	0.0	0.0	0.0	0.0	0.0	0.0	0.0	0.0	0.0	0.0	0.0
ENSG00000244437.1	28913	ensembl_gene_id	H. sapiens	28913	H. sapiens	IGKV3-15	immunoglobulin kappa variable 3-15	GO:0002377 immunoglobulin production;GO:0002440 production of molecular mediator of immune response;GO:0002250 adaptive immune response		Predicted secreted proteins					1.0	0.0	0.0	0.0	0.0	0.0	0.0	0.0	0.0	0.0	0.0	0.0	0.0	0.0	0.0	0.0	0.0	0.0	0.0	0.0
ENSG00000211593.2	28946	ensembl_gene_id	H. sapiens	28946	H. sapiens	IGKJ5	immunoglobulin kappa joining 5			Predicted intracellular proteins					0.0	0.0	0.0	0.0	0.0	0.0	0.0	0.0	0.0	0.0	0.0	0.0	0.0	0.0	0.0	0.0	0.0	0.0	0.0	0.0
ENSG00000125726.10	970	ensembl_gene_id	H. sapiens	970	H. sapiens	CD70	CD70 molecule	GO:0002456 T cell mediated immunity;GO:0042100 B cell proliferation;GO:0033209 tumor necrosis factor-mediated signaling pathway		Cancer-related genes:Mutated cancer genes; CD markers; Cancer-related genes:Candidate cancer biomarkers; Disease related genes; Predicted intracellular proteins	Nucleoplasm (Uncertain)			(M5932)HALLMARK INFLAMMATORY RESPONSE	1.0	1.0	0.0	0.0	1.0	0.0	1.0	0.0	0.0	0.0	0.0	0.0	0.0	0.0	0.0	0.0	0.0	0.0	0.0	0.0
ENSG00000174996.11	64837	ensembl_gene_id	H. sapiens	64837	H. sapiens	KLC2	kinesin light chain 2	GO:0032418 lysosome localization;GO:1990849 vacuolar localization;GO:0051640 organelle localization		Human disease related genes:Nervous system diseases:Eye disease; Predicted intracellular proteins; Disease related genes	Cytosol;Plasma membrane (Supported); Additional: Mitochondria;Nucleoplasm				0.0	0.0	0.0	0.0	0.0	0.0	0.0	0.0	0.0	0.0	0.0	0.0	0.0	0.0	0.0	0.0	0.0	0.0	0.0	0.0
ENSG00000211962.2	28465	ensembl_gene_id	H. sapiens	28465	H. sapiens	IGHV1-46	immunoglobulin heavy variable 1-46			Predicted secreted proteins					0.0	0.0	0.0	0.0	0.0	0.0	0.0	0.0	0.0	0.0	0.0	0.0	0.0	0.0	0.0	0.0	0.0	0.0	0.0	0.0
ENSG00000224373.3	28392	ensembl_gene_id	H. sapiens	28392	H. sapiens	IGHV4-59	immunoglobulin heavy variable 4-59	GO:0006910 phagocytosis, recognition;GO:0006958 complement activation, classical pathway;GO:0002455 humoral immune response mediated by circulating immunoglobulin		Predicted secreted proteins					1.0	1.0	0.0	0.0	0.0	0.0	0.0	0.0	0.0	0.0	0.0	0.0	0.0	0.0	0.0	0.0	0.0	0.0	0.0	0.0
ENSG00000211596.3	28949	ensembl_gene_id	H. sapiens	28949	H. sapiens	IGKJ2	immunoglobulin kappa joining 2			Predicted intracellular proteins					0.0	0.0	0.0	0.0	0.0	0.0	0.0	0.0	0.0	0.0	0.0	0.0	0.0	0.0	0.0	0.0	0.0	0.0	0.0	0.0
ENSG00000211937.3	28457	ensembl_gene_id	H. sapiens	28457	H. sapiens	IGHV2-5	immunoglobulin heavy variable 2-5	GO:0006910 phagocytosis, recognition;GO:0006958 complement activation, classical pathway;GO:0002455 humoral immune response mediated by circulating immunoglobulin		Predicted secreted proteins					1.0	1.0	0.0	0.0	0.0	0.0	0.0	0.0	0.0	0.0	0.0	0.0	0.0	0.0	0.0	0.0	0.0	0.0	0.0	0.0
ENSG00000243290.3	28940	ensembl_gene_id	H. sapiens	28940	H. sapiens	IGKV1-12	immunoglobulin kappa variable 1-12	GO:0002377 immunoglobulin production;GO:0002440 production of molecular mediator of immune response;GO:0002250 adaptive immune response		Predicted secreted proteins					1.0	0.0	0.0	0.0	0.0	0.0	0.0	0.0	0.0	0.0	0.0	0.0	0.0	0.0	0.0	0.0	0.0	0.0	0.0	0.0
ENSG00000173715.15	79703	ensembl_gene_id	H. sapiens	79703	H. sapiens	C11orf80	chromosome 11 open reading frame 80	GO:0042138 meiotic DNA double-strand break formation;GO:0007131 reciprocal meiotic recombination;GO:0140527 reciprocal homologous recombination		Predicted intracellular proteins; Disease related genes; Human disease related genes:Reproductive system diseases:Reproductive system diseases	Centrosome (Approved)				0.0	0.0	0.0	0.0	0.0	0.0	0.0	0.0	1.0	0.0	0.0	0.0	0.0	0.0	0.0	0.0	0.0	0.0	0.0	0.0
ENSG00000211955.2	28434	ensembl_gene_id	H. sapiens	28434	H. sapiens	IGHV3-33	immunoglobulin heavy variable 3-33	GO:0006910 phagocytosis, recognition;GO:0006958 complement activation, classical pathway;GO:0002455 humoral immune response mediated by circulating immunoglobulin		Predicted secreted proteins					1.0	1.0	0.0	0.0	0.0	0.0	0.0	0.0	0.0	0.0	0.0	0.0	0.0	0.0	0.0	0.0	0.0	0.0	0.0	0.0
ENSG00000270550.1	28439	ensembl_gene_id	H. sapiens	28439	H. sapiens	IGHV3-30	immunoglobulin heavy variable 3-30	GO:0006910 phagocytosis, recognition;GO:0006958 complement activation, classical pathway;GO:0002455 humoral immune response mediated by circulating immunoglobulin		Predicted secreted proteins					1.0	1.0	0.0	0.0	0.0	0.0	0.0	0.0	0.0	0.0	0.0	0.0	0.0	0.0	0.0	0.0	0.0	0.0	0.0	0.0
ENSG00000211673.2						None	None	None	None	None	None	None	None	None	nan	nan	nan	nan	nan	nan	nan	nan	nan	nan	nan	nan	nan	nan	nan	nan	nan	nan	nan	nan
ENSG00000134285.10	51303	ensembl_gene_id	H. sapiens	51303	H. sapiens	FKBP11	FKBP prolyl isomerase 11	GO:0000413 protein peptidyl-prolyl isomerization;GO:0018208 peptidyl-proline modification;GO:0061077 chaperone-mediated protein folding		Enzymes; ENZYME proteins:Isomerase; Predicted intracellular proteins	Centrosome (Approved)				0.0	0.0	0.0	0.0	0.0	0.0	0.0	0.0	0.0	0.0	0.0	0.0	0.0	0.0	0.0	0.0	0.0	0.0	0.0	0.0
ENSG00000211965.4	28423	ensembl_gene_id	H. sapiens	28423	H. sapiens	IGHV3-49	immunoglobulin heavy variable 3-49	GO:0006910 phagocytosis, recognition;GO:0006958 complement activation, classical pathway;GO:0002455 humoral immune response mediated by circulating immunoglobulin		Predicted secreted proteins					1.0	1.0	0.0	0.0	0.0	0.0	0.0	0.0	0.0	0.0	0.0	0.0	0.0	0.0	0.0	0.0	0.0	0.0	0.0	0.0
ENSG00000243063.1	28915	ensembl_gene_id	H. sapiens	28915	H. sapiens	IGKV3-7	immunoglobulin kappa variable 3-7 (non-functional)	GO:0002377 immunoglobulin production;GO:0002440 production of molecular mediator of immune response;GO:0002250 adaptive immune response		Predicted secreted proteins					1.0	0.0	0.0	0.0	0.0	0.0	0.0	0.0	0.0	0.0	0.0	0.0	0.0	0.0	0.0	0.0	0.0	0.0	0.0	0.0
ENSG00000243466.1	28299	ensembl_gene_id	H. sapiens	28299	H. sapiens	IGKV1-5	immunoglobulin kappa variable 1-5	GO:0002377 immunoglobulin production;GO:0002440 production of molecular mediator of immune response;GO:0002250 adaptive immune response		Predicted secreted proteins					1.0	0.0	0.0	0.0	0.0	0.0	0.0	0.0	0.0	0.0	0.0	0.0	0.0	0.0	0.0	0.0	0.0	0.0	0.0	0.0
ENSG00000244575.3	28935	ensembl_gene_id	H. sapiens	28935	H. sapiens	IGKV1-27	immunoglobulin kappa variable 1-27	GO:0002377 immunoglobulin production;GO:0002440 production of molecular mediator of immune response;GO:0002250 adaptive immune response		Predicted secreted proteins					1.0	0.0	0.0	0.0	0.0	0.0	0.0	0.0	0.0	0.0	0.0	0.0	0.0	0.0	0.0	0.0	0.0	0.0	0.0	0.0
ENSG00000211644.3	28820	ensembl_gene_id	H. sapiens	28820	H. sapiens	IGLV1-51	immunoglobulin lambda variable 1-51	GO:0002377 immunoglobulin production;GO:0002440 production of molecular mediator of immune response;GO:0002250 adaptive immune response		Predicted secreted proteins					1.0	0.0	0.0	0.0	0.0	0.0	0.0	0.0	0.0	0.0	0.0	0.0	0.0	0.0	0.0	0.0	0.0	0.0	0.0	0.0
ENSG00000211666.2	28815	ensembl_gene_id	H. sapiens	28815	H. sapiens	IGLV2-14	immunoglobulin lambda variable 2-14	GO:0002377 immunoglobulin production;GO:0002440 production of molecular mediator of immune response;GO:0002250 adaptive immune response		Predicted secreted proteins					1.0	0.0	0.0	0.0	0.0	0.0	0.0	0.0	0.0	0.0	0.0	0.0	0.0	0.0	0.0	0.0	0.0	0.0	0.0	0.0
ENSG00000211648.2	28822	ensembl_gene_id	H. sapiens	28822	H. sapiens	IGLV1-47	immunoglobulin lambda variable 1-47	GO:0002377 immunoglobulin production;GO:0002440 production of molecular mediator of immune response;GO:0002250 adaptive immune response		Predicted secreted proteins					1.0	0.0	0.0	0.0	0.0	0.0	0.0	0.0	0.0	0.0	0.0	0.0	0.0	0.0	0.0	0.0	0.0	0.0	0.0	0.0
ENSG00000211637.2	28784	ensembl_gene_id	H. sapiens	28784	H. sapiens	IGLV4-69	immunoglobulin lambda variable 4-69	GO:0002377 immunoglobulin production;GO:0002440 production of molecular mediator of immune response;GO:0002250 adaptive immune response		Predicted secreted proteins					1.0	0.0	0.0	0.0	0.0	0.0	0.0	0.0	0.0	0.0	0.0	0.0	0.0	0.0	0.0	0.0	0.0	0.0	0.0	0.0
ENSG00000104814.12	11184	ensembl_gene_id	H. sapiens	11184	H. sapiens	MAP4K1	mitogen-activated protein kinase kinase kinase kinase 1	GO:1904627 response to phorbol 13-acetate 12-myristate;GO:1904628 cellular response to phorbol 13-acetate 12-myristate;GO:0007254 JNK cascade	STE Ser/Thr protein kinase family	Enzymes; Kinases:STE Ser/Thr protein kinases; Predicted intracellular proteins; ENZYME proteins:Transferases	Plasma membrane (Approved)	Fostamatinib	(M190)PID TCR JNK PATHWAY; (M1718)SIG IL4RECEPTOR IN B LYPHOCYTES; (M8626)SIG BCR SIGNALING PATHWAY	(M5950)HALLMARK ALLOGRAFT REJECTION; (M5953)HALLMARK KRAS SIGNALING UP	0.0	0.0	0.0	0.0	1.0	0.0	0.0	0.0	0.0	0.0	0.0	0.0	0.0	1.0	0.0	0.0	0.0	0.0	0.0	0.0
ENSG00000144645.13	114884	ensembl_gene_id	H. sapiens	114884	H. sapiens	OSBPL10	oxysterol binding protein like 10	GO:0036150 phosphatidylserine acyl-chain remodeling;GO:0006658 phosphatidylserine metabolic process;GO:0015918 sterol transport		Predicted intracellular proteins	Cytosol;Golgi apparatus;Plasma membrane (Approved)				0.0	0.0	0.0	0.0	0.0	0.0	0.0	0.0	0.0	0.0	0.0	0.0	0.0	0.0	0.0	0.0	0.0	0.0	0.0	0.0
ENSG00000211675.2	3537	ensembl_gene_id	H. sapiens	3537	H. sapiens	IGLC1	immunoglobulin lambda constant 1	GO:0006910 phagocytosis, recognition;GO:0006958 complement activation, classical pathway;GO:0002455 humoral immune response mediated by circulating immunoglobulin		Predicted secreted proteins; Predicted intracellular proteins					1.0	1.0	0.0	0.0	0.0	0.0	0.0	0.0	0.0	0.0	0.0	0.0	0.0	0.0	0.0	0.0	0.0	0.0	0.0	0.0
ENSG00000242371.1	28930	ensembl_gene_id	H. sapiens	28930	H. sapiens	IGKV1-39	immunoglobulin kappa variable 1-39	GO:0002377 immunoglobulin production;GO:0002440 production of molecular mediator of immune response;GO:0002250 adaptive immune response		Predicted secreted proteins					1.0	0.0	0.0	0.0	0.0	0.0	0.0	0.0	0.0	0.0	0.0	0.0	0.0	0.0	0.0	0.0	0.0	0.0	0.0	0.0
ENSG00000123352.17	65244	ensembl_gene_id	H. sapiens	65244	H. sapiens	SPATS2	spermatogenesis associated serine rich 2			Predicted intracellular proteins	Cytosol (Enhanced)				0.0	0.0	0.0	0.0	0.0	0.0	0.0	0.0	0.0	0.0	0.0	0.0	0.0	0.0	0.0	0.0	0.0	0.0	0.0	0.0
ENSG00000211663.2	28797	ensembl_gene_id	H. sapiens	28797	H. sapiens	IGLV3-19	immunoglobulin lambda variable 3-19	GO:0002377 immunoglobulin production;GO:0002440 production of molecular mediator of immune response;GO:0002250 adaptive immune response		Predicted secreted proteins					1.0	0.0	0.0	0.0	0.0	0.0	0.0	0.0	0.0	0.0	0.0	0.0	0.0	0.0	0.0	0.0	0.0	0.0	0.0	0.0
ENSG00000211660.3	28813	ensembl_gene_id	H. sapiens	28813	H. sapiens	IGLV2-23	immunoglobulin lambda variable 2-23	GO:0002377 immunoglobulin production;GO:0002440 production of molecular mediator of immune response;GO:0002250 adaptive immune response		Predicted secreted proteins					1.0	0.0	0.0	0.0	0.0	0.0	0.0	0.0	0.0	0.0	0.0	0.0	0.0	0.0	0.0	0.0	0.0	0.0	0.0	0.0
ENSG00000211668.2	28816	ensembl_gene_id	H. sapiens	28816	H. sapiens	IGLV2-11	immunoglobulin lambda variable 2-11	GO:0002377 immunoglobulin production;GO:0002440 production of molecular mediator of immune response;GO:0002250 adaptive immune response		Predicted secreted proteins					1.0	0.0	0.0	0.0	0.0	0.0	0.0	0.0	0.0	0.0	0.0	0.0	0.0	0.0	0.0	0.0	0.0	0.0	0.0	0.0
ENSG00000135916.15	81618	ensembl_gene_id	H. sapiens	81618	H. sapiens	ITM2C	integral membrane protein 2C	GO:0042985 negative regulation of amyloid precursor protein biosynthetic process;GO:0010561 negative regulation of glycoprotein biosynthetic process;GO:0042984 regulation of amyloid precursor protein biosynthetic process		Predicted intracellular proteins					0.0	0.0	0.0	0.0	0.0	0.0	0.0	0.0	0.0	0.0	0.0	0.0	0.0	0.0	0.0	0.0	0.0	0.0	0.0	0.0
ENSG00000170456.15	160518	ensembl_gene_id	H. sapiens	160518	H. sapiens	DENND5B	DENN domain containing 5B	GO:1901508 positive regulation of acylglycerol transport;GO:1905885 positive regulation of triglyceride transport;GO:1901506 regulation of acylglycerol transport		Predicted intracellular proteins	Microtubules (Approved); Additional: Nucleoli				0.0	0.0	0.0	0.0	0.0	0.0	0.0	0.0	0.0	0.0	0.0	0.0	0.0	0.0	0.0	0.0	0.0	0.0	0.0	0.0
ENSG00000177455.12	930	ensembl_gene_id	H. sapiens	930	H. sapiens	CD19	CD19 molecule	GO:0001923 B-1 B cell differentiation;GO:0002322 B cell proliferation involved in immune response;GO:0050855 regulation of B cell receptor signaling pathway		Human disease related genes:Immune system diseases:Primary immunodeficiency; FDA approved drug targets:Biotech drugs; CD markers; Disease related genes		Coltuximab ravtansine; Blinatumomab; Inebilizumab; Tisagenlecleucel; Axicabtagene ciloleucel	(M1315)SIG PIP3 SIGNALING IN B LYMPHOCYTES; (M8626)SIG BCR SIGNALING PATHWAY; (M10)PID BCR 5PATHWAY		1.0	1.0	0.0	0.0	1.0	0.0	1.0	0.0	0.0	0.0	0.0	0.0	0.0	0.0	0.0	0.0	0.0	1.0	0.0	1.0
ENSG00000159753.13	146206	ensembl_gene_id	H. sapiens	146206	H. sapiens	CARMIL2	capping protein regulator and myosin 1 linker 2	GO:2000813 negative regulation of barbed-end actin filament capping;GO:2000812 regulation of barbed-end actin filament capping;GO:0090091 positive regulation of extracellular matrix disassembly		Predicted intracellular proteins; Disease related genes					0.0	0.0	0.0	0.0	0.0	0.0	0.0	0.0	0.0	0.0	0.0	0.0	0.0	0.0	0.0	0.0	0.0	0.0	0.0	0.0
ENSG00000141858.11	90378	ensembl_gene_id	H. sapiens	90378	H. sapiens	SAMD1	sterile alpha motif domain containing 1	GO:0034439 lipoprotein lipid oxidation;GO:0042160 lipoprotein modification;GO:0042161 lipoprotein oxidation		Predicted intracellular proteins	Cytosol (Approved); Additional: Mitochondria				0.0	0.0	0.0	0.0	0.0	0.0	0.0	0.0	0.0	0.0	0.0	0.0	0.0	0.0	0.0	0.0	0.0	0.0	0.0	0.0
ENSG00000168005.8	144097	ensembl_gene_id	H. sapiens	144097	H. sapiens	SPINDOC	spindlin interactor and repressor of chromatin binding	GO:0045892 negative regulation of transcription, DNA-templated;GO:1903507 negative regulation of nucleic acid-templated transcription;GO:1902679 negative regulation of RNA biosynthetic process		Predicted intracellular proteins	Nuclear speckles (Approved)				0.0	0.0	0.0	0.0	0.0	0.0	0.0	0.0	0.0	0.0	0.0	0.0	0.0	0.0	0.0	0.0	0.0	0.0	0.0	0.0
ENSG00000244116.3	28921	ensembl_gene_id	H. sapiens	28921	H. sapiens	IGKV2-28	immunoglobulin kappa variable 2-28	GO:0002377 immunoglobulin production;GO:0002440 production of molecular mediator of immune response;GO:0002250 adaptive immune response		Predicted secreted proteins					1.0	0.0	0.0	0.0	0.0	0.0	0.0	0.0	0.0	0.0	0.0	0.0	0.0	0.0	0.0	0.0	0.0	0.0	0.0	0.0
ENSG00000090861.15	16	ensembl_gene_id	H. sapiens	16	H. sapiens	AARS1	alanyl-tRNA synthetase 1	GO:0140018 regulation of cytoplasmic translational fidelity;GO:0006419 alanyl-tRNA aminoacylation;GO:1900247 regulation of cytoplasmic translational elongation		ENZYME proteins:Ligase; Human disease related genes:Nervous system diseases:Epilepsy; Predicted intracellular proteins; Disease related genes; Potential drug targets; Enzymes; Human disease related genes:Nervous system diseases:Neurodegenerative diseases	Cytosol (Supported)	Alanine		(M5950)HALLMARK ALLOGRAFT REJECTION	0.0	0.0	1.0	1.0	0.0	0.0	0.0	1.0	0.0	1.0	1.0	0.0	0.0	0.0	0.0	0.0	0.0	0.0	1.0	0.0
ENSG00000198720.12	124930	ensembl_gene_id	H. sapiens	124930	H. sapiens	ANKRD13B	ankyrin repeat domain 13B	GO:0002091 negative regulation of receptor internalization;GO:0048261 negative regulation of receptor-mediated endocytosis;GO:0045806 negative regulation of endocytosis		Predicted intracellular proteins	Vesicles (Supported)				0.0	0.0	0.0	0.0	0.0	0.0	0.0	0.0	0.0	0.0	0.0	0.0	0.0	0.0	0.0	0.0	0.0	0.0	0.0	0.0
ENSG00000067057.16	5214	ensembl_gene_id	H. sapiens	5214	H. sapiens	PFKP	phosphofructokinase, platelet	GO:0030388 fructose 1,6-bisphosphate metabolic process;GO:0006735 NADH regeneration;GO:0061621 canonical glycolysis		Enzymes; Predicted intracellular proteins; ENZYME proteins:Transferases	Cytosol (Supported)			(M5938)HALLMARK REACTIVE OXYGEN SPECIES PATHWAY; (M5891)HALLMARK HYPOXIA; (M5913)HALLMARK INTERFERON GAMMA RESPONSE	0.0	0.0	0.0	0.0	0.0	0.0	0.0	0.0	0.0	0.0	0.0	0.0	0.0	0.0	1.0	0.0	0.0	0.0	0.0	0.0
ENSG00000211651.3	28823	ensembl_gene_id	H. sapiens	28823	H. sapiens	IGLV1-44	immunoglobulin lambda variable 1-44	GO:0002377 immunoglobulin production;GO:0002440 production of molecular mediator of immune response;GO:0002250 adaptive immune response		Predicted secreted proteins					1.0	0.0	0.0	0.0	0.0	0.0	0.0	0.0	0.0	0.0	0.0	0.0	0.0	0.0	0.0	0.0	0.0	0.0	0.0	0.0
ENSG00000143297.18	83416	ensembl_gene_id	H. sapiens	83416	H. sapiens	FCRL5	Fc receptor like 5	GO:0007166 cell surface receptor signaling pathway;GO:0007165 signal transduction;GO:0023052 signaling		Predicted secreted proteins; CD markers; Disease related genes					0.0	0.0	0.0	0.0	0.0	0.0	0.0	0.0	0.0	0.0	0.0	0.0	0.0	0.0	0.0	0.0	0.0	0.0	0.0	0.0
ENSG00000101194.17	63910	ensembl_gene_id	H. sapiens	63910	H. sapiens	SLC17A9	solute carrier family 17 member 9	GO:1904669 ATP export;GO:1903790 guanine nucleotide transmembrane transport;GO:0001408 guanine nucleotide transport		Human disease related genes:Congenital malformations:Congenital malformations of skin; Transporters:Electrochemical Potential-driven transporters; Disease related genes; Potential drug targets	Nucleoplasm (Approved)				0.0	0.0	0.0	0.0	0.0	0.0	0.0	0.0	0.0	0.0	0.0	0.0	0.0	0.0	0.0	0.0	0.0	0.0	0.0	0.0
ENSG00000211964.3	28424	ensembl_gene_id	H. sapiens	28424	H. sapiens	IGHV3-48	immunoglobulin heavy variable 3-48	GO:0006910 phagocytosis, recognition;GO:0006958 complement activation, classical pathway;GO:0002455 humoral immune response mediated by circulating immunoglobulin		Predicted secreted proteins					1.0	1.0	0.0	0.0	0.0	0.0	0.0	0.0	0.0	0.0	0.0	0.0	0.0	0.0	0.0	0.0	0.0	0.0	0.0	0.0
ENSG00000170476.15	51237	ensembl_gene_id	H. sapiens	51237	H. sapiens	MZB1	marginal zone B and B1 cell specific protein	GO:0033622 integrin activation;GO:0002639 positive regulation of immunoglobulin production;GO:0030888 regulation of B cell proliferation		Predicted secreted proteins	Golgi apparatus (Approved)				0.0	1.0	0.0	0.0	0.0	0.0	1.0	0.0	0.0	0.0	0.0	0.0	0.0	0.0	0.0	0.0	0.0	0.0	0.0	0.0
ENSG00000211905.1	28483	ensembl_gene_id	H. sapiens	28483	H. sapiens	IGHJ1	immunoglobulin heavy joining 1	GO:0002250 adaptive immune response;GO:0006955 immune response;GO:0002376 immune system process		Predicted secreted proteins; Predicted intracellular proteins					1.0	0.0	0.0	0.0	0.0	0.0	0.0	0.0	0.0	0.0	0.0	0.0	0.0	0.0	0.0	0.0	0.0	0.0	0.0	0.0
ENSG00000211938.2	28452	ensembl_gene_id	H. sapiens	28452	H. sapiens	IGHV3-7	immunoglobulin heavy variable 3-7	GO:0006910 phagocytosis, recognition;GO:0006958 complement activation, classical pathway;GO:0002455 humoral immune response mediated by circulating immunoglobulin		Predicted secreted proteins					1.0	1.0	0.0	0.0	0.0	0.0	0.0	0.0	0.0	0.0	0.0	0.0	0.0	0.0	0.0	0.0	0.0	0.0	0.0	0.0
ENSG00000162729.13	93185	ensembl_gene_id	H. sapiens	93185	H. sapiens	IGSF8	immunoglobulin superfamily member 8	GO:0007519 skeletal muscle tissue development;GO:0060538 skeletal muscle organ development;GO:0007338 single fertilization		Predicted intracellular proteins; CD markers	Vesicles (Supported)		(M277)PID INTEGRIN A4B1 PATHWAY; (M18)PID INTEGRIN1 PATHWAY		0.0	0.0	0.0	0.0	0.0	0.0	0.0	0.0	0.0	0.0	0.0	0.0	0.0	0.0	0.0	0.0	0.0	0.0	0.0	0.0
ENSG00000167861.15	283987	ensembl_gene_id	H. sapiens	283987	H. sapiens	HID1	HID1 domain containing			Predicted intracellular proteins	Cytosol;Golgi apparatus (Supported)				0.0	0.0	0.0	0.0	0.0	0.0	0.0	0.0	0.0	0.0	0.0	0.0	0.0	0.0	0.0	0.0	0.0	0.0	0.0	0.0
ENSG00000160949.16	4796	ensembl_gene_id	H. sapiens	4796	H. sapiens	TONSL	tonsoku like, DNA repair protein	GO:0031297 replication fork processing;GO:0045005 DNA-dependent DNA replication maintenance of fidelity;GO:0000724 double-strand break repair via homologous recombination		Human disease related genes:Congenital malformations:Congenital malformations of the musculoskeletal system; Transcription factors:Immunoglobulin fold; Predicted intracellular proteins; Disease related genes	Nucleoplasm (Supported); Additional: Nuclear bodies		(M12705)SIG CD40PATHWAYMAP		0.0	0.0	0.0	0.0	0.0	1.0	0.0	0.0	1.0	0.0	0.0	0.0	0.0	0.0	0.0	0.0	0.0	0.0	0.0	0.0
ENSG00000106628.10	5425	ensembl_gene_id	H. sapiens	5425	H. sapiens	POLD2	DNA polymerase delta 2, accessory subunit	GO:0042276 error-prone translesion synthesis;GO:0006271 DNA strand elongation involved in DNA replication;GO:0022616 DNA strand elongation		Predicted intracellular proteins	Nucleoplasm (Enhanced)			(M5925)HALLMARK E2F TARGETS; (M5926)HALLMARK MYC TARGETS V1	0.0	0.0	0.0	0.0	0.0	1.0	0.0	0.0	1.0	0.0	0.0	0.0	0.0	0.0	0.0	0.0	0.0	0.0	0.0	0.0
ENSG00000284048.1						None	None	None	None	None	None	None	None	None	nan	nan	nan	nan	nan	nan	nan	nan	nan	nan	nan	nan	nan	nan	nan	nan	nan	nan	nan	nan
ENSG00000167748.10	3816	ensembl_gene_id	H. sapiens	3816	H. sapiens	KLK1	kallikrein 1	GO:0031638 zymogen activation;GO:0003073 regulation of systemic arterial blood pressure;GO:0016485 protein processing		Enzymes; ENZYME proteins:Hydrolases; Predicted secreted proteins; Peptidases:Serine-type peptidases		Aluminium; Benzamidine; Lanoteplase; Aprotinin; Aniline; Nafamostat; Aluminium phosphate; Aluminum acetate		(M5921)HALLMARK COMPLEMENT	0.0	0.0	0.0	0.0	0.0	0.0	0.0	0.0	0.0	0.0	0.0	0.0	0.0	0.0	0.0	0.0	0.0	0.0	0.0	0.0
ENSG00000167775.10	51293	ensembl_gene_id	H. sapiens	51293	H. sapiens	CD320	CD320 molecule	GO:0031296 B cell costimulation;GO:0015889 cobalamin transport;GO:0030656 regulation of vitamin metabolic process		CD markers; Disease related genes	Cytosol (Approved)				0.0	1.0	0.0	0.0	0.0	0.0	1.0	0.0	0.0	0.0	0.0	0.0	0.0	0.0	0.0	0.0	0.0	0.0	0.0	0.0
ENSG00000079263.18	11262	ensembl_gene_id	H. sapiens	11262	H. sapiens	SP140	SP140 nuclear body protein	GO:0006952 defense response;GO:0006357 regulation of transcription by RNA polymerase II;GO:0006950 response to stress		Transcription factors:alpha-Helices exposed by beta-structures; Predicted intracellular proteins	Nucleoli fibrillar center (Approved); Additional: Mitochondria				0.0	0.0	0.0	0.0	0.0	0.0	0.0	0.0	0.0	0.0	0.0	0.0	0.0	0.0	0.0	0.0	0.0	0.0	0.0	0.0
ENSG00000100401.19	5905	ensembl_gene_id	H. sapiens	5905	H. sapiens	RANGAP1	Ran GTPase activating protein 1	GO:1904116 response to vasopressin;GO:1904117 cellular response to vasopressin;GO:0046826 negative regulation of protein export from nucleus		Transporters:Transporter channels and pores; Predicted intracellular proteins	Nuclear membrane (Enhanced); Additional: Cytosol;Vesicles		(M140)PID RANBP2 PATHWAY; (M30)PID HDAC CLASSII PATHWAY; (M101)PID HDAC CLASSI PATHWAY		0.0	0.0	0.0	0.0	0.0	0.0	0.0	0.0	0.0	0.0	0.0	0.0	0.0	0.0	0.0	0.0	1.0	0.0	0.0	0.0
ENSG00000064545.14	54929	ensembl_gene_id	H. sapiens	54929	H. sapiens	TMEM161A	transmembrane protein 161A	GO:1902230 negative regulation of intrinsic apoptotic signaling pathway in response to DNA damage;GO:1902229 regulation of intrinsic apoptotic signaling pathway in response to DNA damage;GO:2001021 negative regulation of response to DNA damage stimulus			Cytosol (Approved)				0.0	0.0	0.0	0.0	0.0	0.0	0.0	0.0	1.0	0.0	0.0	0.0	0.0	0.0	0.0	0.0	0.0	0.0	0.0	1.0
ENSG00000242076.2	28933	ensembl_gene_id	H. sapiens	28933	H. sapiens	IGKV1-33	immunoglobulin kappa variable 1-33			Predicted secreted proteins; Predicted intracellular proteins					0.0	0.0	0.0	0.0	0.0	0.0	0.0	0.0	0.0	0.0	0.0	0.0	0.0	0.0	0.0	0.0	0.0	0.0	0.0	0.0
ENSG00000141456.14	27043	ensembl_gene_id	H. sapiens	27043	H. sapiens	PELP1	proline, glutamate and leucine rich protein 1	GO:0071391 cellular response to estrogen stimulus;GO:0043627 response to estrogen;GO:0032870 cellular response to hormone stimulus		Predicted intracellular proteins	Nucleoli;Nucleoplasm (Enhanced)		(M213)PID AR NONGENOMIC PATHWAY; (M41)PID ER NONGENOMIC PATHWAY; (M58)PID AR PATHWAY		0.0	0.0	0.0	1.0	0.0	0.0	0.0	0.0	0.0	0.0	0.0	0.0	0.0	0.0	0.0	0.0	0.0	0.0	0.0	0.0
ENSG00000125648.14	79085	ensembl_gene_id	H. sapiens	79085	H. sapiens	SLC25A23	solute carrier family 25 member 23	GO:0097274 urea homeostasis;GO:1900069 regulation of cellular hyperosmotic salinity response;GO:1901000 regulation of response to salt stress		Transporters:Electrochemical Potential-driven transporters; Predicted intracellular proteins	Mitochondria (Supported)			(M5956)HALLMARK KRAS SIGNALING DN	0.0	0.0	0.0	0.0	0.0	0.0	0.0	0.0	0.0	0.0	0.0	0.0	0.0	0.0	0.0	0.0	0.0	0.0	0.0	1.0
ENSG00000163703.17	78987	ensembl_gene_id	H. sapiens	78987	H. sapiens	CRELD1	cysteine rich with EGF like domains 1	GO:0003197 endocardial cushion development;GO:0003279 cardiac septum development;GO:0003205 cardiac chamber development		Human disease related genes:Congenital malformations:Congenital malformations of the circulatory system; Disease related genes; Potential drug targets; Enzymes; ENZYME proteins:Isomerase; Predicted intracellular proteins	Cytosol (Approved); Additional: Nucleoli		(M3008)NABA ECM GLYCOPROTEINS; (M5884)NABA CORE MATRISOME; (M5889)NABA MATRISOME		0.0	0.0	0.0	0.0	0.0	0.0	0.0	0.0	0.0	0.0	0.0	0.0	0.0	0.0	0.0	0.0	0.0	0.0	0.0	0.0
ENSG00000211897.8	3502	ensembl_gene_id	H. sapiens	3502	H. sapiens	IGHG3	immunoglobulin heavy constant gamma 3 (G3m marker)	GO:0001895 retina homeostasis;GO:0006910 phagocytosis, recognition;GO:0006958 complement activation, classical pathway		Predicted secreted proteins; Predicted intracellular proteins			(M28)PID IL4 2PATHWAY		1.0	1.0	0.0	0.0	0.0	0.0	0.0	0.0	0.0	0.0	0.0	0.0	0.0	0.0	0.0	1.0	0.0	0.0	0.0	0.0
ENSG00000243156.7	57553	ensembl_gene_id	H. sapiens	57553	H. sapiens	MICAL3	microtubule associated monooxygenase, calponin and LIM domain containing 3	GO:0030042 actin filament depolymerization;GO:0051261 protein depolymerization;GO:0043624 cellular protein complex disassembly		Enzymes; Predicted intracellular proteins; ENZYME proteins:Oxidoreductases	Midbody ring;Nucleoplasm (Supported); Additional: Cytosol;Plasma membrane				0.0	0.0	0.0	0.0	0.0	0.0	0.0	0.0	0.0	0.0	0.0	0.0	0.0	0.0	0.0	0.0	0.0	0.0	0.0	0.0
ENSG00000137411.16	57176	ensembl_gene_id	H. sapiens	57176	H. sapiens	VARS2	valyl-tRNA synthetase 2, mitochondrial	GO:0006438 valyl-tRNA aminoacylation;GO:0106074 aminoacyl-tRNA metabolism involved in translational fidelity;GO:0006450 regulation of translational fidelity		ENZYME proteins:Ligase; Disease related genes; Potential drug targets; Enzymes; Predicted intracellular proteins; Human disease related genes:Congenital disorders of metabolism:Mitochondrial diseases	Mitochondria (Approved)				0.0	0.0	1.0	1.0	0.0	0.0	0.0	1.0	0.0	1.0	0.0	0.0	0.0	0.0	0.0	0.0	0.0	0.0	0.0	0.0
ENSG00000211976.2	28409	ensembl_gene_id	H. sapiens	28409	H. sapiens	IGHV3-73	immunoglobulin heavy variable 3-73	GO:0006910 phagocytosis, recognition;GO:0006958 complement activation, classical pathway;GO:0002455 humoral immune response mediated by circulating immunoglobulin		Predicted secreted proteins					1.0	1.0	0.0	0.0	0.0	0.0	0.0	0.0	0.0	0.0	0.0	0.0	0.0	0.0	0.0	0.0	0.0	0.0	0.0	0.0
ENSG00000127191.17	7186	ensembl_gene_id	H. sapiens	7186	H. sapiens	TRAF2	TNF receptor associated factor 2	GO:1903721 positive regulation of I-kappaB phosphorylation;GO:1903719 regulation of I-kappaB phosphorylation;GO:0034351 negative regulation of glial cell apoptotic process		Enzymes; Predicted intracellular proteins; ENZYME proteins:Transferases; Cancer-related genes:Candidate cancer biomarkers	Cytosol (Enhanced)		(M20)PID P38 MKK3 6PATHWAY; (M79)PID TRAIL PATHWAY; (M45)PID CD40 PATHWAY	(M5923)HALLMARK PI3K AKT MTOR SIGNALING; (M5950)HALLMARK ALLOGRAFT REJECTION	0.0	1.0	0.0	0.0	0.0	0.0	0.0	0.0	0.0	0.0	0.0	0.0	0.0	1.0	0.0	0.0	0.0	1.0	0.0	1.0
ENSG00000167543.15	90313	ensembl_gene_id	H. sapiens	90313	H. sapiens	TP53I13	tumor protein p53 inducible protein 13	GO:0009411 response to UV;GO:0009416 response to light stimulus;GO:0045786 negative regulation of cell cycle		Predicted intracellular proteins					0.0	0.0	0.0	0.0	0.0	0.0	0.0	0.0	0.0	0.0	0.0	0.0	0.0	0.0	0.0	0.0	0.0	0.0	0.0	0.0
ENSG00000211942.3	28449	ensembl_gene_id	H. sapiens	28449	H. sapiens	IGHV3-13	immunoglobulin heavy variable 3-13	GO:0006910 phagocytosis, recognition;GO:0006958 complement activation, classical pathway;GO:0002455 humoral immune response mediated by circulating immunoglobulin		Predicted secreted proteins					1.0	1.0	0.0	0.0	0.0	0.0	0.0	0.0	0.0	0.0	0.0	0.0	0.0	0.0	0.0	0.0	0.0	0.0	0.0	0.0
ENSG00000211670.2	28804	ensembl_gene_id	H. sapiens	28804	H. sapiens	IGLV3-9	immunoglobulin lambda variable 3-9	GO:0002377 immunoglobulin production;GO:0002440 production of molecular mediator of immune response;GO:0002250 adaptive immune response		Predicted secreted proteins					1.0	0.0	0.0	0.0	0.0	0.0	0.0	0.0	0.0	0.0	0.0	0.0	0.0	0.0	0.0	0.0	0.0	0.0	0.0	0.0
ENSG00000081052.11	1286	ensembl_gene_id	H. sapiens	1286	H. sapiens	COL4A4	collagen type IV alpha 4 chain	GO:0032836 glomerular basement membrane development;GO:0032835 glomerulus development;GO:0072006 nephron development		Cancer-related genes:Candidate cancer biomarkers; Predicted secreted proteins; Human disease related genes:Congenital malformations:Other congenital malformations; Disease related genes; Human disease related genes:Urinary system diseases:Kidney diseases		TRC093	(M5887)NABA BASEMENT MEMBRANES; (M53)PID INTEGRIN3 PATHWAY; (M3005)NABA COLLAGENS		0.0	0.0	0.0	1.0	0.0	0.0	0.0	0.0	0.0	0.0	0.0	0.0	0.0	0.0	0.0	0.0	0.0	0.0	0.0	0.0
ENSG00000211659.2	28793	ensembl_gene_id	H. sapiens	28793	H. sapiens	IGLV3-25	immunoglobulin lambda variable 3-25	GO:0002377 immunoglobulin production;GO:0002440 production of molecular mediator of immune response;GO:0002250 adaptive immune response		Predicted secreted proteins					1.0	0.0	0.0	0.0	0.0	0.0	0.0	0.0	0.0	0.0	0.0	0.0	0.0	0.0	0.0	0.0	0.0	0.0	0.0	0.0
ENSG00000122224.17	4063	ensembl_gene_id	H. sapiens	4063	H. sapiens	LY9	lymphocyte antigen 9	GO:0072540 T-helper 17 cell lineage commitment;GO:0072539 T-helper 17 cell differentiation;GO:0002295 T-helper cell lineage commitment		Predicted intracellular proteins; CD markers	Plasma membrane (Approved); Additional: Centriolar satellite				1.0	1.0	0.0	0.0	1.0	0.0	0.0	0.0	0.0	0.0	0.0	0.0	0.0	1.0	0.0	0.0	0.0	0.0	0.0	0.0
ENSG00000173511.9	7423	ensembl_gene_id	H. sapiens	7423	H. sapiens	VEGFB	vascular endothelial growth factor B	GO:0060754 positive regulation of mast cell chemotaxis;GO:0060753 regulation of mast cell chemotaxis;GO:0050930 induction of positive chemotaxis		Cancer-related genes:Candidate cancer biomarkers; Predicted secreted proteins; FDA approved drug targets:Biotech drugs; RAS pathway related proteins; Predicted intracellular proteins		Aflibercept	(M137)PID VEGF VEGFR PATHWAY; (M226)PID VEGFR1 PATHWAY; (M5883)NABA SECRETED FACTORS	(M5905)HALLMARK ADIPOGENESIS	0.0	0.0	0.0	0.0	0.0	0.0	0.0	0.0	0.0	0.0	0.0	0.0	0.0	0.0	0.0	0.0	0.0	0.0	0.0	1.0
ENSG00000204371.11	10919	ensembl_gene_id	H. sapiens	10919	H. sapiens	EHMT2	euchromatic histone lysine methyltransferase 2	GO:0010424 DNA methylation on cytosine within a CG sequence;GO:0060992 response to fungicide;GO:0036166 phenotypic switching		Predicted intracellular proteins	Nuclear speckles (Supported); Additional: Nucleoplasm		(M151)PID AR TF PATHWAY		0.0	0.0	0.0	1.0	0.0	0.0	0.0	0.0	1.0	0.0	1.0	1.0	0.0	0.0	0.0	0.0	0.0	0.0	0.0	0.0
ENSG00000095585.16	29760	ensembl_gene_id	H. sapiens	29760	H. sapiens	BLNK	B cell linker	GO:0050853 B cell receptor signaling pathway;GO:0030183 B cell differentiation;GO:0042113 B cell activation		Human disease related genes:Immune system diseases:Primary immunodeficiency; Predicted intracellular proteins; Disease related genes	Plasma membrane (Supported); Additional: Vesicles		(M17200)SA B CELL RECEPTOR COMPLEXES; (M8626)SIG BCR SIGNALING PATHWAY; (M141)PID PI3KCI PATHWAY		0.0	1.0	0.0	0.0	1.0	0.0	0.0	0.0	0.0	0.0	0.0	0.0	0.0	1.0	0.0	0.0	0.0	0.0	0.0	0.0
ENSG00000211679.2	3539	ensembl_gene_id	H. sapiens	3539	H. sapiens	IGLC3	immunoglobulin lambda constant 3 (Kern-Oz+ marker)	GO:0006910 phagocytosis, recognition;GO:0006958 complement activation, classical pathway;GO:0002455 humoral immune response mediated by circulating immunoglobulin		Predicted secreted proteins; Predicted intracellular proteins					1.0	1.0	0.0	0.0	0.0	0.0	0.0	0.0	0.0	0.0	0.0	0.0	0.0	0.0	0.0	0.0	0.0	0.0	0.0	0.0
ENSG00000211632.4	28876	ensembl_gene_id	H. sapiens	28876	H. sapiens	IGKV3D-11	immunoglobulin kappa variable 3D-11	GO:0002377 immunoglobulin production;GO:0002440 production of molecular mediator of immune response;GO:0002250 adaptive immune response		Predicted secreted proteins					1.0	0.0	0.0	0.0	0.0	0.0	0.0	0.0	0.0	0.0	0.0	0.0	0.0	0.0	0.0	0.0	0.0	0.0	0.0	0.0
ENSG00000005448.16	84058	ensembl_gene_id	H. sapiens	84058	H. sapiens	WDR54	WD repeat domain 54	GO:0002091 negative regulation of receptor internalization;GO:0048261 negative regulation of receptor-mediated endocytosis;GO:0045806 negative regulation of endocytosis		Predicted intracellular proteins	Cytosol;Vesicles (Approved)				0.0	0.0	0.0	0.0	0.0	0.0	0.0	0.0	0.0	0.0	0.0	0.0	0.0	0.0	0.0	0.0	0.0	0.0	0.0	0.0
ENSG00000005884.17	3675	ensembl_gene_id	H. sapiens	3675	H. sapiens	ITGA3	integrin subunit alpha 3	GO:0097062 dendritic spine maintenance;GO:0097205 renal filtration;GO:0035024 negative regulation of Rho protein signal transduction		CD markers; Cancer-related genes:Candidate cancer biomarkers; Human disease related genes:Congenital malformations:Other congenital malformations; Disease related genes; Predicted intracellular proteins	Plasma membrane (Supported)		(M47)PID INTEGRIN CS PATHWAY; (M69)PID REELIN PATHWAY; (M196)PID IL23 PATHWAY	(M5915)HALLMARK APICAL JUNCTION	0.0	0.0	0.0	0.0	0.0	0.0	0.0	0.0	0.0	0.0	0.0	0.0	0.0	0.0	0.0	1.0	0.0	0.0	0.0	0.0
ENSG00000172009.14	7064	ensembl_gene_id	H. sapiens	7064	H. sapiens	THOP1	thimet oligopeptidase 1	GO:0000209 protein polyubiquitination;GO:0006518 peptide metabolic process;GO:0016567 protein ubiquitination		Enzymes; ENZYME proteins:Hydrolases; Predicted intracellular proteins; Peptidases:Metallopeptidases	Cytosol (Supported)				0.0	0.0	0.0	1.0	0.0	0.0	0.0	0.0	0.0	0.0	0.0	0.0	0.0	0.0	0.0	0.0	0.0	0.0	0.0	0.0
ENSG00000211625.2	28874	ensembl_gene_id	H. sapiens	28874	H. sapiens	IGKV3D-20	immunoglobulin kappa variable 3D-20	GO:0002377 immunoglobulin production;GO:0002440 production of molecular mediator of immune response;GO:0002250 adaptive immune response		Predicted secreted proteins					1.0	0.0	0.0	0.0	0.0	0.0	0.0	0.0	0.0	0.0	0.0	0.0	0.0	0.0	0.0	0.0	0.0	0.0	0.0	0.0
ENSG00000234965.2	440829	ensembl_gene_id	H. sapiens	440829	H. sapiens	SHISA8	shisa family member 8	GO:0048172 regulation of short-term neuronal synaptic plasticity;GO:2000311 regulation of AMPA receptor activity;GO:0048168 regulation of neuronal synaptic plasticity		Transporters:Accessory Factors Involved in Transport					0.0	0.0	0.0	0.0	0.0	0.0	0.0	0.0	0.0	0.0	0.0	0.0	0.0	0.0	0.0	0.0	0.0	0.0	0.0	0.0
ENSG00000110660.14	54733	ensembl_gene_id	H. sapiens	54733	H. sapiens	SLC35F2	solute carrier family 35 member F2	GO:0055085 transmembrane transport;GO:0006810 transport;GO:0051234 establishment of localization		Transporters:Electrochemical Potential-driven transporters	Golgi apparatus (Approved)				0.0	0.0	0.0	0.0	0.0	0.0	0.0	0.0	0.0	0.0	0.0	0.0	0.0	0.0	0.0	0.0	0.0	0.0	0.0	0.0
ENSG00000162542.13	255104	ensembl_gene_id	H. sapiens	255104	H. sapiens	TMCO4	transmembrane and coiled-coil domains 4				Endoplasmic reticulum (Approved)				0.0	0.0	0.0	0.0	0.0	0.0	0.0	0.0	0.0	0.0	0.0	0.0	0.0	0.0	0.0	0.0	0.0	0.0	0.0	0.0
ENSG00000211959.2	28394	ensembl_gene_id	H. sapiens	28394	H. sapiens	IGHV4-39	immunoglobulin heavy variable 4-39	GO:0006910 phagocytosis, recognition;GO:0006958 complement activation, classical pathway;GO:0002455 humoral immune response mediated by circulating immunoglobulin		Predicted secreted proteins					1.0	1.0	0.0	0.0	0.0	0.0	0.0	0.0	0.0	0.0	0.0	0.0	0.0	0.0	0.0	0.0	0.0	0.0	0.0	0.0
ENSG00000213339.8	81890	ensembl_gene_id	H. sapiens	81890	H. sapiens	QTRT1	queuine tRNA-ribosyltransferase catalytic subunit 1	GO:0101030 tRNA-guanine transglycosylation;GO:0006400 tRNA modification;GO:0008033 tRNA processing		Enzymes; Predicted intracellular proteins; ENZYME proteins:Transferases	Mitochondria (Approved)				0.0	0.0	1.0	1.0	0.0	0.0	0.0	1.0	0.0	0.0	1.0	0.0	0.0	0.0	0.0	0.0	0.0	0.0	0.0	0.0
ENSG00000185163.9	317781	ensembl_gene_id	H. sapiens	317781	H. sapiens	DDX51	DEAD-box helicase 51	GO:0006364 rRNA processing;GO:0016072 rRNA metabolic process;GO:0042254 ribosome biogenesis		Enzymes; ENZYME proteins:Hydrolases; Predicted intracellular proteins	Nucleoli;Nucleoplasm (Approved); Additional: Cytosol				0.0	0.0	1.0	0.0	0.0	0.0	0.0	0.0	0.0	0.0	0.0	0.0	0.0	0.0	0.0	0.0	0.0	0.0	0.0	0.0
ENSG00000211950.2	28467	ensembl_gene_id	H. sapiens	28467	H. sapiens	IGHV1-24	immunoglobulin heavy variable 1-24	GO:0006910 phagocytosis, recognition;GO:0006958 complement activation, classical pathway;GO:0002455 humoral immune response mediated by circulating immunoglobulin		Predicted secreted proteins					1.0	1.0	0.0	0.0	0.0	0.0	0.0	0.0	0.0	0.0	0.0	0.0	0.0	0.0	0.0	0.0	0.0	0.0	0.0	0.0
ENSG00000059573.8	5832	ensembl_gene_id	H. sapiens	5832	H. sapiens	ALDH18A1	aldehyde dehydrogenase 18 family member A1	GO:0006592 ornithine biosynthetic process;GO:0019240 citrulline biosynthetic process;GO:0006561 proline biosynthetic process		ENZYME proteins:Oxidoreductases; Human disease related genes:Nervous system diseases:Other nervous and sensory system diseases; Human disease related genes:Congenital disorders of metabolism:Congenital disorders of amino acid metabolism; Human disease related genes:Congenital malformations:Congenital malformations of skin; Disease related genes; Potential drug targets; Enzymes; Predicted intracel…	Mitochondria (Enhanced)	Glutamic acid		(M5922)HALLMARK UNFOLDED PROTEIN RESPONSE	0.0	0.0	0.0	1.0	0.0	0.0	0.0	0.0	0.0	1.0	0.0	0.0	0.0	0.0	0.0	0.0	0.0	0.0	0.0	0.0
ENSG00000224650.2	28408	ensembl_gene_id	H. sapiens	28408	H. sapiens	IGHV3-74	immunoglobulin heavy variable 3-74	GO:0006910 phagocytosis, recognition;GO:0006958 complement activation, classical pathway;GO:0002455 humoral immune response mediated by circulating immunoglobulin		Predicted secreted proteins					1.0	1.0	0.0	0.0	0.0	0.0	0.0	0.0	0.0	0.0	0.0	0.0	0.0	0.0	0.0	0.0	0.0	0.0	0.0	0.0
ENSG00000109501.13	7466	ensembl_gene_id	H. sapiens	7466	H. sapiens	WFS1	wolframin ER transmembrane glycoprotein	GO:1903892 negative regulation of ATF6-mediated unfolded protein response;GO:1903891 regulation of ATF6-mediated unfolded protein response;GO:2000675 negative regulation of type B pancreatic cell apoptotic process		Human disease related genes:Nervous system diseases:Ear disease; Transporters:Accessory Factors Involved in Transport; Human disease related genes:Nervous system diseases:Eye disease; Disease related genes; Potential drug targets; Human disease related genes:Endocrine and metabolic diseases:Diabetes; Predicted intracellular proteins				(M5922)HALLMARK UNFOLDED PROTEIN RESPONSE; (M5906)HALLMARK ESTROGEN RESPONSE EARLY; (M5907)HALLMARK ESTROGEN RESPONSE LATE	0.0	0.0	0.0	1.0	0.0	0.0	0.0	0.0	0.0	0.0	0.0	0.0	0.0	0.0	0.0	1.0	0.0	0.0	0.0	1.0
ENSG00000278196.3	28817	ensembl_gene_id	H. sapiens	28817	H. sapiens	IGLV2-8	immunoglobulin lambda variable 2-8	GO:0002377 immunoglobulin production;GO:0002440 production of molecular mediator of immune response;GO:0002250 adaptive immune response		Predicted secreted proteins					1.0	0.0	0.0	0.0	0.0	0.0	0.0	0.0	0.0	0.0	0.0	0.0	0.0	0.0	0.0	0.0	0.0	0.0	0.0	0.0
ENSG00000176658.16	4642	ensembl_gene_id	H. sapiens	4642	H. sapiens	MYO1D	myosin ID	GO:0061502 early endosome to recycling endosome transport;GO:0030050 vesicle transport along actin filament;GO:0099515 actin filament-based transport		Predicted intracellular proteins	Cytosol (Approved)				0.0	0.0	0.0	0.0	0.0	0.0	0.0	0.0	0.0	0.0	0.0	0.0	0.0	0.0	0.0	0.0	0.0	0.0	0.0	0.0
ENSG00000142675.17	10256	ensembl_gene_id	H. sapiens	10256	H. sapiens	CNKSR1	connector enhancer of kinase suppressor of Ras 1	GO:0007266 Rho protein signal transduction;GO:0007265 Ras protein signal transduction;GO:0007264 small GTPase mediated signal transduction		Predicted intracellular proteins; Cancer-related genes:Mutated cancer genes	Cytosol (Approved)		(M182)PID IL3 PATHWAY		0.0	0.0	0.0	0.0	0.0	0.0	0.0	0.0	0.0	0.0	0.0	0.0	0.0	0.0	0.0	0.0	0.0	0.0	0.0	0.0
ENSG00000169116.11	25849	ensembl_gene_id	H. sapiens	25849	H. sapiens	PARM1	prostate androgen-regulated mucin-like protein 1	GO:0051973 positive regulation of telomerase activity;GO:0051972 regulation of telomerase activity;GO:2000573 positive regulation of DNA biosynthetic process			Cytosol;Nucleoplasm;Vesicles (Approved)		(M5880)NABA ECM AFFILIATED; (M5885)NABA MATRISOME ASSOCIATED; (M5889)NABA MATRISOME		0.0	0.0	0.0	0.0	0.0	0.0	0.0	0.0	1.0	0.0	0.0	0.0	0.0	0.0	0.0	0.0	0.0	0.0	0.0	1.0
ENSG00000240864.3	28938	ensembl_gene_id	H. sapiens	28938	H. sapiens	IGKV1-16	immunoglobulin kappa variable 1-16	GO:0002377 immunoglobulin production;GO:0002440 production of molecular mediator of immune response;GO:0002250 adaptive immune response		Predicted secreted proteins					1.0	0.0	0.0	0.0	0.0	0.0	0.0	0.0	0.0	0.0	0.0	0.0	0.0	0.0	0.0	0.0	0.0	0.0	0.0	0.0
ENSG00000254395.1	28393	ensembl_gene_id	H. sapiens	28393	H. sapiens	IGHV4-55	immunoglobulin heavy variable 4-55 (pseudogene)								0.0	0.0	0.0	0.0	0.0	0.0	0.0	0.0	0.0	0.0	0.0	0.0	0.0	0.0	0.0	0.0	0.0	0.0	0.0	0.0
ENSG00000117318.8	3399	ensembl_gene_id	H. sapiens	3399	H. sapiens	ID3	inhibitor of DNA binding 3, HLH protein	GO:0072750 cellular response to leptomycin B;GO:1901344 response to leptomycin B;GO:0030903 notochord development		Transcription factors:Basic domains; Predicted intracellular proteins; Cancer-related genes:Candidate cancer biomarkers	Nucleoplasm (Supported)			(M5896)HALLMARK TGF BETA SIGNALING	0.0	0.0	0.0	0.0	0.0	0.0	0.0	0.0	0.0	0.0	0.0	0.0	0.0	0.0	0.0	0.0	0.0	0.0	0.0	0.0
ENSG00000099821.13	5442	ensembl_gene_id	H. sapiens	5442	H. sapiens	POLRMT	RNA polymerase mitochondrial	GO:0006390 mitochondrial transcription;GO:0000959 mitochondrial RNA metabolic process;GO:0140053 mitochondrial gene expression		Enzymes; Predicted intracellular proteins; ENZYME proteins:Transferases	Mitochondria (Supported)				0.0	0.0	0.0	0.0	0.0	0.0	0.0	0.0	0.0	0.0	0.0	0.0	0.0	0.0	0.0	0.0	0.0	0.0	0.0	0.0
ENSG00000158863.21	64760	ensembl_gene_id	H. sapiens	64760	H. sapiens	FHIP2B	FHF complex subunit HOOK interacting protein 2B			Predicted intracellular proteins	Nucleoplasm (Approved); Additional: Cytosol				0.0	0.0	0.0	0.0	0.0	0.0	0.0	0.0	0.0	0.0	0.0	0.0	0.0	0.0	0.0	0.0	0.0	0.0	0.0	0.0
ENSG00000137265.14	3662	ensembl_gene_id	H. sapiens	3662	H. sapiens	IRF4	interferon regulatory factor 4	GO:0072540 T-helper 17 cell lineage commitment;GO:0072539 T-helper 17 cell differentiation;GO:0002295 T-helper cell lineage commitment		Transcription factors:Helix-turn-helix domains; Cancer-related genes:Mutated cancer genes; Cancer-related genes:Candidate cancer biomarkers; Disease related genes; Predicted intracellular proteins	Nucleoplasm (Supported); Additional: Cytosol		(M60)PID NFAT TFPATHWAY; (M28)PID IL4 2PATHWAY	(M5947)HALLMARK IL2 STAT5 SIGNALING; (M5913)HALLMARK INTERFERON GAMMA RESPONSE; (M5950)HALLMARK ALLOGRAFT REJECTION	1.0	1.0	0.0	0.0	1.0	0.0	1.0	0.0	0.0	0.0	0.0	0.0	0.0	1.0	0.0	0.0	0.0	0.0	0.0	0.0
ENSG00000111676.14	1822	ensembl_gene_id	H. sapiens	1822	H. sapiens	ATN1	atrophin 1	GO:0051402 neuron apoptotic process;GO:0070997 neuron death;GO:0006915 apoptotic process		Predicted intracellular proteins; Human disease related genes:Nervous system diseases:Neurodegenerative diseases; Disease related genes	Nucleoplasm (Enhanced)				0.0	0.0	0.0	0.0	0.0	0.0	0.0	0.0	0.0	0.0	0.0	0.0	0.0	0.0	0.0	0.0	0.0	0.0	0.0	0.0
ENSG00000167107.12	80221	ensembl_gene_id	H. sapiens	80221	H. sapiens	ACSF2	acyl-CoA synthetase family member 2	GO:0006637 acyl-CoA metabolic process;GO:0035383 thioester metabolic process;GO:0001676 long-chain fatty acid metabolic process		Enzymes; ENZYME proteins:Ligase; Predicted intracellular proteins	Cytosol;Microtubules;Nucleoplasm (Uncertain)				0.0	0.0	0.0	1.0	0.0	0.0	0.0	0.0	0.0	0.0	0.0	0.0	0.0	0.0	1.0	0.0	0.0	0.0	0.0	0.0
ENSG00000211599.2	28907	ensembl_gene_id	H. sapiens	28907	H. sapiens	IGKV5-2	immunoglobulin kappa variable 5-2	GO:0002377 immunoglobulin production;GO:0002440 production of molecular mediator of immune response;GO:0002250 adaptive immune response		Predicted secreted proteins					1.0	0.0	0.0	0.0	0.0	0.0	0.0	0.0	0.0	0.0	0.0	0.0	0.0	0.0	0.0	0.0	0.0	0.0	0.0	0.0
ENSG00000211662.2	28796	ensembl_gene_id	H. sapiens	28796	H. sapiens	IGLV3-21	immunoglobulin lambda variable 3-21	GO:0002377 immunoglobulin production;GO:0002440 production of molecular mediator of immune response;GO:0002250 adaptive immune response		Predicted secreted proteins					1.0	0.0	0.0	0.0	0.0	0.0	0.0	0.0	0.0	0.0	0.0	0.0	0.0	0.0	0.0	0.0	0.0	0.0	0.0	0.0
ENSG00000101224.17	994	ensembl_gene_id	H. sapiens	994	H. sapiens	CDC25B	cell division cycle 25B	GO:0110032 positive regulation of G2/MI transition of meiotic cell cycle;GO:0110030 regulation of G2/MI transition of meiotic cell cycle;GO:1901995 positive regulation of meiotic cell cycle phase transition		Enzymes; ENZYME proteins:Hydrolases; Predicted intracellular proteins; Cancer-related genes:Candidate cancer biomarkers	Vesicles (Uncertain); Additional: Mitotic spindle	L-cysteic acid	(M10154)SA G2 AND M PHASES; (M199)PID P38 MK2 PATHWAY; (M242)PID AURORA A PATHWAY	(M5902)HALLMARK APOPTOSIS; (M5901)HALLMARK G2M CHECKPOINT; (M5925)HALLMARK E2F TARGETS	0.0	0.0	0.0	0.0	0.0	0.0	0.0	0.0	0.0	0.0	0.0	0.0	0.0	0.0	0.0	0.0	0.0	0.0	0.0	1.0
ENSG00000243811.8	140564	ensembl_gene_id	H. sapiens	140564	H. sapiens	APOBEC3D	apolipoprotein B mRNA editing enzyme catalytic subunit 3D	GO:0070383 DNA cytosine deamination;GO:0006216 cytidine catabolic process;GO:0009972 cytidine deamination		Enzymes; ENZYME proteins:Hydrolases; Predicted intracellular proteins					0.0	1.0	0.0	0.0	0.0	0.0	0.0	0.0	1.0	0.0	1.0	1.0	0.0	0.0	1.0	0.0	0.0	0.0	0.0	0.0
ENSG00000239855.1	28943	ensembl_gene_id	H. sapiens	28943	H. sapiens	IGKV1-6	immunoglobulin kappa variable 1-6	GO:0002377 immunoglobulin production;GO:0002440 production of molecular mediator of immune response;GO:0002250 adaptive immune response		Predicted secreted proteins					1.0	0.0	0.0	0.0	0.0	0.0	0.0	0.0	0.0	0.0	0.0	0.0	0.0	0.0	0.0	0.0	0.0	0.0	0.0	0.0
ENSG00000189233.11	389643	ensembl_gene_id	H. sapiens	389643	H. sapiens	NUGGC	nuclear GTPase, germinal center associated	GO:0033262 regulation of nuclear cell cycle DNA replication;GO:0090329 regulation of DNA-dependent DNA replication;GO:0006275 regulation of DNA replication		Predicted intracellular proteins					0.0	1.0	0.0	0.0	0.0	0.0	0.0	0.0	0.0	0.0	0.0	0.0	0.0	0.0	0.0	0.0	0.0	0.0	0.0	0.0
ENSG00000254815.5	692247	ensembl_gene_id	H. sapiens	692247	H. sapiens	LMNTD2-AS1	LMNTD2 antisense RNA 1								0.0	0.0	0.0	0.0	0.0	0.0	0.0	0.0	0.0	0.0	0.0	0.0	0.0	0.0	0.0	0.0	0.0	0.0	0.0	0.0
ENSG00000211952.3	28400	ensembl_gene_id	H. sapiens	28400	H. sapiens	IGHV4-28	immunoglobulin heavy variable 4-28	GO:0006910 phagocytosis, recognition;GO:0006958 complement activation, classical pathway;GO:0002455 humoral immune response mediated by circulating immunoglobulin		Predicted secreted proteins					1.0	1.0	0.0	0.0	0.0	0.0	0.0	0.0	0.0	0.0	0.0	0.0	0.0	0.0	0.0	0.0	0.0	0.0	0.0	0.0
ENSG00000125166.12	2806	ensembl_gene_id	H. sapiens	2806	H. sapiens	GOT2	glutamic-oxaloacetic transaminase 2	GO:0019550 glutamate catabolic process to aspartate;GO:0019551 glutamate catabolic process to 2-oxoglutarate;GO:0006106 fumarate metabolic process		Transporters; Human disease related genes:Nervous system diseases:Epilepsy; Candidate cardiovascular disease genes; Cancer-related genes:Mutational cancer driver genes; Disease related genes; Potential drug targets; Enzymes; Predicted intracellular proteins; ENZYME proteins:Transferases		Pyridoxal phosphate; Aspartic acid; Glutamic acid; Cysteine; 4'-Deoxy-4'-Acetylyamino-Pyridoxal-5'-Phosphate		(M5926)HALLMARK MYC TARGETS V1; (M5936)HALLMARK OXIDATIVE PHOSPHORYLATION; (M5937)HALLMARK GLYCOLYSIS	0.0	0.0	0.0	1.0	0.0	0.0	0.0	0.0	0.0	1.0	0.0	0.0	0.0	0.0	0.0	0.0	0.0	0.0	0.0	0.0
ENSG00000211678.2						None	None	None	None	None	None	None	None	None	nan	nan	nan	nan	nan	nan	nan	nan	nan	nan	nan	nan	nan	nan	nan	nan	nan	nan	nan	nan
ENSG00000197549.9	649179	ensembl_gene_id	H. sapiens	649179	H. sapiens	PRAMENP	PRAME N-terminal like, pseudogene								0.0	0.0	0.0	0.0	0.0	0.0	0.0	0.0	0.0	0.0	0.0	0.0	0.0	0.0	0.0	0.0	0.0	0.0	0.0	0.0
ENSG00000211933.2	28385	ensembl_gene_id	H. sapiens	28385	H. sapiens	IGHV6-1	immunoglobulin heavy variable 6-1	GO:0006910 phagocytosis, recognition;GO:0006958 complement activation, classical pathway;GO:0002455 humoral immune response mediated by circulating immunoglobulin		Predicted secreted proteins					1.0	1.0	0.0	0.0	0.0	0.0	0.0	0.0	0.0	0.0	0.0	0.0	0.0	0.0	0.0	0.0	0.0	0.0	0.0	0.0
ENSG00000121895.7	80008	ensembl_gene_id	H. sapiens	80008	H. sapiens	TMEM156	transmembrane protein 156								0.0	0.0	0.0	0.0	0.0	0.0	0.0	0.0	0.0	0.0	0.0	0.0	0.0	0.0	0.0	0.0	0.0	0.0	0.0	0.0
ENSG00000144199.11	151313	ensembl_gene_id	H. sapiens	151313	H. sapiens	FAHD2B	fumarylacetoacetate hydrolase domain containing 2B			Predicted intracellular proteins					0.0	0.0	0.0	0.0	0.0	0.0	0.0	0.0	0.0	0.0	0.0	0.0	0.0	0.0	0.0	0.0	0.0	0.0	0.0	0.0
ENSG00000112514.15	51596	ensembl_gene_id	H. sapiens	51596	H. sapiens	CUTA	cutA divalent cation tolerance homolog	GO:0010038 response to metal ion;GO:0010035 response to inorganic substance;GO:0008104 protein localization		Predicted secreted proteins; Predicted intracellular proteins	Focal adhesion sites;Plasma membrane (Approved)				0.0	0.0	0.0	0.0	0.0	0.0	0.0	0.0	0.0	0.0	0.0	0.0	0.0	0.0	0.0	0.0	0.0	0.0	0.0	0.0
ENSG00000132879.13	93611	ensembl_gene_id	H. sapiens	93611	H. sapiens	FBXO44	F-box protein 44	GO:0006516 glycoprotein catabolic process;GO:0031146 SCF-dependent proteasomal ubiquitin-dependent protein catabolic process;GO:0030433 ubiquitin-dependent ERAD pathway		Predicted intracellular proteins	Nucleoplasm (Approved)				0.0	0.0	0.0	0.0	0.0	0.0	0.0	0.0	0.0	0.0	0.0	0.0	0.0	0.0	0.0	0.0	0.0	0.0	0.0	0.0
ENSG00000135736.5	92922	ensembl_gene_id	H. sapiens	92922	H. sapiens	CCDC102A	coiled-coil domain containing 102A			Predicted intracellular proteins	Nucleoplasm (Approved); Additional: Nuclear bodies				0.0	0.0	0.0	0.0	0.0	0.0	0.0	0.0	0.0	0.0	0.0	0.0	0.0	0.0	0.0	0.0	0.0	0.0	0.0	0.0
ENSG00000196365.11	9361	ensembl_gene_id	H. sapiens	9361	H. sapiens	LONP1	lon peptidase 1, mitochondrial	GO:0070407 oxidation-dependent protein catabolic process;GO:0032042 mitochondrial DNA metabolic process;GO:0000002 mitochondrial genome maintenance		ENZYME proteins:Hydrolases; Human disease related genes:Congenital malformations:Congenital malformations of the musculoskeletal system; Disease related genes; Potential drug targets; Enzymes; Predicted intracellular proteins; Peptidases:Serine-type peptidases	Mitochondria (Enhanced); Additional: Nucleoplasm			(M5934)HALLMARK XENOBIOTIC METABOLISM	0.0	0.0	0.0	0.0	0.0	0.0	0.0	0.0	1.0	0.0	0.0	0.0	0.0	0.0	0.0	0.0	0.0	0.0	0.0	0.0
ENSG00000126456.15	3661	ensembl_gene_id	H. sapiens	3661	H. sapiens	IRF3	interferon regulatory factor 3	GO:0071888 macrophage apoptotic process;GO:0039530 MDA-5 signaling pathway;GO:0033028 myeloid cell apoptotic process		Transcription factors:Helix-turn-helix domains; Predicted intracellular proteins; Disease related genes	Cytosol (Supported)				0.0	1.0	0.0	1.0	0.0	0.0	0.0	0.0	1.0	0.0	0.0	0.0	0.0	0.0	0.0	0.0	0.0	0.0	0.0	0.0
ENSG00000241755.1	28941	ensembl_gene_id	H. sapiens	28941	H. sapiens	IGKV1-9	immunoglobulin kappa variable 1-9	GO:0002377 immunoglobulin production;GO:0002440 production of molecular mediator of immune response;GO:0002250 adaptive immune response		Predicted secreted proteins					1.0	0.0	0.0	0.0	0.0	0.0	0.0	0.0	0.0	0.0	0.0	0.0	0.0	0.0	0.0	0.0	0.0	0.0	0.0	0.0
ENSG00000089154.10	10985	ensembl_gene_id	H. sapiens	10985	H. sapiens	GCN1	GCN1 activator of EIF2AK4	GO:1990253 cellular response to leucine starvation;GO:0036003 positive regulation of transcription from RNA polymerase II promoter in response to stress;GO:0034198 cellular response to amino acid starvation		Predicted intracellular proteins	Cytosol (Enhanced)				0.0	0.0	0.0	1.0	0.0	0.0	0.0	0.0	0.0	0.0	0.0	0.0	0.0	0.0	0.0	0.0	0.0	0.0	0.0	1.0
ENSG00000180096.11	1731	ensembl_gene_id	H. sapiens	1731	H. sapiens	SEPTIN1	septin 1	GO:0061640 cytoskeleton-dependent cytokinesis;GO:0000910 cytokinesis;GO:0017157 regulation of exocytosis		Predicted intracellular proteins	Actin filaments (Approved)		(M14)PID AURORA B PATHWAY		0.0	0.0	0.0	0.0	0.0	0.0	0.0	0.0	0.0	0.0	0.0	0.0	0.0	0.0	0.0	0.0	0.0	0.0	0.0	0.0
ENSG00000110651.11	975	ensembl_gene_id	H. sapiens	975	H. sapiens	CD81	CD81 molecule	GO:0034238 macrophage fusion;GO:0035783 CD4-positive, alpha-beta T cell costimulation;GO:0043126 regulation of 1-phosphatidylinositol 4-kinase activity		Human disease related genes:Immune system diseases:Primary immunodeficiency; CD markers; Transporters:Accessory Factors Involved in Transport; Disease related genes; Potential drug targets	Plasma membrane (Supported); Additional: Cytosol		(M277)PID INTEGRIN A4B1 PATHWAY; (M8626)SIG BCR SIGNALING PATHWAY; (M18)PID INTEGRIN1 PATHWAY	(M5947)HALLMARK IL2 STAT5 SIGNALING; (M5939)HALLMARK P53 PATHWAY	1.0	1.0	0.0	0.0	1.0	0.0	1.0	0.0	0.0	0.0	0.0	0.0	0.0	0.0	0.0	0.0	0.0	1.0	0.0	1.0
ENSG00000130787.13	9026	ensembl_gene_id	H. sapiens	9026	H. sapiens	HIP1R	huntingtin interacting protein 1 related	GO:1905443 regulation of clathrin coat assembly;GO:1905445 positive regulation of clathrin coat assembly;GO:2000588 positive regulation of platelet-derived growth factor receptor-beta signaling pathway		Predicted intracellular proteins; Cancer-related genes:Candidate cancer biomarkers	Cytosol;Plasma membrane (Supported); Additional: Vesicles				0.0	1.0	0.0	0.0	0.0	0.0	0.0	0.0	0.0	0.0	0.0	0.0	0.0	0.0	0.0	0.0	0.0	0.0	0.0	0.0
ENSG00000178035.11	3615	ensembl_gene_id	H. sapiens	3615	H. sapiens	IMPDH2	inosine monophosphate dehydrogenase 2	GO:0097292 XMP metabolic process;GO:0097293 XMP biosynthetic process;GO:0097294 'de novo' XMP biosynthetic process		Enzymes; FDA approved drug targets:Small molecule drugs; Predicted intracellular proteins; ENZYME proteins:Oxidoreductases	Cytosol (Supported); Additional: Rods & Rings	NADH; Mycophenolate mofetil; Ribavirin; Mycophenolic acid; Selenazole-4-carboxyamide-adenine dinucleotide; 6-Chloropurine Riboside, 5'-Monophosphate; Inosinic Acid; VX-148		(M5898)HALLMARK DNA REPAIR; (M5926)HALLMARK MYC TARGETS V1	0.0	0.0	0.0	0.0	1.0	0.0	0.0	0.0	0.0	0.0	0.0	0.0	0.0	0.0	1.0	0.0	0.0	0.0	0.0	0.0
ENSG00000143799.12	142	ensembl_gene_id	H. sapiens	142	H. sapiens	PARP1	poly(ADP-ribose) polymerase 1	GO:0018424 peptidyl-glutamic acid poly-ADP-ribosylation;GO:1903518 positive regulation of single strand break repair;GO:1904762 positive regulation of myofibroblast differentiation		FDA approved drug targets:Small molecule drugs; Cancer-related genes:Candidate cancer biomarkers; Enzymes; Predicted intracellular proteins; ENZYME proteins:Transferases	Nucleoplasm (Enhanced); Additional: Nucleoli	Theophylline; Zinc; Carba-nicotinamide-adenine-dinucleotide; NU1025; Nicotinamide; 2-{3-[4-(4-Fluorophenyl)-3,6-Dihydro-1(2h)-Pyridinyl]Propyl}-8-Methyl-4(3h)-Quinazolinone; 3-Methoxybenzamide; 2-(4-Chlorophenyl)-5-Quinoxalinecarboxamide; 3,4-Dihydro-5-Methyl-Isoquinolinone; 2-(3'-Methoxyphenyl) Benzimidazole-4-Carboxamide; 6-AMINO-BENZO[DE]ISOQUINOLINE-1,3-DIONE; Veliparib; A-620223; 5-FLUORO-1-…	(M7997)SA CASPASE CASCADE; (M71)PID ILK PATHWAY; (M288)PID HES HEY PATHWAY		0.0	0.0	0.0	1.0	1.0	1.0	0.0	0.0	1.0	1.0	0.0	1.0	0.0	0.0	0.0	0.0	0.0	0.0	0.0	1.0
ENSG00000070814.17	6949	ensembl_gene_id	H. sapiens	6949	H. sapiens	TCOF1	treacle ribosome biogenesis factor 1	GO:0042790 nucleolar large rRNA transcription by RNA polymerase I;GO:0014029 neural crest formation;GO:0009303 rRNA transcription		Predicted intracellular proteins; Disease related genes; Human disease related genes:Other congenital disorders:Ribosomopathies	Nucleoli fibrillar center (Enhanced)			(M5928)HALLMARK MYC TARGETS V2	0.0	0.0	0.0	1.0	0.0	0.0	0.0	0.0	0.0	0.0	0.0	0.0	0.0	0.0	0.0	0.0	0.0	0.0	0.0	0.0
ENSG00000132182.11	23225	ensembl_gene_id	H. sapiens	23225	H. sapiens	NUP210	nucleoporin 210	GO:0051028 mRNA transport;GO:0050657 nucleic acid transport;GO:0050658 RNA transport		Transporters:Transporter channels and pores					0.0	0.0	0.0	1.0	0.0	0.0	0.0	0.0	0.0	0.0	0.0	0.0	0.0	0.0	0.0	0.0	1.0	0.0	0.0	0.0
ENSG00000136717.14	274	ensembl_gene_id	H. sapiens	274	H. sapiens	BIN1	bridging integrator 1	GO:0106135 negative regulation of cardiac muscle cell contraction;GO:1903946 negative regulation of ventricular cardiac muscle cell action potential;GO:0060988 lipid tube assembly		Predicted intracellular proteins; Human disease related genes:Musculoskeletal diseases:Muscular diseases; Disease related genes	Cytosol (Supported)		(M67)PID ARF6 TRAFFICKING PATHWAY; (M19)PID P73PATHWAY	(M5893)HALLMARK MITOTIC SPINDLE; (M5909)HALLMARK MYOGENESIS	0.0	1.0	0.0	0.0	0.0	0.0	0.0	0.0	0.0	0.0	0.0	0.0	0.0	0.0	0.0	0.0	0.0	0.0	0.0	0.0
ENSG00000177943.13	158056	ensembl_gene_id	H. sapiens	158056	H. sapiens	MAMDC4	MAM domain containing 4	GO:0015031 protein transport;GO:0045184 establishment of protein localization;GO:0071705 nitrogen compound transport			Nucleoplasm (Approved); Additional: Cytosol				0.0	0.0	0.0	0.0	0.0	0.0	0.0	0.0	0.0	0.0	0.0	0.0	0.0	0.0	0.0	0.0	0.0	0.0	0.0	0.0
ENSG00000139626.15	3695	ensembl_gene_id	H. sapiens	3695	H. sapiens	ITGB7	integrin subunit beta 7	GO:0003366 cell-matrix adhesion involved in ameboidal cell migration;GO:0050901 leukocyte tethering or rolling;GO:0061756 leukocyte adhesion to vascular endothelial cell		Predicted intracellular proteins; FDA approved drug targets:Biotech drugs; Cancer-related genes:Mutated cancer genes	Cytosol;Plasma membrane (Approved)	R1295; Vedolizumab	(M212)PID INTEGRIN5 PATHWAY; (M47)PID INTEGRIN CS PATHWAY; (M156)PID ECADHERIN NASCENT AJ PATHWAY	(M5913)HALLMARK INTERFERON GAMMA RESPONSE	0.0	0.0	0.0	0.0	0.0	0.0	0.0	0.0	0.0	0.0	0.0	0.0	0.0	0.0	0.0	0.0	0.0	0.0	0.0	0.0
ENSG00000139193.3	939	ensembl_gene_id	H. sapiens	939	H. sapiens	CD27	CD27 molecule	GO:0045579 positive regulation of B cell differentiation;GO:0070233 negative regulation of T cell apoptotic process;GO:0045577 regulation of B cell differentiation		Disease related genes; CD markers; Cancer-related genes:Candidate cancer biomarkers					1.0	1.0	0.0	0.0	0.0	0.0	1.0	0.0	0.0	0.0	0.0	0.0	0.0	0.0	0.0	0.0	0.0	0.0	0.0	1.0
ENSG00000198276.15	54963	ensembl_gene_id	H. sapiens	54963	H. sapiens	UCKL1	uridine-cytidine kinase 1 like 1	GO:0043097 pyrimidine nucleoside salvage;GO:0044211 CTP salvage;GO:0046134 pyrimidine nucleoside biosynthetic process		Enzymes; Predicted intracellular proteins; ENZYME proteins:Transferases	Endoplasmic reticulum (Approved)	5-O-phosphono-alpha-D-ribofuranosyl diphosphate; Uracil; Uridine monophosphate; Guanosine-5'-Triphosphate			0.0	0.0	0.0	0.0	0.0	0.0	0.0	0.0	0.0	1.0	0.0	1.0	0.0	0.0	1.0	0.0	0.0	0.0	0.0	0.0
ENSG00000180900.18	23513	ensembl_gene_id	H. sapiens	23513	H. sapiens	SCRIB	scribble planar cell polarity protein	GO:0098968 neurotransmitter receptor transport postsynaptic membrane to endosome;GO:1902946 protein localization to early endosome;GO:0021747 cochlear nucleus development		Predicted intracellular proteins; Disease related genes	Cell Junctions;Plasma membrane (Enhanced); Additional: Nucleoplasm;Rods & Rings				0.0	1.0	0.0	0.0	1.0	0.0	1.0	0.0	0.0	0.0	0.0	0.0	0.0	0.0	0.0	0.0	0.0	0.0	0.0	0.0
ENSG00000128739.21	6638	ensembl_gene_id	H. sapiens	6638	H. sapiens	SNRPN	small nuclear ribonucleoprotein polypeptide N	GO:0000377 RNA splicing, via transesterification reactions with bulged adenosine as nucleophile;GO:0000398 mRNA splicing, via spliceosome;GO:0000375 RNA splicing, via transesterification reactions		Human disease related genes:Other congenital disorders:Chromosomal abnormalities; Predicted intracellular proteins	Nucleoplasm (Approved)				0.0	0.0	0.0	1.0	0.0	0.0	0.0	0.0	0.0	0.0	0.0	0.0	0.0	0.0	0.0	0.0	0.0	0.0	0.0	0.0
ENSG00000221829.9	2189	ensembl_gene_id	H. sapiens	2189	H. sapiens	FANCG	FA complementation group G	GO:0001541 ovarian follicle development;GO:0006513 protein monoubiquitination;GO:0008585 female gonad development		Human disease related genes:Cardiovascular diseases:Hematologic diseases; Predicted intracellular proteins; Cancer-related genes; Disease related genes	Cytosol;Plasma membrane (Approved); Additional: Nucleoli		(M258)PID BARD1 PATHWAY; (M1)PID FANCONI PATHWAY		0.0	0.0	0.0	0.0	0.0	1.0	0.0	0.0	1.0	0.0	0.0	0.0	0.0	0.0	0.0	0.0	0.0	0.0	0.0	0.0
ENSG00000095319.14	23511	ensembl_gene_id	H. sapiens	23511	H. sapiens	NUP188	nucleoporin 188	GO:0006405 RNA export from nucleus;GO:0006606 protein import into nucleus;GO:0051170 import into nucleus		Transporters:Transporter channels and pores; Predicted intracellular proteins; Disease related genes; Potential drug targets	Nucleoplasm (Uncertain); Additional: Cytosol;Nucleoli				0.0	0.0	0.0	1.0	0.0	0.0	0.0	0.0	0.0	0.0	0.0	0.0	0.0	0.0	0.0	0.0	1.0	0.0	0.0	0.0
ENSG00000185101.12	338440	ensembl_gene_id	H. sapiens	338440	H. sapiens	ANO9	anoctamin 9	GO:1902939 negative regulation of intracellular calcium activated chloride channel activity;GO:1903796 negative regulation of inorganic anion transmembrane transport;GO:2001226 negative regulation of chloride transport		Transporters:Transporter channels and pores	Golgi apparatus (Uncertain)				0.0	1.0	0.0	0.0	0.0	0.0	0.0	0.0	0.0	0.0	0.0	0.0	0.0	0.0	0.0	0.0	0.0	0.0	0.0	0.0
ENSG00000211970.3	28391	ensembl_gene_id	H. sapiens	28391	H. sapiens	IGHV4-61	immunoglobulin heavy variable 4-61	GO:0006910 phagocytosis, recognition;GO:0006958 complement activation, classical pathway;GO:0002455 humoral immune response mediated by circulating immunoglobulin		Predicted secreted proteins					1.0	1.0	0.0	0.0	0.0	0.0	0.0	0.0	0.0	0.0	0.0	0.0	0.0	0.0	0.0	0.0	0.0	0.0	0.0	0.0
ENSG00000130827.6	55558	ensembl_gene_id	H. sapiens	55558	H. sapiens	PLXNA3	plexin A3	GO:0021636 trigeminal nerve morphogenesis;GO:0021637 trigeminal nerve structural organization;GO:0021785 branchiomotor neuron axon guidance			Plasma membrane;Vesicles (Approved); Additional: Nucleoplasm		(M5880)NABA ECM AFFILIATED; (M5885)NABA MATRISOME ASSOCIATED; (M5889)NABA MATRISOME		0.0	0.0	0.0	1.0	0.0	0.0	0.0	0.0	0.0	0.0	0.0	0.0	0.0	0.0	0.0	0.0	0.0	0.0	0.0	0.0
ENSG00000159640.15	1636	ensembl_gene_id	H. sapiens	1636	H. sapiens	ACE	angiotensin I converting enzyme	GO:0071838 cell proliferation in bone marrow;GO:0060177 regulation of angiotensin metabolic process;GO:1903597 negative regulation of gap junction assembly		FDA approved drug targets:Small molecule drugs; Candidate cardiovascular disease genes; CD markers; Human disease related genes:Immune system diseases:Allergies and autoimmune diseases; ENZYME proteins:Hydrolases; Predicted secreted proteins; Human disease related genes:Congenital malformations:Congenital malformations of the urinary system; Peptidases:Metallopeptidases; Human disease related gen…	Vesicles (Approved)	Ramipril; Fosinopril; Trandolapril; Benazepril; Enalapril; Candoxatril; Moexipril; Lisinopril; Perindopril; Quinapril; Omapatrilat; Rescinnamine; Captopril; Cilazapril; Spirapril; Epicaptopril; N-acetyl-alpha-D-glucosamine; Temocapril; Enalaprilat; Zofenopril; Cilazaprilat	(M11736)SA MMP CYTOKINE CONNECTION	(M5951)HALLMARK SPERMATOGENESIS; (M5953)HALLMARK KRAS SIGNALING UP	0.0	1.0	0.0	1.0	1.0	0.0	0.0	0.0	0.0	0.0	0.0	0.0	0.0	0.0	0.0	0.0	0.0	0.0	0.0	1.0
ENSG00000103253.17	84264	ensembl_gene_id	H. sapiens	84264	H. sapiens	HAGHL	hydroxyacylglutathione hydrolase like			Predicted intracellular proteins					0.0	0.0	0.0	0.0	0.0	0.0	0.0	0.0	0.0	0.0	0.0	0.0	0.0	0.0	0.0	0.0	0.0	0.0	0.0	0.0
ENSG00000136457.9	1101	ensembl_gene_id	H. sapiens	1101	H. sapiens	CHAD	chondroadherin	GO:1900154 regulation of bone trabecula formation;GO:1900155 negative regulation of bone trabecula formation;GO:0060348 bone development		Predicted secreted proteins; Predicted intracellular proteins			(M5882)NABA PROTEOGLYCANS; (M5884)NABA CORE MATRISOME; (M5889)NABA MATRISOME		0.0	0.0	0.0	0.0	0.0	0.0	0.0	0.0	0.0	0.0	0.0	0.0	0.0	0.0	0.0	0.0	0.0	0.0	0.0	0.0
ENSG00000136811.16	4957	ensembl_gene_id	H. sapiens	4957	H. sapiens	ODF2	outer dense fiber of sperm tails 2	GO:0010457 centriole-centriole cohesion;GO:1902017 regulation of cilium assembly;GO:0007098 centrosome cycle		Predicted intracellular proteins	Centrosome (Supported); Additional: Vesicles		(M129)PID PLK1 PATHWAY	(M5901)HALLMARK G2M CHECKPOINT	0.0	0.0	0.0	0.0	0.0	0.0	0.0	0.0	0.0	0.0	0.0	0.0	0.0	0.0	0.0	0.0	0.0	0.0	0.0	0.0
ENSG00000129347.19	65095	ensembl_gene_id	H. sapiens	65095	H. sapiens	KRI1	KRI1 homolog	GO:0000447 endonucleolytic cleavage in ITS1 to separate SSU-rRNA from 5.8S rRNA and LSU-rRNA from tricistronic rRNA transcript (SSU-rRNA, 5.8S rRNA, LSU-rRNA);GO:0000478 endonucleolytic cleavage involved in rRNA processing;GO:0000479 endonucleolytic cleavage of tricistronic rRNA transcript (SSU-rRNA, 5.8S rRNA, LSU-rRNA)		Predicted intracellular proteins	Nucleoli (Enhanced)				0.0	0.0	1.0	0.0	0.0	0.0	0.0	0.0	0.0	0.0	0.0	0.0	0.0	0.0	0.0	0.0	0.0	0.0	0.0	0.0
ENSG00000090097.21	57060	ensembl_gene_id	H. sapiens	57060	H. sapiens	PCBP4	poly(rC) binding protein 4	GO:0048025 negative regulation of mRNA splicing, via spliceosome;GO:0033119 negative regulation of RNA splicing;GO:0050686 negative regulation of mRNA processing		Predicted intracellular proteins	Cytosol (Supported)		(M145)PID P53 DOWNSTREAM PATHWAY		0.0	0.0	0.0	0.0	0.0	0.0	0.0	0.0	0.0	0.0	0.0	0.0	0.0	0.0	0.0	0.0	0.0	0.0	0.0	0.0
ENSG00000104907.12	55621	ensembl_gene_id	H. sapiens	55621	H. sapiens	TRMT1	tRNA methyltransferase 1	GO:0002940 tRNA N2-guanine methylation;GO:0030488 tRNA methylation;GO:0001510 RNA methylation		Human disease related genes:Other diseases:Mental and behavioural disorders; Disease related genes; Potential drug targets; Enzymes; Predicted intracellular proteins; ENZYME proteins:Transferases	Cytosol;Plasma membrane (Approved); Additional: Nucleoplasm				0.0	0.0	1.0	1.0	0.0	0.0	0.0	1.0	0.0	0.0	1.0	0.0	0.0	0.0	0.0	0.0	0.0	0.0	0.0	0.0
ENSG00000282600.2	28402	ensembl_gene_id	H. sapiens	28402	H. sapiens	IGHV3-69-1	immunoglobulin heavy variable 3-69-1 (pseudogene)								0.0	0.0	0.0	0.0	0.0	0.0	0.0	0.0	0.0	0.0	0.0	0.0	0.0	0.0	0.0	0.0	0.0	0.0	0.0	0.0
ENSG00000211655.3	28826	ensembl_gene_id	H. sapiens	28826	H. sapiens	IGLV1-36	immunoglobulin lambda variable 1-36	GO:0002377 immunoglobulin production;GO:0002440 production of molecular mediator of immune response;GO:0002250 adaptive immune response		Predicted secreted proteins					1.0	0.0	0.0	0.0	0.0	0.0	0.0	0.0	0.0	0.0	0.0	0.0	0.0	0.0	0.0	0.0	0.0	0.0	0.0	0.0
ENSG00000108963.17	1801	ensembl_gene_id	H. sapiens	1801	H. sapiens	DPH1	diphthamide biosynthesis 1	GO:0017182 peptidyl-diphthamide metabolic process;GO:0017183 peptidyl-diphthamide biosynthetic process from peptidyl-histidine;GO:1900247 regulation of cytoplasmic translational elongation		Human disease related genes:Congenital malformations:Other congenital malformations; Disease related genes; Potential drug targets; Enzymes; Predicted intracellular proteins; ENZYME proteins:Transferases	Nucleoplasm (Approved); Additional: Cell Junctions				0.0	0.0	0.0	0.0	0.0	0.0	0.0	0.0	0.0	0.0	0.0	0.0	0.0	0.0	0.0	0.0	0.0	0.0	1.0	0.0
ENSG00000185049.14	7469	ensembl_gene_id	H. sapiens	7469	H. sapiens	NELFA	negative elongation factor complex member A	GO:0034244 negative regulation of transcription elongation from RNA polymerase II promoter;GO:0032785 negative regulation of DNA-templated transcription, elongation;GO:0051571 positive regulation of histone H3-K4 methylation		Predicted intracellular proteins	Nuclear bodies;Nucleoplasm (Enhanced)				0.0	0.0	0.0	0.0	0.0	0.0	0.0	0.0	0.0	0.0	0.0	0.0	0.0	0.0	0.0	0.0	1.0	0.0	0.0	0.0
ENSG00000119777.18	54867	ensembl_gene_id	H. sapiens	54867	H. sapiens	TMEM214	transmembrane protein 214	GO:0006915 apoptotic process;GO:0012501 programmed cell death;GO:0008219 cell death		Predicted intracellular proteins	Cytosol;Endoplasmic reticulum;Golgi apparatus (Supported)				0.0	0.0	0.0	0.0	0.0	0.0	0.0	0.0	0.0	0.0	0.0	0.0	0.0	0.0	0.0	0.0	0.0	0.0	0.0	0.0
ENSG00000103335.21	9780	ensembl_gene_id	H. sapiens	9780	H. sapiens	PIEZO1	piezo type mechanosensitive ion channel component 1	GO:0033634 positive regulation of cell-cell adhesion mediated by integrin;GO:0033632 regulation of cell-cell adhesion mediated by integrin;GO:0033625 positive regulation of integrin activation		Human disease related genes:Cardiovascular diseases:Hematologic diseases; Human disease related genes:Congenital malformations:Congenital malformations of skin; Disease related genes; Potential drug targets; Transporters:Transporter channels and pores; Predicted intracellular proteins					0.0	0.0	0.0	0.0	0.0	0.0	1.0	0.0	0.0	0.0	0.0	0.0	1.0	0.0	0.0	0.0	0.0	0.0	0.0	0.0
ENSG00000167702.11	90990	ensembl_gene_id	H. sapiens	90990	H. sapiens	KIFC2	kinesin family member C2	GO:0090307 mitotic spindle assembly;GO:0007052 mitotic spindle organization;GO:0051225 spindle assembly		Predicted intracellular proteins	Nucleoplasm (Approved); Additional: Cytosol				0.0	0.0	1.0	0.0	0.0	0.0	0.0	0.0	0.0	0.0	0.0	0.0	0.0	0.0	0.0	0.0	0.0	0.0	0.0	0.0
ENSG00000137166.14	116113	ensembl_gene_id	H. sapiens	116113	H. sapiens	FOXP4	forkhead box P4	GO:0000122 negative regulation of transcription by RNA polymerase II;GO:0045892 negative regulation of transcription, DNA-templated;GO:1903507 negative regulation of nucleic acid-templated transcription		Transcription factors:Helix-turn-helix domains; Predicted intracellular proteins	Cytosol;Nucleoplasm (Approved)				0.0	0.0	0.0	0.0	0.0	0.0	0.0	0.0	0.0	0.0	0.0	0.0	0.0	0.0	0.0	0.0	0.0	0.0	0.0	0.0
ENSG00000211611.2	28906	ensembl_gene_id	H. sapiens	28906	H. sapiens	IGKV6-21	immunoglobulin kappa variable 6-21 (non-functional)	GO:0002377 immunoglobulin production;GO:0002440 production of molecular mediator of immune response;GO:0002250 adaptive immune response		Predicted secreted proteins					1.0	0.0	0.0	0.0	0.0	0.0	0.0	0.0	0.0	0.0	0.0	0.0	0.0	0.0	0.0	0.0	0.0	0.0	0.0	0.0
ENSG00000168096.14	124401	ensembl_gene_id	H. sapiens	124401	H. sapiens	ANKS3	ankyrin repeat and sterile alpha motif domain containing 3			Predicted intracellular proteins	Nucleoplasm (Approved); Additional: Cytosol				0.0	0.0	0.0	0.0	0.0	0.0	0.0	0.0	0.0	0.0	0.0	0.0	0.0	0.0	0.0	0.0	0.0	0.0	0.0	0.0
ENSG00000251546.1	28893	ensembl_gene_id	H. sapiens	28893	H. sapiens	IGKV1D-39	immunoglobulin kappa variable 1D-39	GO:0002377 immunoglobulin production;GO:0002440 production of molecular mediator of immune response;GO:0002250 adaptive immune response		Predicted secreted proteins					1.0	0.0	0.0	0.0	0.0	0.0	0.0	0.0	0.0	0.0	0.0	0.0	0.0	0.0	0.0	0.0	0.0	0.0	0.0	0.0
ENSG00000182199.10	6472	ensembl_gene_id	H. sapiens	6472	H. sapiens	SHMT2	serine hydroxymethyltransferase 2	GO:0019264 glycine biosynthetic process from serine;GO:0006565 L-serine catabolic process;GO:0006545 glycine biosynthetic process		Enzymes; Predicted intracellular proteins; ENZYME proteins:Transferases	Mitochondria (Supported); Additional: Microtubules	Pyridoxal phosphate; Tetrahydrofolic acid; Glycine; Artenimol		(M5924)HALLMARK MTORC1 SIGNALING; (M5934)HALLMARK XENOBIOTIC METABOLISM	0.0	1.0	0.0	1.0	0.0	0.0	0.0	0.0	0.0	1.0	0.0	0.0	0.0	0.0	1.0	0.0	0.0	0.0	0.0	0.0
ENSG00000211664.2	28814	ensembl_gene_id	H. sapiens	28814	H. sapiens	IGLV2-18	immunoglobulin lambda variable 2-18	GO:0002377 immunoglobulin production;GO:0002440 production of molecular mediator of immune response;GO:0002250 adaptive immune response		Predicted secreted proteins					1.0	0.0	0.0	0.0	0.0	0.0	0.0	0.0	0.0	0.0	0.0	0.0	0.0	0.0	0.0	0.0	0.0	0.0	0.0	0.0
ENSG00000211893.3	3501	ensembl_gene_id	H. sapiens	3501	H. sapiens	IGHG2	immunoglobulin heavy constant gamma 2 (G2m marker)	GO:0006910 phagocytosis, recognition;GO:0006958 complement activation, classical pathway;GO:0002455 humoral immune response mediated by circulating immunoglobulin		Predicted secreted proteins; FDA approved drug targets:Biotech drugs; Predicted intracellular proteins					1.0	1.0	0.0	0.0	0.0	0.0	0.0	0.0	0.0	0.0	0.0	0.0	0.0	0.0	0.0	0.0	0.0	0.0	0.0	0.0
ENSG00000160803.7	56893	ensembl_gene_id	H. sapiens	56893	H. sapiens	UBQLN4	ubiquilin 4	GO:1901097 negative regulation of autophagosome maturation;GO:1901096 regulation of autophagosome maturation;GO:2000042 negative regulation of double-strand break repair via homologous recombination		Transporters:Accessory Factors Involved in Transport; Predicted intracellular proteins; Disease related genes; Potential drug targets	Nucleoplasm (Supported)				0.0	0.0	0.0	0.0	0.0	0.0	0.0	0.0	1.0	0.0	0.0	0.0	0.0	0.0	0.0	0.0	0.0	0.0	0.0	1.0
ENSG00000085662.13	231	ensembl_gene_id	H. sapiens	231	H. sapiens	AKR1B1	aldo-keto reductase family 1 member B	GO:0046370 fructose biosynthetic process;GO:0071475 cellular hyperosmotic salinity response;GO:0071472 cellular response to salt stress		FDA approved drug targets:Small molecule drugs; ENZYME proteins:Oxidoreductases; Cancer-related genes:Candidate cancer biomarkers; Enzymes; Predicted intracellular proteins	Cytosol (Supported); Additional: Nucleoplasm	Glutathione; NADH; Sulindac; Inhibitor Idd 384; alpha-D-glucose 6-phosphate; Alrestatin; Fidarestat; (S,R)-fidarestat; Zenarestat; Tolrestat; N-Acetylalanine; Sorbinil; IDD552; Cacodylic acid; Nicotinamide adenine dinucleotide phosphate; Citric acid; Ranirestat; Pimagedine; QR-333; Exisulind; (2-{[(4-BROMO-2-FLUOROBENZYL)AMINO]CARBONYL}-5-CHLOROPHENOXY)ACETIC ACID; (5-CHLORO-2-{[(3-NITROBENZYL)AM…			0.0	0.0	0.0	0.0	0.0	0.0	0.0	0.0	0.0	1.0	0.0	1.0	0.0	0.0	0.0	1.0	0.0	0.0	0.0	0.0
ENSG00000126457.21	3276	ensembl_gene_id	H. sapiens	3276	H. sapiens	PRMT1	protein arginine methyltransferase 1	GO:0019919 peptidyl-arginine methylation, to asymmetrical-dimethyl arginine;GO:0046985 positive regulation of hemoglobin biosynthetic process;GO:0043985 histone H4-R3 methylation		Enzymes; Predicted intracellular proteins; ENZYME proteins:Transferases	Nucleoplasm (Supported)	S-adenosyl-L-homocysteine	(M145)PID P53 DOWNSTREAM PATHWAY		0.0	0.0	0.0	0.0	0.0	0.0	0.0	0.0	0.0	0.0	1.0	0.0	0.0	0.0	0.0	0.0	0.0	1.0	0.0	1.0
ENSG00000175048.16	79683	ensembl_gene_id	H. sapiens	79683	H. sapiens	ZDHHC14	zinc finger DHHC-type palmitoyltransferase 14	GO:0018230 peptidyl-L-cysteine S-palmitoylation;GO:0018231 peptidyl-S-diacylglycerol-L-cysteine biosynthetic process from peptidyl-cysteine;GO:0018345 protein palmitoylation		Enzymes; ENZYME proteins:Transferases	Vesicles (Uncertain)				0.0	0.0	0.0	0.0	0.0	0.0	0.0	0.0	0.0	0.0	0.0	0.0	0.0	0.0	0.0	0.0	0.0	0.0	0.0	0.0
ENSG00000177595.17	55367	ensembl_gene_id	H. sapiens	55367	H. sapiens	PIDD1	p53-induced death domain protein 1	GO:0006977 DNA damage response, signal transduction by p53 class mediator resulting in cell cycle arrest;GO:0016540 protein autoprocessing;GO:0031571 mitotic G1 DNA damage checkpoint signaling		Predicted intracellular proteins	Cytosol;Golgi apparatus (Approved)		(M220)PID CASPASE PATHWAY; (M145)PID P53 DOWNSTREAM PATHWAY	(M5939)HALLMARK P53 PATHWAY	0.0	0.0	0.0	0.0	0.0	0.0	0.0	0.0	1.0	0.0	0.0	0.0	0.0	0.0	0.0	0.0	0.0	0.0	0.0	0.0
ENSG00000107140.15	7016	ensembl_gene_id	H. sapiens	7016	H. sapiens	TESK1	testis associated actin remodelling kinase 1	GO:0090521 glomerular visceral epithelial cell migration;GO:0031953 negative regulation of protein autophosphorylation;GO:1902018 negative regulation of cilium assembly	TKL Ser/Thr protein kinase family	Enzymes; Predicted intracellular proteins; Kinases:TKL Ser/Thr protein kinases; ENZYME proteins:Transferases		Fostamatinib			0.0	0.0	0.0	0.0	0.0	0.0	0.0	0.0	0.0	0.0	0.0	0.0	0.0	0.0	0.0	0.0	0.0	0.0	0.0	1.0
ENSG00000011478.11	54814	ensembl_gene_id	H. sapiens	54814	H. sapiens	QPCTL	glutaminyl-peptide cyclotransferase like	GO:0017186 peptidyl-pyroglutamic acid biosynthetic process, using glutaminyl-peptide cyclotransferase;GO:0018199 peptidyl-glutamine modification;GO:0018193 peptidyl-amino acid modification		Enzymes; Predicted intracellular proteins; ENZYME proteins:Transferases	Golgi apparatus (Supported)				0.0	0.0	0.0	0.0	0.0	0.0	0.0	0.0	0.0	0.0	0.0	0.0	0.0	0.0	0.0	0.0	0.0	0.0	0.0	0.0
ENSG00000176946.11	51078	ensembl_gene_id	H. sapiens	51078	H. sapiens	THAP4	THAP domain containing 4	GO:0042126 nitrate metabolic process;GO:0006570 tyrosine metabolic process;GO:2001057 reactive nitrogen species metabolic process		Predicted intracellular proteins; Transcription factors:Zinc-coordinating DNA-binding domains	Nuclear speckles;Nucleoplasm (Approved)				0.0	0.0	0.0	0.0	0.0	0.0	0.0	0.0	0.0	1.0	0.0	0.0	0.0	0.0	0.0	0.0	0.0	0.0	0.0	0.0
ENSG00000122965.10	9904	ensembl_gene_id	H. sapiens	9904	H. sapiens	RBM19	RNA binding motif protein 19	GO:0040019 positive regulation of embryonic development;GO:0045995 regulation of embryonic development;GO:0000377 RNA splicing, via transesterification reactions with bulged adenosine as nucleophile		Predicted intracellular proteins	Nucleoli (Supported)				0.0	0.0	0.0	0.0	0.0	0.0	0.0	0.0	0.0	0.0	0.0	0.0	0.0	0.0	0.0	0.0	0.0	0.0	0.0	0.0
ENSG00000149136.8	6749	ensembl_gene_id	H. sapiens	6749	H. sapiens	SSRP1	structure specific recognition protein 1	GO:0006337 nucleosome disassembly;GO:0031498 chromatin disassembly;GO:0032986 protein-DNA complex disassembly		Transcription factors:Other all-alpha-helical DNA-binding domains; Predicted intracellular proteins	Cytosol (Approved); Additional: Nucleoplasm		(M256)PID TAP63 PATHWAY	(M5898)HALLMARK DNA REPAIR; (M5925)HALLMARK E2F TARGETS	0.0	0.0	0.0	0.0	0.0	0.0	0.0	0.0	1.0	0.0	0.0	0.0	0.0	0.0	0.0	0.0	1.0	0.0	0.0	0.0
ENSG00000226777.7	9834	ensembl_gene_id	H. sapiens	9834	H. sapiens	FAM30A	family with sequence similarity 30 member A								0.0	0.0	0.0	0.0	0.0	0.0	0.0	0.0	0.0	0.0	0.0	0.0	0.0	0.0	0.0	0.0	0.0	0.0	0.0	0.0
ENSG00000002745.12	51384	ensembl_gene_id	H. sapiens	51384	H. sapiens	WNT16	Wnt family member 16	GO:0003408 optic cup formation involved in camera-type eye development;GO:0090403 oxidative stress-induced premature senescence;GO:0002072 optic cup morphogenesis involved in camera-type eye development		Predicted secreted proteins; Predicted intracellular proteins			(M5493)WNT SIGNALING; (M5883)NABA SECRETED FACTORS; (M5885)NABA MATRISOME ASSOCIATED	(M5956)HALLMARK KRAS SIGNALING DN	0.0	0.0	0.0	0.0	0.0	0.0	0.0	0.0	0.0	0.0	0.0	0.0	0.0	0.0	0.0	0.0	0.0	0.0	0.0	1.0
ENSG00000099958.14	91319	ensembl_gene_id	H. sapiens	91319	H. sapiens	DERL3	derlin 3	GO:1904153 negative regulation of retrograde protein transport, ER to cytosol;GO:0070862 negative regulation of protein exit from endoplasmic reticulum;GO:1904152 regulation of retrograde protein transport, ER to cytosol		Transporters:Primary Active Transporters; Predicted intracellular proteins	Vesicles (Uncertain)				0.0	0.0	0.0	0.0	0.0	0.0	0.0	0.0	0.0	0.0	0.0	0.0	0.0	0.0	0.0	0.0	0.0	0.0	0.0	0.0
ENSG00000104964.14	166	ensembl_gene_id	H. sapiens	166	H. sapiens	TLE5	TLE family member 5, transcriptional modulator	GO:2000210 positive regulation of anoikis;GO:2000209 regulation of anoikis;GO:0060761 negative regulation of response to cytokine stimulus		Predicted intracellular proteins	Nucleoplasm (Supported)		(M70)PID PS1 PATHWAY; (M223)PID BETA CATENIN NUC PATHWAY; (M5493)WNT SIGNALING		0.0	0.0	0.0	0.0	0.0	0.0	0.0	0.0	0.0	0.0	0.0	0.0	0.0	0.0	0.0	0.0	0.0	0.0	0.0	0.0
ENSG00000083454.21	5026	ensembl_gene_id	H. sapiens	5026	H. sapiens	P2RX5	purinergic receptor P2X 5	GO:0035590 purinergic nucleotide receptor signaling pathway;GO:0033198 response to ATP;GO:0050850 positive regulation of calcium-mediated signaling		Transporters:Transporter channels and pores; Predicted intracellular proteins	Cytosol (Supported)				0.0	0.0	0.0	0.0	0.0	0.0	0.0	0.0	0.0	0.0	0.0	0.0	0.0	0.0	0.0	0.0	0.0	0.0	0.0	0.0
ENSG00000204394.12	7407	ensembl_gene_id	H. sapiens	7407	H. sapiens	VARS1	valyl-tRNA synthetase 1	GO:0006438 valyl-tRNA aminoacylation;GO:0106074 aminoacyl-tRNA metabolism involved in translational fidelity;GO:0006450 regulation of translational fidelity		ENZYME proteins:Ligase; Human disease related genes:Other diseases:Mental and behavioural disorders; Disease related genes; Potential drug targets; Enzymes; Predicted intracellular proteins	Cytosol (Enhanced)	Valine			0.0	0.0	1.0	1.0	0.0	0.0	0.0	1.0	0.0	1.0	0.0	0.0	0.0	0.0	0.0	0.0	0.0	0.0	0.0	0.0
ENSG00000008710.19	5310	ensembl_gene_id	H. sapiens	5310	H. sapiens	PKD1	polycystin 1, transient receptor potential channel interacting	GO:0072287 metanephric distal tubule morphogenesis;GO:0072237 metanephric proximal tubule development;GO:0072021 ascending thin limb development		Human disease related genes:Congenital malformations:Congenital malformations of the urinary system; Disease related genes; Potential drug targets; Transporters:Transporter channels and pores; Predicted intracellular proteins				(M5915)HALLMARK APICAL JUNCTION	0.0	0.0	0.0	0.0	0.0	0.0	0.0	0.0	0.0	0.0	0.0	0.0	0.0	0.0	0.0	0.0	0.0	0.0	0.0	1.0
ENSG00000204574.12	23	ensembl_gene_id	H. sapiens	23	H. sapiens	ABCF1	ATP binding cassette subfamily F member 1	GO:0006412 translation;GO:0043043 peptide biosynthetic process;GO:0043604 amide biosynthetic process		Transporters:Primary Active Transporters; Predicted intracellular proteins	Cytosol (Enhanced)				0.0	0.0	0.0	1.0	0.0	0.0	0.0	0.0	0.0	0.0	0.0	0.0	0.0	0.0	0.0	0.0	0.0	0.0	0.0	0.0
ENSG00000249115.8	23354	ensembl_gene_id	H. sapiens	23354	H. sapiens	HAUS5	HAUS augmin like complex subunit 5	GO:0007098 centrosome cycle;GO:0051225 spindle assembly;GO:0031023 microtubule organizing center organization		Predicted intracellular proteins					0.0	0.0	1.0	0.0	0.0	0.0	0.0	0.0	0.0	0.0	0.0	0.0	0.0	0.0	0.0	0.0	0.0	0.0	0.0	0.0
ENSG00000006025.11	114881	ensembl_gene_id	H. sapiens	114881	H. sapiens	OSBPL7	oxysterol binding protein like 7	GO:0071397 cellular response to cholesterol;GO:0036315 cellular response to sterol;GO:0006699 bile acid biosynthetic process		Predicted intracellular proteins	Cytosol;Nucleoplasm (Approved); Additional: Plasma membrane				0.0	0.0	0.0	0.0	0.0	0.0	0.0	0.0	0.0	1.0	0.0	0.0	0.0	0.0	0.0	0.0	0.0	0.0	0.0	0.0
ENSG00000185187.12	59307	ensembl_gene_id	H. sapiens	59307	H. sapiens	SIGIRR	single Ig and TIR domain containing	GO:0031665 negative regulation of lipopolysaccharide-mediated signaling pathway;GO:0032682 negative regulation of chemokine production;GO:0031664 regulation of lipopolysaccharide-mediated signaling pathway		Predicted intracellular proteins	Cytosol;Nucleoli fibrillar center (Approved)				0.0	0.0	0.0	0.0	0.0	0.0	0.0	0.0	0.0	0.0	0.0	0.0	0.0	0.0	0.0	0.0	0.0	0.0	0.0	0.0
ENSG00000197785.13	55210	ensembl_gene_id	H. sapiens	55210	H. sapiens	ATAD3A	ATPase family AAA domain containing 3A	GO:0140374 antiviral innate immune response;GO:0051607 defense response to virus;GO:0140546 defense response to symbiont		Predicted intracellular proteins; Disease related genes; Human disease related genes:Congenital disorders of metabolism:Mitochondrial diseases	Mitochondria (Enhanced)				0.0	1.0	0.0	0.0	0.0	0.0	0.0	0.0	0.0	0.0	0.0	0.0	0.0	0.0	0.0	0.0	0.0	0.0	0.0	0.0
ENSG00000211890.3	3494	ensembl_gene_id	H. sapiens	3494	H. sapiens	IGHA2	immunoglobulin heavy constant alpha 2 (A2m marker)	GO:0060267 positive regulation of respiratory burst;GO:0003094 glomerular filtration;GO:0097205 renal filtration		Predicted secreted proteins; Predicted intracellular proteins					1.0	1.0	0.0	0.0	0.0	0.0	0.0	0.0	0.0	0.0	0.0	0.0	0.0	0.0	0.0	1.0	0.0	0.0	0.0	0.0
ENSG00000160072.19	83858	ensembl_gene_id	H. sapiens	83858	H. sapiens	ATAD3B	ATPase family AAA domain containing 3B	GO:0007005 mitochondrion organization;GO:0006996 organelle organization;GO:0016043 cellular component organization		Predicted intracellular proteins	Mitochondria (Enhanced)				0.0	0.0	0.0	0.0	0.0	0.0	0.0	0.0	0.0	0.0	0.0	0.0	0.0	0.0	0.0	0.0	0.0	0.0	0.0	0.0
ENSG00000168439.16	10963	ensembl_gene_id	H. sapiens	10963	H. sapiens	STIP1	stress induced phosphoprotein 1	GO:0098760 response to interleukin-7;GO:0098761 cellular response to interleukin-7;GO:0071345 cellular response to cytokine stimulus		Predicted intracellular proteins	Nucleoplasm;Plasma membrane (Approved); Additional: Cytosol	Copper		(M5941)HALLMARK UV RESPONSE UP; (M5924)HALLMARK MTORC1 SIGNALING	0.0	0.0	0.0	1.0	0.0	0.0	0.0	0.0	0.0	0.0	0.0	0.0	0.0	0.0	0.0	0.0	0.0	0.0	0.0	0.0
ENSG00000160214.12	8568	ensembl_gene_id	H. sapiens	8568	H. sapiens	RRP1	ribosomal RNA processing 1	GO:0006364 rRNA processing;GO:0016072 rRNA metabolic process;GO:0042254 ribosome biogenesis		Predicted intracellular proteins	Mitotic chromosome;Nucleoli (Enhanced)				0.0	0.0	1.0	1.0	0.0	0.0	0.0	0.0	0.0	0.0	0.0	0.0	0.0	0.0	0.0	0.0	0.0	0.0	0.0	0.0
ENSG00000105771.13	56006	ensembl_gene_id	H. sapiens	56006	H. sapiens	SMG9	SMG9 nonsense mediated mRNA decay factor	GO:0000184 nuclear-transcribed mRNA catabolic process, nonsense-mediated decay;GO:0000956 nuclear-transcribed mRNA catabolic process;GO:0006402 mRNA catabolic process		Human disease related genes:Congenital malformations:Other congenital malformations; Predicted intracellular proteins; Disease related genes	Cytosol;Mitochondria (Approved); Additional: Plasma membrane				0.0	0.0	0.0	1.0	0.0	0.0	0.0	0.0	0.0	0.0	0.0	0.0	0.0	0.0	0.0	0.0	0.0	0.0	0.0	0.0
ENSG00000071462.11	114049	ensembl_gene_id	H. sapiens	114049	H. sapiens	BUD23	BUD23 rRNA methyltransferase and ribosome maturation factor	GO:0070476 rRNA (guanine-N7)-methylation;GO:0036265 RNA (guanine-N7)-methylation;GO:2000234 positive regulation of rRNA processing		Human disease related genes:Other congenital disorders:Chromosomal abnormalities; Predicted intracellular proteins	Nucleoli;Nucleoplasm (Supported)				0.0	0.0	1.0	1.0	0.0	0.0	0.0	0.0	0.0	0.0	1.0	0.0	0.0	0.0	0.0	0.0	0.0	0.0	0.0	0.0
ENSG00000182195.7	23641	ensembl_gene_id	H. sapiens	23641	H. sapiens	LDOC1	LDOC1 regulator of NFKB signaling	GO:1903547 regulation of growth hormone activity;GO:0060137 maternal process involved in parturition;GO:0071225 cellular response to muramyl dipeptide		Predicted intracellular proteins	Nucleoli;Nucleoplasm (Supported)				0.0	1.0	0.0	0.0	0.0	0.0	0.0	0.0	0.0	0.0	0.0	0.0	0.0	0.0	0.0	0.0	0.0	0.0	0.0	0.0
ENSG00000267342.1						None	None	None	None	None	None	None	None	None	nan	nan	nan	nan	nan	nan	nan	nan	nan	nan	nan	nan	nan	nan	nan	nan	nan	nan	nan	nan
ENSG00000141577.13	22994	ensembl_gene_id	H. sapiens	22994	H. sapiens	CEP131	centrosomal protein 131	GO:1990953 intramanchette transport;GO:1905198 manchette assembly;GO:0035735 intraciliary transport involved in cilium assembly		Predicted intracellular proteins	Microtubules (Supported); Additional: Centriolar satellite;Cytokinetic bridge			(M5893)HALLMARK MITOTIC SPINDLE	0.0	0.0	1.0	0.0	0.0	0.0	0.0	0.0	0.0	0.0	0.0	0.0	0.0	0.0	0.0	0.0	0.0	0.0	0.0	0.0
ENSG00000105726.16	57130	ensembl_gene_id	H. sapiens	57130	H. sapiens	ATP13A1	ATPase 13A1	GO:0140569 extraction of mislocalized protein from ER membrane;GO:0140568 extraction of mislocalized protein from membrane;GO:0071421 manganese ion transmembrane transport		Transporters:Primary Active Transporters; Predicted intracellular proteins	Vesicles (Approved)				0.0	0.0	0.0	0.0	0.0	0.0	0.0	0.0	0.0	0.0	0.0	0.0	0.0	0.0	0.0	0.0	0.0	0.0	0.0	0.0
ENSG00000188599.17	100874381	ensembl_gene_id	H. sapiens	100874381	H. sapiens	NPIPP1	nuclear pore complex interacting protein pseudogene 1								0.0	0.0	0.0	0.0	0.0	0.0	0.0	0.0	0.0	0.0	0.0	0.0	0.0	0.0	0.0	0.0	0.0	0.0	0.0	0.0
ENSG00000100297.15	4174	ensembl_gene_id	H. sapiens	4174	H. sapiens	MCM5	minichromosome maintenance complex component 5	GO:0000727 double-strand break repair via break-induced replication;GO:0006268 DNA unwinding involved in DNA replication;GO:0006270 DNA replication initiation		Cancer-related genes:Candidate cancer biomarkers; ENZYME proteins:Hydrolases; Human disease related genes:Congenital malformations:Other congenital malformations; Disease related genes; Potential drug targets; Enzymes; Predicted intracellular proteins	Nucleoplasm (Enhanced)			(M5928)HALLMARK MYC TARGETS V2; (M5901)HALLMARK G2M CHECKPOINT; (M5925)HALLMARK E2F TARGETS	0.0	0.0	0.0	0.0	0.0	1.0	0.0	0.0	1.0	0.0	0.0	0.0	0.0	0.0	0.0	0.0	0.0	0.0	0.0	0.0
ENSG00000133460.19	66035	ensembl_gene_id	H. sapiens	66035	H. sapiens	SLC2A11	solute carrier family 2 member 11	GO:1904659 glucose transmembrane transport;GO:0008645 hexose transmembrane transport;GO:0015749 monosaccharide transmembrane transport		Transporters:Electrochemical Potential-driven transporters	Cell Junctions (Uncertain); Additional: Nucleoplasm				0.0	0.0	0.0	0.0	0.0	0.0	0.0	0.0	0.0	0.0	0.0	0.0	0.0	0.0	0.0	0.0	0.0	0.0	0.0	0.0
ENSG00000105486.13	3978	ensembl_gene_id	H. sapiens	3978	H. sapiens	LIG1	DNA ligase 1	GO:1903461 Okazaki fragment processing involved in mitotic DNA replication;GO:0033567 DNA replication, Okazaki fragment processing;GO:0006273 lagging strand elongation		Enzymes; ENZYME proteins:Ligase; Predicted intracellular proteins; Human disease related genes:Immune system diseases:Primary immunodeficiency	Nucleoplasm (Supported); Additional: Golgi apparatus;Vesicles	Bleomycin		(M5898)HALLMARK DNA REPAIR; (M5925)HALLMARK E2F TARGETS	0.0	0.0	0.0	0.0	0.0	1.0	0.0	0.0	1.0	0.0	0.0	0.0	0.0	0.0	0.0	0.0	1.0	0.0	0.0	0.0
ENSG00000151779.12	51594	ensembl_gene_id	H. sapiens	51594	H. sapiens	NBAS	NBAS subunit of NRZ tethering complex	GO:2000623 negative regulation of nuclear-transcribed mRNA catabolic process, nonsense-mediated decay;GO:2000622 regulation of nuclear-transcribed mRNA catabolic process, nonsense-mediated decay;GO:0006890 retrograde vesicle-mediated transport, Golgi to endoplasmic reticulum		Human disease related genes:Congenital malformations:Other congenital malformations; Predicted intracellular proteins; Disease related genes; Human disease related genes:Congenital disorders of metabolism:Mitochondrial diseases	Golgi apparatus (Approved); Additional: Nuclear membrane;Nucleoli				0.0	0.0	0.0	0.0	0.0	0.0	0.0	0.0	0.0	0.0	0.0	0.0	0.0	0.0	0.0	0.0	0.0	0.0	0.0	0.0
ENSG00000088808.16	23368	ensembl_gene_id	H. sapiens	23368	H. sapiens	PPP1R13B	protein phosphatase 1 regulatory subunit 13B	GO:0072332 intrinsic apoptotic signaling pathway by p53 class mediator;GO:0072331 signal transduction by p53 class mediator;GO:0097193 intrinsic apoptotic signaling pathway		Predicted intracellular proteins	Nucleoplasm (Supported); Additional: Cytosol		(M1718)SIG IL4RECEPTOR IN B LYPHOCYTES; (M1315)SIG PIP3 SIGNALING IN B LYMPHOCYTES; (M5193)SIG CHEMOTAXIS		0.0	0.0	0.0	0.0	1.0	0.0	0.0	0.0	0.0	0.0	0.0	0.0	0.0	0.0	0.0	0.0	0.0	0.0	0.0	0.0
ENSG00000130758.7	4294	ensembl_gene_id	H. sapiens	4294	H. sapiens	MAP3K10	mitogen-activated protein kinase kinase kinase 10	GO:0043507 positive regulation of JUN kinase activity;GO:0007254 JNK cascade;GO:0043506 regulation of JUN kinase activity	STE Ser/Thr protein kinase family	Enzymes; Kinases:STE Ser/Thr protein kinases; Predicted intracellular proteins; ENZYME proteins:Transferases	Actin filaments;Cytosol;Nucleoplasm (Approved)	Fostamatinib	(M20)PID P38 MKK3 6PATHWAY		0.0	0.0	0.0	0.0	0.0	0.0	0.0	0.0	0.0	0.0	0.0	0.0	0.0	0.0	0.0	0.0	0.0	0.0	0.0	1.0
ENSG00000150967.17	23457	ensembl_gene_id	H. sapiens	23457	H. sapiens	ABCB9	ATP binding cassette subfamily B member 9	GO:0035672 oligopeptide transmembrane transport;GO:0006857 oligopeptide transport;GO:0019885 antigen processing and presentation of endogenous peptide antigen via MHC class I		Transporters:Primary Active Transporters; Predicted intracellular proteins	Vesicles (Supported)			(M5949)HALLMARK PEROXISOME	0.0	0.0	0.0	1.0	0.0	0.0	0.0	0.0	0.0	0.0	0.0	0.0	0.0	0.0	0.0	0.0	0.0	0.0	0.0	0.0
ENSG00000133895.14	4221	ensembl_gene_id	H. sapiens	4221	H. sapiens	MEN1	menin 1	GO:0061469 regulation of type B pancreatic cell proliferation;GO:0051974 negative regulation of telomerase activity;GO:0002076 osteoblast development		Human disease related genes:Cancers:Cancers of the digestive system; Human disease related genes:Cancers:Cancers of eye, brain, and central nervous system; Human disease related genes:Cancers:Cancers of endocrine organs; Human disease related genes:Endocrine and metabolic diseases:Other endocrine and metabolic diseases; Human disease related genes:Endocrine and metabolic diseases:Hypothalamus and…	Nucleoplasm (Supported); Additional: Cytosol				0.0	0.0	0.0	0.0	0.0	0.0	0.0	0.0	1.0	0.0	1.0	0.0	0.0	0.0	0.0	0.0	0.0	0.0	0.0	1.0
ENSG00000168495.12	661	ensembl_gene_id	H. sapiens	661	H. sapiens	POLR3D	RNA polymerase III subunit D	GO:0006383 transcription by RNA polymerase III;GO:0032728 positive regulation of interferon-beta production;GO:0032648 regulation of interferon-beta production		Predicted intracellular proteins; RNA polymerase related proteins	Nucleoplasm (Enhanced)		(M66)PID MYC ACTIV PATHWAY		0.0	1.0	0.0	0.0	0.0	0.0	0.0	0.0	0.0	0.0	0.0	0.0	0.0	0.0	0.0	0.0	0.0	0.0	0.0	0.0
ENSG00000104897.9	8175	ensembl_gene_id	H. sapiens	8175	H. sapiens	SF3A2	splicing factor 3a subunit 2	GO:1903241 U2-type prespliceosome assembly;GO:0000389 mRNA 3'-splice site recognition;GO:0006376 mRNA splice site selection		Predicted intracellular proteins	Nucleoplasm (Approved)	Copper			0.0	0.0	1.0	1.0	0.0	0.0	0.0	0.0	0.0	0.0	0.0	0.0	0.0	0.0	0.0	0.0	0.0	0.0	0.0	0.0
ENSG00000159884.11	203260	ensembl_gene_id	H. sapiens	203260	H. sapiens	CCDC107	coiled-coil domain containing 107				Cell Junctions;Plasma membrane (Approved); Additional: Nucleoplasm				0.0	0.0	0.0	0.0	0.0	0.0	0.0	0.0	0.0	0.0	0.0	0.0	0.0	0.0	0.0	0.0	0.0	0.0	0.0	0.0
ENSG00000211640.4	28778	ensembl_gene_id	H. sapiens	28778	H. sapiens	IGLV6-57	immunoglobulin lambda variable 6-57	GO:0002377 immunoglobulin production;GO:0002440 production of molecular mediator of immune response;GO:0002250 adaptive immune response		Predicted secreted proteins					1.0	0.0	0.0	0.0	0.0	0.0	0.0	0.0	0.0	0.0	0.0	0.0	0.0	0.0	0.0	0.0	0.0	0.0	0.0	0.0
ENSG00000132781.17	4595	ensembl_gene_id	H. sapiens	4595	H. sapiens	MUTYH	mutY DNA glycosylase	GO:0045007 depurination;GO:0006285 base-excision repair, AP site formation;GO:0006298 mismatch repair		Cancer-related genes:Candidate cancer biomarkers; ENZYME proteins:Hydrolases; Human disease related genes:Digestive system diseases:Gastrointestinal diseases; Disease related genes; Enzymes; Potential drug targets; Predicted intracellular proteins	Nucleoplasm (Supported)				0.0	0.0	0.0	0.0	0.0	1.0	0.0	0.0	1.0	0.0	0.0	1.0	0.0	0.0	0.0	0.0	0.0	0.0	0.0	0.0
ENSG00000130726.11	10155	ensembl_gene_id	H. sapiens	10155	H. sapiens	TRIM28	tripartite motif containing 28	GO:1901536 negative regulation of DNA demethylation;GO:2000653 regulation of genetic imprinting;GO:0060028 convergent extension involved in axis elongation		Enzymes; Predicted intracellular proteins; ENZYME proteins:Transferases	Nucleoplasm (Enhanced)		(M84)PID ATM PATHWAY; (M261)PID P53 REGULATION PATHWAY; (M40)PID E2F PATHWAY	(M5926)HALLMARK MYC TARGETS V1	0.0	1.0	0.0	0.0	0.0	0.0	0.0	0.0	1.0	0.0	1.0	1.0	0.0	0.0	0.0	0.0	0.0	0.0	0.0	1.0
ENSG00000211650.2	28781	ensembl_gene_id	H. sapiens	28781	H. sapiens	IGLV5-45	immunoglobulin lambda variable 5-45	GO:0002377 immunoglobulin production;GO:0002440 production of molecular mediator of immune response;GO:0002250 adaptive immune response		Predicted secreted proteins					1.0	0.0	0.0	0.0	0.0	0.0	0.0	0.0	0.0	0.0	0.0	0.0	0.0	0.0	0.0	0.0	0.0	0.0	0.0	0.0
ENSG00000124243.17	55653	ensembl_gene_id	H. sapiens	55653	H. sapiens	BCAS4	breast carcinoma amplified sequence 4			Predicted intracellular proteins; Disease related genes	Cytosol;Intermediate filaments (Approved)				0.0	0.0	0.0	0.0	0.0	0.0	0.0	0.0	0.0	0.0	0.0	0.0	0.0	0.0	0.0	0.0	0.0	0.0	0.0	0.0
ENSG00000101546.12	79863	ensembl_gene_id	H. sapiens	79863	H. sapiens	RBFA	ribosome binding factor A	GO:0006364 rRNA processing;GO:0016072 rRNA metabolic process;GO:0042254 ribosome biogenesis		Predicted intracellular proteins	Mitochondria (Approved)				0.0	0.0	1.0	0.0	0.0	0.0	0.0	0.0	0.0	0.0	0.0	0.0	0.0	0.0	0.0	0.0	0.0	0.0	0.0	0.0
ENSG00000073605.18	55876	ensembl_gene_id	H. sapiens	55876	H. sapiens	GSDMB	gasdermin B	GO:0019835 cytolysis;GO:0070269 pyroptosis;GO:0042742 defense response to bacterium		Transporters:Transporter channels and pores; Predicted intracellular proteins	Nucleoplasm (Approved); Additional: Cytosol				0.0	1.0	0.0	0.0	0.0	0.0	0.0	0.0	0.0	0.0	0.0	0.0	0.0	0.0	0.0	0.0	0.0	0.0	0.0	0.0
ENSG00000071626.16	26528	ensembl_gene_id	H. sapiens	26528	H. sapiens	DAZAP1	DAZ associated protein 1	GO:0048026 positive regulation of mRNA splicing, via spliceosome;GO:0050685 positive regulation of mRNA processing;GO:0001893 maternal placenta development		Predicted intracellular proteins	Nucleoplasm (Enhanced); Additional: Cytosol				0.0	0.0	0.0	0.0	0.0	0.0	0.0	0.0	0.0	0.0	0.0	0.0	0.0	0.0	0.0	0.0	0.0	0.0	0.0	0.0
ENSG00000120910.14	5533	ensembl_gene_id	H. sapiens	5533	H. sapiens	PPP3CC	protein phosphatase 3 catalytic subunit gamma	GO:1900244 positive regulation of synaptic vesicle endocytosis;GO:1903423 positive regulation of synaptic vesicle recycling;GO:0033173 calcineurin-NFAT signaling cascade		Enzymes; ENZYME proteins:Hydrolases; Predicted intracellular proteins	Vesicles (Approved)		(M8626)SIG BCR SIGNALING PATHWAY; (M10)PID BCR 5PATHWAY		0.0	0.0	0.0	0.0	1.0	0.0	0.0	0.0	0.0	0.0	0.0	0.0	0.0	1.0	0.0	0.0	0.0	0.0	0.0	0.0
ENSG00000041880.14	10039	ensembl_gene_id	H. sapiens	10039	H. sapiens	PARP3	poly(ADP-ribose) polymerase family member 3	GO:1905662 negative regulation of telomerase RNA reverse transcriptase activity;GO:0030592 DNA ADP-ribosylation;GO:1905661 regulation of telomerase RNA reverse transcriptase activity		FDA approved drug targets:Small molecule drugs; Predicted intracellular proteins	Nuclear bodies;Nucleoplasm (Supported)	2-methyl-3,5,7,8-tetrahydro-4H-thiopyrano[4,3-d]pyrimidin-4-one; 4-[3-(1,4-diazepan-1-ylcarbonyl)-4-fluorobenzyl]phthalazin-1(2H)-one; N~2~,N~2~-DIMETHYL-N~1~-(6-OXO-5,6-DIHYDROPHENANTHRIDIN-2-YL)GLYCINAMIDE; Olaparib; Rucaparib			0.0	1.0	0.0	0.0	0.0	1.0	0.0	0.0	1.0	0.0	0.0	1.0	0.0	0.0	0.0	0.0	0.0	0.0	0.0	1.0
ENSG00000108622.10	3384	ensembl_gene_id	H. sapiens	3384	H. sapiens	ICAM2	intercellular adhesion molecule 2	GO:0098609 cell-cell adhesion;GO:0007155 cell adhesion;GO:0022610 biological adhesion		Predicted intracellular proteins; CD markers	Plasma membrane (Approved); Additional: Cytosol		(M169)PID INTEGRIN2 PATHWAY	(M5915)HALLMARK APICAL JUNCTION	0.0	0.0	0.0	0.0	0.0	0.0	0.0	0.0	0.0	0.0	0.0	0.0	0.0	0.0	0.0	0.0	0.0	0.0	0.0	0.0
ENSG00000122515.14	83637	ensembl_gene_id	H. sapiens	83637	H. sapiens	ZMIZ2	zinc finger MIZ-type containing 2	GO:0045944 positive regulation of transcription by RNA polymerase II;GO:0045893 positive regulation of transcription, DNA-templated;GO:1903508 positive regulation of nucleic acid-templated transcription		Predicted intracellular proteins	Nucleoplasm (Supported); Additional: Mitochondria		(M151)PID AR TF PATHWAY		0.0	0.0	0.0	0.0	0.0	0.0	0.0	0.0	0.0	0.0	0.0	0.0	0.0	0.0	0.0	0.0	0.0	0.0	0.0	0.0
ENSG00000211951.2	28455	ensembl_gene_id	H. sapiens	28455	H. sapiens	IGHV2-26	immunoglobulin heavy variable 2-26	GO:0006910 phagocytosis, recognition;GO:0006958 complement activation, classical pathway;GO:0002455 humoral immune response mediated by circulating immunoglobulin		Predicted secreted proteins					1.0	1.0	0.0	0.0	0.0	0.0	0.0	0.0	0.0	0.0	0.0	0.0	0.0	0.0	0.0	0.0	0.0	0.0	0.0	0.0
ENSG00000161328.10	115399	ensembl_gene_id	H. sapiens	115399	H. sapiens	LRRC56	leucine rich repeat containing 56	GO:0030030 cell projection organization;GO:0016043 cellular component organization;GO:0071840 cellular component organization or biogenesis		Predicted intracellular proteins; Human disease related genes:Respiratory diseases:Tracheobronchial diseases; Disease related genes					0.0	0.0	0.0	0.0	0.0	0.0	0.0	0.0	0.0	0.0	0.0	0.0	0.0	0.0	0.0	0.0	0.0	0.0	0.0	0.0
ENSG00000103365.15	23062	ensembl_gene_id	H. sapiens	23062	H. sapiens	GGA2	golgi associated, gamma adaptin ear containing, ARF binding protein 2	GO:0043001 Golgi to plasma membrane protein transport;GO:0034394 protein localization to cell surface;GO:0061951 establishment of protein localization to plasma membrane		Predicted intracellular proteins	Golgi apparatus (Enhanced)			(M5924)HALLMARK MTORC1 SIGNALING	0.0	0.0	0.0	0.0	0.0	0.0	0.0	0.0	0.0	0.0	0.0	0.0	0.0	0.0	0.0	0.0	0.0	0.0	0.0	0.0
ENSG00000188735.12	144404	ensembl_gene_id	H. sapiens	144404	H. sapiens	TMEM120B	transmembrane protein 120B	GO:0051291 protein heterooligomerization;GO:0045444 fat cell differentiation;GO:0051259 protein complex oligomerization		Predicted intracellular proteins	Nucleoli fibrillar center (Approved); Additional: Cytosol				0.0	0.0	0.0	0.0	0.0	0.0	0.0	0.0	0.0	0.0	0.0	0.0	0.0	0.0	0.0	0.0	0.0	0.0	0.0	0.0
ENSG00000161405.16	22806	ensembl_gene_id	H. sapiens	22806	H. sapiens	IKZF3	IKAROS family zinc finger 3	GO:0045577 regulation of B cell differentiation;GO:0030888 regulation of B cell proliferation;GO:0007498 mesoderm development		Predicted intracellular proteins; Transcription factors:Zinc-coordinating DNA-binding domains	Nucleoplasm (Supported); Additional: Cytosol		(M122)PID IL2 1PATHWAY		0.0	1.0	0.0	0.0	1.0	0.0	1.0	0.0	0.0	0.0	0.0	0.0	0.0	0.0	0.0	0.0	0.0	0.0	0.0	0.0
ENSG00000111641.11	4839	ensembl_gene_id	H. sapiens	4839	H. sapiens	NOP2	NOP2 nucleolar protein	GO:0070475 rRNA base methylation;GO:0031167 rRNA methylation;GO:0000027 ribosomal large subunit assembly		Predicted intracellular proteins	Nucleoli (Enhanced)			(M5928)HALLMARK MYC TARGETS V2; (M5947)HALLMARK IL2 STAT5 SIGNALING	0.0	0.0	1.0	1.0	0.0	0.0	0.0	0.0	0.0	0.0	1.0	0.0	0.0	0.0	0.0	0.0	0.0	0.0	0.0	0.0
ENSG00000108773.10	2648	ensembl_gene_id	H. sapiens	2648	H. sapiens	KAT2A	lysine acetyltransferase 2A	GO:0106227 peptidyl-lysine glutarylation;GO:0071929 alpha-tubulin acetylation;GO:0018335 protein succinylation		Enzymes; Predicted intracellular proteins; ENZYME proteins:Transferases		Coenzyme A	(M139)PID MYC PATHWAY; (M40)PID E2F PATHWAY; (M66)PID MYC ACTIV PATHWAY	(M5903)HALLMARK NOTCH SIGNALING; (M5895)HALLMARK WNT BETA CATENIN SIGNALING	0.0	1.0	0.0	0.0	0.0	0.0	1.0	0.0	0.0	0.0	0.0	0.0	0.0	0.0	0.0	0.0	0.0	0.0	0.0	0.0
ENSG00000211946.3	28445	ensembl_gene_id	H. sapiens	28445	H. sapiens	IGHV3-20	immunoglobulin heavy variable 3-20	GO:0006910 phagocytosis, recognition;GO:0006958 complement activation, classical pathway;GO:0002455 humoral immune response mediated by circulating immunoglobulin		Predicted secreted proteins					1.0	1.0	0.0	0.0	0.0	0.0	0.0	0.0	0.0	0.0	0.0	0.0	0.0	0.0	0.0	0.0	0.0	0.0	0.0	0.0
ENSG00000179222.17	9500	ensembl_gene_id	H. sapiens	9500	H. sapiens	MAGED1	MAGE family member D1	GO:0090190 positive regulation of branching involved in ureteric bud morphogenesis;GO:0090189 regulation of branching involved in ureteric bud morphogenesis;GO:0090183 regulation of kidney development		Predicted intracellular proteins; Cancer-related genes:Candidate cancer biomarkers	Cytosol (Approved)		(M187)PID TRKR PATHWAY; (M153)PID P75 NTR PATHWAY		0.0	0.0	0.0	0.0	0.0	0.0	0.0	0.0	0.0	0.0	0.0	0.0	0.0	0.0	0.0	0.0	0.0	0.0	0.0	1.0
ENSG00000162894.11	9214	ensembl_gene_id	H. sapiens	9214	H. sapiens	FCMR	Fc mu receptor	GO:0006968 cellular defense response;GO:0043066 negative regulation of apoptotic process;GO:0043069 negative regulation of programmed cell death		Predicted secreted proteins; Predicted intracellular proteins	Cytosol;Focal adhesion sites (Approved); Additional: Nucleoplasm			(M5906)HALLMARK ESTROGEN RESPONSE EARLY	0.0	0.0	0.0	0.0	0.0	0.0	0.0	0.0	0.0	0.0	0.0	0.0	0.0	0.0	0.0	0.0	0.0	0.0	0.0	0.0
ENSG00000169857.7	57099	ensembl_gene_id	H. sapiens	57099	H. sapiens	AVEN	apoptosis and caspase activation inhibitor	GO:0010972 negative regulation of G2/M transition of mitotic cell cycle;GO:1902750 negative regulation of cell cycle G2/M phase transition;GO:0010389 regulation of G2/M transition of mitotic cell cycle		Predicted intracellular proteins	Actin filaments;Plasma membrane (Approved); Additional: Centrosome				0.0	0.0	0.0	0.0	0.0	0.0	0.0	0.0	0.0	0.0	0.0	0.0	0.0	0.0	0.0	0.0	0.0	0.0	0.0	0.0
ENSG00000102901.12	80152	ensembl_gene_id	H. sapiens	80152	H. sapiens	CENPT	centromere protein T	GO:0051382 kinetochore assembly;GO:0051383 kinetochore organization;GO:0034508 centromere complex assembly		Human disease related genes:Congenital malformations:Other congenital malformations; Predicted intracellular proteins; Disease related genes	Nuclear bodies (Supported); Additional: Nucleoplasm				0.0	0.0	1.0	0.0	0.0	0.0	0.0	0.0	0.0	0.0	0.0	0.0	0.0	0.0	0.0	0.0	0.0	0.0	0.0	0.0
ENSG00000107829.13	6468	ensembl_gene_id	H. sapiens	6468	H. sapiens	FBXW4	F-box and WD repeat domain containing 4	GO:0031146 SCF-dependent proteasomal ubiquitin-dependent protein catabolic process;GO:0030326 embryonic limb morphogenesis;GO:0035113 embryonic appendage morphogenesis		Predicted intracellular proteins; Disease related genes	Golgi apparatus (Approved)		(M5493)WNT SIGNALING		0.0	0.0	0.0	0.0	0.0	0.0	0.0	0.0	0.0	0.0	0.0	0.0	0.0	0.0	0.0	0.0	0.0	0.0	0.0	0.0
ENSG00000076554.15	7163	ensembl_gene_id	H. sapiens	7163	H. sapiens	TPD52	tumor protein D52	GO:0030183 B cell differentiation;GO:0042113 B cell activation;GO:0030098 lymphocyte differentiation		Predicted intracellular proteins; Cancer-related genes:Candidate cancer biomarkers	Cytosol (Approved); Additional: Golgi apparatus			(M5910)HALLMARK PROTEIN SECRETION; (M5908)HALLMARK ANDROGEN RESPONSE; (M5891)HALLMARK HYPOXIA	0.0	0.0	0.0	0.0	1.0	0.0	0.0	0.0	0.0	0.0	0.0	0.0	0.0	0.0	0.0	0.0	0.0	0.0	0.0	0.0
ENSG00000211674.2						None	None	None	None	None	None	None	None	None	nan	nan	nan	nan	nan	nan	nan	nan	nan	nan	nan	nan	nan	nan	nan	nan	nan	nan	nan	nan
ENSG00000090273.13	10726	ensembl_gene_id	H. sapiens	10726	H. sapiens	NUDC	nuclear distribution C, dynein complex regulator	GO:0007097 nuclear migration;GO:0051647 nucleus localization;GO:0007080 mitotic metaphase plate congression		Predicted intracellular proteins	Cytosol (Enhanced)	Phenethyl Isothiocyanate	(M163)PID LIS1 PATHWAY; (M129)PID PLK1 PATHWAY		0.0	0.0	0.0	0.0	0.0	0.0	0.0	0.0	0.0	0.0	0.0	0.0	0.0	0.0	0.0	0.0	0.0	0.0	0.0	0.0
ENSG00000189091.12	23450	ensembl_gene_id	H. sapiens	23450	H. sapiens	SF3B3	splicing factor 3b subunit 3	GO:0035521 monoubiquitinated histone deubiquitination;GO:0035522 monoubiquitinated histone H2A deubiquitination;GO:0035520 monoubiquitinated protein deubiquitination		Predicted intracellular proteins	Nucleoli;Nucleoli rim;Nucleoplasm (Supported)	Quercetin		(M5926)HALLMARK MYC TARGETS V1	0.0	0.0	0.0	1.0	0.0	0.0	0.0	0.0	0.0	0.0	0.0	0.0	0.0	0.0	0.0	0.0	0.0	0.0	0.0	0.0
ENSG00000232216.1	28426	ensembl_gene_id	H. sapiens	28426	H. sapiens	IGHV3-43	immunoglobulin heavy variable 3-43	GO:0006910 phagocytosis, recognition;GO:0006958 complement activation, classical pathway;GO:0002455 humoral immune response mediated by circulating immunoglobulin		Predicted secreted proteins					1.0	1.0	0.0	0.0	0.0	0.0	0.0	0.0	0.0	0.0	0.0	0.0	0.0	0.0	0.0	0.0	0.0	0.0	0.0	0.0
ENSG00000111674.8	2026	ensembl_gene_id	H. sapiens	2026	H. sapiens	ENO2	enolase 2	GO:0006735 NADH regeneration;GO:0061621 canonical glycolysis;GO:0061718 glucose catabolic process to pyruvate		Candidate cardiovascular disease genes; Cancer-related genes:Candidate cancer biomarkers; ENZYME proteins:Lyases; Enzymes; Predicted intracellular proteins	Cytosol;Plasma membrane (Supported)	2-Phosphoglycolic Acid		(M5935)HALLMARK FATTY ACID METABOLISM; (M5941)HALLMARK UV RESPONSE UP; (M5902)HALLMARK APOPTOSIS	0.0	0.0	0.0	0.0	0.0	0.0	0.0	0.0	0.0	1.0	0.0	0.0	0.0	0.0	1.0	0.0	0.0	0.0	0.0	0.0
ENSG00000140718.20	79068	ensembl_gene_id	H. sapiens	79068	H. sapiens	FTO	FTO alpha-ketoglutarate dependent dioxygenase	GO:0042245 RNA repair;GO:0070350 regulation of white fat cell proliferation;GO:0035552 oxidative single-stranded DNA demethylation		ENZYME proteins:Oxidoreductases; Human disease related genes:Endocrine and metabolic diseases:Other endocrine and metabolic diseases; Human disease related genes:Congenital malformations:Other congenital malformations; Disease related genes; Potential drug targets; Enzymes; Human disease related genes:Endocrine and metabolic diseases:Diabetes; Predicted intracellular proteins	Cytosol (Supported); Additional: Vesicles	Artenimol			0.0	0.0	0.0	0.0	0.0	1.0	0.0	0.0	1.0	0.0	1.0	1.0	0.0	0.0	0.0	0.0	0.0	0.0	0.0	0.0
ENSG00000162892.15	11009	ensembl_gene_id	H. sapiens	11009	H. sapiens	IL24	interleukin 24	GO:0042501 serine phosphorylation of STAT protein;GO:0071353 cellular response to interleukin-4;GO:0070670 response to interleukin-4		Predicted secreted proteins; Predicted intracellular proteins; Cancer-related genes:Candidate cancer biomarkers			(M196)PID IL23 PATHWAY; (M5883)NABA SECRETED FACTORS; (M5885)NABA MATRISOME ASSOCIATED		0.0	1.0	0.0	0.0	0.0	0.0	0.0	0.0	0.0	0.0	0.0	0.0	0.0	0.0	0.0	0.0	0.0	0.0	0.0	1.0
ENSG00000058453.16	9696	ensembl_gene_id	H. sapiens	9696	H. sapiens	CROCC	ciliary rootlet coiled-coil, rootletin	GO:0032053 ciliary basal body organization;GO:1903566 positive regulation of protein localization to cilium;GO:1903564 regulation of protein localization to cilium		Predicted intracellular proteins	Centrosome;Plasma membrane (Supported)			(M5916)HALLMARK APICAL SURFACE	0.0	0.0	0.0	0.0	0.0	0.0	0.0	0.0	0.0	0.0	0.0	0.0	0.0	0.0	0.0	1.0	0.0	0.0	0.0	0.0
ENSG00000211676.2						None	None	None	None	None	None	None	None	None	nan	nan	nan	nan	nan	nan	nan	nan	nan	nan	nan	nan	nan	nan	nan	nan	nan	nan	nan	nan
ENSG00000104731.13	54758	ensembl_gene_id	H. sapiens	54758	H. sapiens	KLHDC4	kelch domain containing 4			Predicted intracellular proteins	Nucleoli (Approved); Additional: Mitotic chromosome				0.0	0.0	0.0	0.0	0.0	0.0	0.0	0.0	0.0	0.0	0.0	0.0	0.0	0.0	0.0	0.0	0.0	0.0	0.0	0.0
ENSG00000198242.13	6147	ensembl_gene_id	H. sapiens	6147	H. sapiens	RPL23A	ribosomal protein L23a	GO:0000027 ribosomal large subunit assembly;GO:0042255 ribosome assembly;GO:0042273 ribosomal large subunit biogenesis		Ribosomal proteins; Predicted intracellular proteins	Cytosol;Endoplasmic reticulum;Nucleoli fibrillar center (Approved)	(S)-3-phenyllactic acid; Anisomycin; Puromycin; Artenimol			0.0	0.0	1.0	1.0	0.0	0.0	0.0	0.0	0.0	0.0	0.0	0.0	0.0	0.0	0.0	0.0	0.0	0.0	0.0	0.0
ENSG00000155660.10	9601	ensembl_gene_id	H. sapiens	9601	H. sapiens	PDIA4	protein disulfide isomerase family A member 4	GO:0061077 chaperone-mediated protein folding;GO:0009306 protein secretion;GO:0035592 establishment of protein localization to extracellular region		Enzymes; ENZYME proteins:Isomerase; Predicted intracellular proteins	Endoplasmic reticulum (Supported)				0.0	0.0	0.0	0.0	0.0	0.0	0.0	0.0	0.0	0.0	0.0	0.0	0.0	0.0	0.0	0.0	0.0	0.0	0.0	0.0
ENSG00000197694.15	6709	ensembl_gene_id	H. sapiens	6709	H. sapiens	SPTAN1	spectrin alpha, non-erythrocytic 1	GO:0051693 actin filament capping;GO:0030835 negative regulation of actin filament depolymerization;GO:0030834 regulation of actin filament depolymerization		Human disease related genes:Nervous system diseases:Epilepsy; Predicted intracellular proteins; Disease related genes	Microtubules;Vesicles (Approved)		(M220)PID CASPASE PATHWAY	(M5902)HALLMARK APOPTOSIS; (M5893)HALLMARK MITOTIC SPINDLE; (M5909)HALLMARK MYOGENESIS	0.0	0.0	0.0	1.0	0.0	0.0	0.0	0.0	0.0	0.0	0.0	0.0	0.0	0.0	0.0	0.0	0.0	0.0	0.0	0.0
ENSG00000172269.18	1798	ensembl_gene_id	H. sapiens	1798	H. sapiens	DPAGT1	dolichyl-phosphate N-acetylglucosaminephosphotransferase 1	GO:0019348 dolichol metabolic process;GO:0016093 polyprenol metabolic process;GO:0006047 UDP-N-acetylglucosamine metabolic process		ENZYME proteins:Transferases; Human disease related genes:Nervous system diseases:Other nervous and sensory system diseases; Disease related genes; Potential drug targets; Enzymes; Human disease related genes:Congenital disorders of metabolism:Congenital disorders of glycan/glycoprotein metabolism					0.0	0.0	0.0	0.0	0.0	0.0	0.0	0.0	0.0	0.0	0.0	0.0	0.0	0.0	1.0	0.0	0.0	0.0	0.0	0.0
ENSG00000124608.4	57505	ensembl_gene_id	H. sapiens	57505	H. sapiens	AARS2	alanyl-tRNA synthetase 2, mitochondrial	GO:0070143 mitochondrial alanyl-tRNA aminoacylation;GO:0006419 alanyl-tRNA aminoacylation;GO:0070127 tRNA aminoacylation for mitochondrial protein translation		ENZYME proteins:Ligase; Predicted intracellular proteins; Human disease related genes:Congenital disorders of metabolism:Congenital disorders of lipid/glycolipid metabolism; Cancer-related genes:Mutational cancer driver genes; Disease related genes; Potential drug targets; Enzymes; Human disease related genes:Nervous system diseases:Neurodegenerative diseases; Human disease related genes:Congenit…	Mitochondria (Enhanced)	Alanine			0.0	0.0	1.0	1.0	0.0	0.0	0.0	1.0	0.0	1.0	1.0	0.0	0.0	0.0	0.0	0.0	0.0	0.0	0.0	0.0
ENSG00000185324.21	8558	ensembl_gene_id	H. sapiens	8558	H. sapiens	CDK10	cyclin dependent kinase 10	GO:0007089 traversing start control point of mitotic cell cycle;GO:1902018 negative regulation of cilium assembly;GO:0120033 negative regulation of plasma membrane bounded cell projection assembly	CMGC Ser/Thr protein kinase family	Human disease related genes:Congenital malformations:Other congenital malformations; Kinases:CMGC Ser/Thr protein kinases; Disease related genes; Potential drug targets; Enzymes; Predicted intracellular proteins; ENZYME proteins:Transferases	Nucleoplasm (Supported); Additional: Midbody;Midbody ring				0.0	0.0	0.0	0.0	0.0	0.0	0.0	0.0	0.0	0.0	0.0	0.0	0.0	0.0	0.0	0.0	0.0	0.0	0.0	0.0
ENSG00000182866.16	3932	ensembl_gene_id	H. sapiens	3932	H. sapiens	LCK	LCK proto-oncogene, Src family tyrosine kinase	GO:0034116 positive regulation of heterotypic cell-cell adhesion;GO:0050862 positive regulation of T cell receptor signaling pathway;GO:0034114 regulation of heterotypic cell-cell adhesion	Tyr protein kinase family	Human disease related genes:Immune system diseases:Primary immunodeficiency; FDA approved drug targets:Small molecule drugs; Kinases:Tyr protein kinases; Cancer-related genes; Disease related genes; Enzymes; Predicted intracellular proteins; ENZYME proteins:Transferases	Golgi apparatus (Approved)	Dasatinib; AP-22408; Staurosporine; 1-Tert-Butyl-3-(4-Chloro-Phenyl)-1h-Pyrazolo[3,4-D]Pyrimidin-4-Ylamine; {4-[(2S)-2-Acetamido-3-({(1S)-1-[3-carbamoyl-4-(cyclohexylmethoxy)phenyl]ethyl}amino)-3-oxopropyl]-2-phosphonophenoxy}acetic acid; Phosphoaminophosphonic Acid-Adenylate Ester; 3-(2-AMINOQUINAZOLIN-6-YL)-4-METHYL-N-[3-(TRIFLUOROMETHYL)PHENYL]BENZAMIDE; 2,3-DIPHENYL-N-(2-PIPERAZIN-1-YLETHYL)F…	(M26)PID NFKAPPAB ATYPICAL PATHWAY; (M33)PID GLYPICAN 1PATHWAY; (M76)PID P38 ALPHA BETA PATHWAY	(M5923)HALLMARK PI3K AKT MTOR SIGNALING; (M5948)HALLMARK BILE ACID METABOLISM; (M5921)HALLMARK COMPLEMENT	0.0	1.0	0.0	0.0	1.0	0.0	1.0	0.0	0.0	0.0	0.0	0.0	0.0	1.0	0.0	0.0	1.0	0.0	0.0	0.0
ENSG00000167792.11	4723	ensembl_gene_id	H. sapiens	4723	H. sapiens	NDUFV1	NADH:ubiquinone oxidoreductase core subunit V1	GO:0006120 mitochondrial electron transport, NADH to ubiquinone;GO:0019646 aerobic electron transport chain;GO:0042773 ATP synthesis coupled electron transport		ENZYME proteins; Disease related genes; Potential drug targets; Enzymes; Predicted intracellular proteins; Human disease related genes:Congenital disorders of metabolism:Mitochondrial diseases	Mitochondria (Supported); Additional: Cytosol	NADH		(M5936)HALLMARK OXIDATIVE PHOSPHORYLATION	0.0	0.0	0.0	0.0	0.0	0.0	0.0	0.0	0.0	0.0	0.0	0.0	0.0	0.0	0.0	0.0	0.0	0.0	0.0	0.0
ENSG00000231475.3	28398	ensembl_gene_id	H. sapiens	28398	H. sapiens	IGHV4-30-2	immunoglobulin heavy variable 4-30-2			Predicted secreted proteins					0.0	0.0	0.0	0.0	0.0	0.0	0.0	0.0	0.0	0.0	0.0	0.0	0.0	0.0	0.0	0.0	0.0	0.0	0.0	0.0
ENSG00000185024.16	2972	ensembl_gene_id	H. sapiens	2972	H. sapiens	BRF1	BRF1 RNA polymerase III transcription initiation factor subunit	GO:0006384 transcription initiation from RNA polymerase III promoter;GO:0009304 tRNA transcription;GO:0045945 positive regulation of transcription by RNA polymerase III		Human disease related genes:Congenital malformations:Other congenital malformations; Predicted intracellular proteins; Disease related genes	Nucleoplasm (Approved); Additional: Nuclear bodies				0.0	0.0	0.0	0.0	0.0	0.0	0.0	0.0	0.0	0.0	0.0	0.0	0.0	0.0	0.0	0.0	0.0	0.0	0.0	0.0
ENSG00000077312.8	6626	ensembl_gene_id	H. sapiens	6626	H. sapiens	SNRPA	small nuclear ribonucleoprotein polypeptide A	GO:1900363 regulation of mRNA polyadenylation;GO:0031440 regulation of mRNA 3'-end processing;GO:0050684 regulation of mRNA processing		Predicted intracellular proteins	Nucleoplasm (Supported)	Malonic acid		(M5926)HALLMARK MYC TARGETS V1	0.0	0.0	0.0	1.0	0.0	0.0	0.0	0.0	0.0	0.0	0.0	0.0	0.0	0.0	0.0	0.0	0.0	0.0	0.0	0.0
ENSG00000234184.5	101927412	ensembl_gene_id	H. sapiens	101927412	H. sapiens	LINC01781	long intergenic non-protein coding RNA 1781								0.0	0.0	0.0	0.0	0.0	0.0	0.0	0.0	0.0	0.0	0.0	0.0	0.0	0.0	0.0	0.0	0.0	0.0	0.0	0.0
ENSG00000135469.13	93058	ensembl_gene_id	H. sapiens	93058	H. sapiens	COQ10A	coenzyme Q10A	GO:0006744 ubiquinone biosynthetic process;GO:1901663 quinone biosynthetic process;GO:0006743 ubiquinone metabolic process		Predicted intracellular proteins	Cytosol (Approved); Additional: Endoplasmic reticulum;Golgi apparatus				0.0	0.0	0.0	0.0	0.0	0.0	0.0	0.0	0.0	1.0	0.0	0.0	0.0	0.0	0.0	0.0	0.0	0.0	0.0	0.0
ENSG00000063180.8	770	ensembl_gene_id	H. sapiens	770	H. sapiens	CA11	carbonic anhydrase 11	GO:0006730 one-carbon metabolic process;GO:0044281 small molecule metabolic process;GO:0044237 cellular metabolic process		Predicted secreted proteins; Predicted intracellular proteins	Microtubules;Vesicles (Approved)	Zonisamide			0.0	0.0	0.0	0.0	0.0	0.0	0.0	0.0	0.0	0.0	0.0	0.0	0.0	0.0	0.0	0.0	0.0	0.0	0.0	0.0
ENSG00000223705.9	155400	ensembl_gene_id	H. sapiens	155400	H. sapiens	NSUN5P1	NSUN5 pseudogene 1	GO:0070475 rRNA base methylation;GO:0031167 rRNA methylation;GO:0000154 rRNA modification							0.0	0.0	1.0	0.0	0.0	0.0	0.0	0.0	0.0	0.0	1.0	0.0	0.0	0.0	0.0	0.0	0.0	0.0	0.0	0.0
ENSG00000001497.16	81887	ensembl_gene_id	H. sapiens	81887	H. sapiens	LAS1L	LAS1 like ribosome biogenesis factor	GO:0000470 maturation of LSU-rRNA;GO:0000460 maturation of 5.8S rRNA;GO:0042273 ribosomal large subunit biogenesis		Human disease related genes:Congenital malformations:Other congenital malformations; Predicted intracellular proteins; Disease related genes	Nucleoplasm (Approved); Additional: Centriolar satellite;Cytosol			(M5928)HALLMARK MYC TARGETS V2	0.0	0.0	1.0	1.0	0.0	0.0	0.0	0.0	0.0	0.0	0.0	0.0	0.0	0.0	0.0	0.0	0.0	0.0	0.0	0.0
ENSG00000096433.10	3710	ensembl_gene_id	H. sapiens	3710	H. sapiens	ITPR3	inositol 1,4,5-trisphosphate receptor type 3	GO:0050917 sensory perception of umami taste;GO:0050916 sensory perception of sweet taste;GO:0048016 inositol phosphate-mediated signaling		Human disease related genes:Endocrine and metabolic diseases:Diabetes	Vesicles (Uncertain)		(M1315)SIG PIP3 SIGNALING IN B LYMPHOCYTES; (M5193)SIG CHEMOTAXIS; (M8626)SIG BCR SIGNALING PATHWAY		0.0	0.0	0.0	0.0	1.0	0.0	0.0	0.0	0.0	0.0	0.0	0.0	0.0	0.0	0.0	0.0	0.0	0.0	0.0	0.0
ENSG00000130956.13	22927	ensembl_gene_id	H. sapiens	22927	H. sapiens	HABP4	hyaluronan binding protein 4	GO:0030578 PML body organization;GO:0030575 nuclear body organization;GO:0045948 positive regulation of translational initiation		Predicted intracellular proteins	Nuclear membrane (Supported); Additional: Cytosol	Hyaluronic acid			0.0	0.0	0.0	0.0	0.0	0.0	0.0	0.0	0.0	0.0	0.0	0.0	0.0	0.0	0.0	0.0	0.0	0.0	0.0	0.0
ENSG00000078246.16	7289	ensembl_gene_id	H. sapiens	7289	H. sapiens	TULP3	TUB like protein 3	GO:0021914 negative regulation of smoothened signaling pathway involved in ventral spinal cord patterning;GO:0060434 bronchus morphogenesis;GO:0060831 smoothened signaling pathway involved in dorsal/ventral neural tube patterning		Predicted intracellular proteins	Nucleoli;Nucleoplasm (Supported); Additional: Plasma membrane				0.0	0.0	0.0	0.0	0.0	0.0	0.0	0.0	0.0	0.0	0.0	0.0	0.0	0.0	0.0	0.0	0.0	0.0	0.0	0.0
ENSG00000103264.17	79791	ensembl_gene_id	H. sapiens	79791	H. sapiens	FBXO31	F-box protein 31	GO:0031145 anaphase-promoting complex-dependent catabolic process;GO:2001224 positive regulation of neuron migration;GO:0031571 mitotic G1 DNA damage checkpoint signaling		Predicted intracellular proteins; Human disease related genes:Other diseases:Mental and behavioural disorders; Disease related genes	Nucleoplasm (Approved); Additional: Cytosol;Golgi apparatus				0.0	0.0	0.0	0.0	0.0	0.0	0.0	0.0	1.0	0.0	0.0	0.0	0.0	0.0	0.0	0.0	0.0	0.0	0.0	0.0
ENSG00000243238.1	28919	ensembl_gene_id	H. sapiens	28919	H. sapiens	IGKV2-30	immunoglobulin kappa variable 2-30	GO:0002377 immunoglobulin production;GO:0002440 production of molecular mediator of immune response;GO:0002250 adaptive immune response		Predicted secreted proteins					1.0	0.0	0.0	0.0	0.0	0.0	0.0	0.0	0.0	0.0	0.0	0.0	0.0	0.0	0.0	0.0	0.0	0.0	0.0	0.0
ENSG00000106351.12	3268	ensembl_gene_id	H. sapiens	3268	H. sapiens	AGFG2	ArfGAP with FG repeats 2	GO:0050790 regulation of catalytic activity;GO:0065009 regulation of molecular function;GO:0065007 biological regulation		Predicted intracellular proteins	Cytosol (Approved); Additional: Nucleoplasm				0.0	0.0	0.0	0.0	0.0	0.0	0.0	0.0	0.0	0.0	0.0	0.0	0.0	0.0	0.0	0.0	0.0	0.0	0.0	0.0
ENSG00000063177.12	6141	ensembl_gene_id	H. sapiens	6141	H. sapiens	RPL18	ribosomal protein L18	GO:0002181 cytoplasmic translation;GO:0006412 translation;GO:0043043 peptide biosynthetic process		Human disease related genes:Other congenital disorders:Ribosomopathies; Human disease related genes:Cardiovascular diseases:Hematologic diseases; Ribosomal proteins; Disease related genes; Predicted intracellular proteins	Cytosol;Endoplasmic reticulum (Supported); Additional: Nucleoli	Artenimol		(M5926)HALLMARK MYC TARGETS V1; (M5939)HALLMARK P53 PATHWAY	0.0	0.0	0.0	1.0	0.0	0.0	0.0	0.0	0.0	0.0	0.0	0.0	0.0	0.0	0.0	0.0	0.0	0.0	0.0	0.0
ENSG00000177272.8	3738	ensembl_gene_id	H. sapiens	3738	H. sapiens	KCNA3	potassium voltage-gated channel subfamily A member 3	GO:0071805 potassium ion transmembrane transport;GO:0006813 potassium ion transport;GO:0051260 protein homooligomerization		Transporters:Transporter channels and pores; FDA approved drug targets:Small molecule drugs; Voltage-gated ion channels:Voltage-Gated Potassium Channels		Clofazimine; Dalfampridine		(M5932)HALLMARK INFLAMMATORY RESPONSE	0.0	0.0	0.0	0.0	0.0	0.0	0.0	0.0	0.0	0.0	0.0	0.0	0.0	0.0	0.0	0.0	0.0	0.0	0.0	0.0
ENSG00000168488.18	11273	ensembl_gene_id	H. sapiens	11273	H. sapiens	ATXN2L	ataxin 2 like	GO:0034063 stress granule assembly;GO:0140694 non-membrane-bounded organelle assembly;GO:0016071 mRNA metabolic process		Predicted intracellular proteins	Cytosol (Enhanced)				0.0	0.0	1.0	0.0	0.0	0.0	0.0	0.0	0.0	0.0	0.0	0.0	0.0	0.0	0.0	0.0	0.0	1.0	0.0	0.0
ENSG00000174775.16	3265	ensembl_gene_id	H. sapiens	3265	H. sapiens	HRAS	HRas proto-oncogene, GTPase	GO:2000630 positive regulation of miRNA metabolic process;GO:0098696 regulation of neurotransmitter receptor localization to postsynaptic specialization membrane;GO:2000628 regulation of miRNA metabolic process		Cancer-related genes:Mutated cancer genes; Cancer-related genes:Candidate cancer biomarkers; Human disease related genes:Cancers:Cancers of soft tissues and bone; ENZYME proteins:Hydrolases; Human disease related genes:Cancers:Cancers of endocrine organs; Human disease related genes:Cancers:Cancers of male genital organs; Cancer-related genes:Mutational cancer driver genes; Human disease related …	Cytosol;Nucleoplasm (Approved)	Hexane-1,6-Diol; Trifluoroethanol; Guanosine-5'-Triphosphate; Guanosine-5'-Diphosphate; N,N'-DIMETHYL-N-(ACETYL)-N'-(7-NITROBENZ-2-OXA-1,3-DIAZOL-4-YL)ETHYLENEDIAMINE	(M134)PID TCR RAS PATHWAY; (M18895)SA TRKA RECEPTOR; (M17200)SA B CELL RECEPTOR COMPLEXES	(M5949)HALLMARK PEROXISOME; (M5923)HALLMARK PI3K AKT MTOR SIGNALING; (M5915)HALLMARK APICAL JUNCTION	1.0	1.0	0.0	1.0	1.0	0.0	0.0	0.0	0.0	0.0	0.0	0.0	0.0	1.0	0.0	0.0	0.0	0.0	0.0	1.0
ENSG00000122140.10	51116	ensembl_gene_id	H. sapiens	51116	H. sapiens	MRPS2	mitochondrial ribosomal protein S2	GO:0061668 mitochondrial ribosome assembly;GO:0032543 mitochondrial translation;GO:0042255 ribosome assembly		Ribosomal proteins; Predicted intracellular proteins; Disease related genes; Human disease related genes:Congenital disorders of metabolism:Mitochondrial diseases	Mitochondria (Supported)				0.0	0.0	1.0	1.0	0.0	0.0	0.0	0.0	0.0	0.0	0.0	0.0	0.0	0.0	0.0	0.0	0.0	0.0	0.0	0.0
ENSG00000105369.9	973	ensembl_gene_id	H. sapiens	973	H. sapiens	CD79A	CD79a molecule	GO:0042100 B cell proliferation;GO:0046651 lymphocyte proliferation;GO:0032943 mononuclear cell proliferation		Human disease related genes:Immune system diseases:Primary immunodeficiency; CD markers; Human disease related genes:Cancers:Cancers of haematopoietic and lymphoid tissues; Disease related genes; Predicted intracellular proteins; Cancer-related genes			(M10)PID BCR 5PATHWAY	(M5950)HALLMARK ALLOGRAFT REJECTION	1.0	1.0	0.0	0.0	1.0	0.0	0.0	0.0	0.0	0.0	0.0	0.0	0.0	0.0	0.0	0.0	0.0	0.0	0.0	0.0
ENSG00000120896.13	10174	ensembl_gene_id	H. sapiens	10174	H. sapiens	SORBS3	sorbin and SH3 domain containing 3	GO:0051496 positive regulation of stress fiber assembly;GO:0032233 positive regulation of actin filament bundle assembly;GO:0051492 regulation of stress fiber assembly		Predicted intracellular proteins	Cytosol (Uncertain); Additional: Focal adhesion sites			(M5909)HALLMARK MYOGENESIS; (M5915)HALLMARK APICAL JUNCTION	0.0	0.0	0.0	0.0	0.0	0.0	0.0	0.0	0.0	0.0	0.0	0.0	0.0	0.0	0.0	0.0	0.0	0.0	0.0	0.0
ENSG00000198286.9	84433	ensembl_gene_id	H. sapiens	84433	H. sapiens	CARD11	caspase recruitment domain family member 11	GO:0038202 TORC1 signaling;GO:0046710 GDP metabolic process;GO:0050862 positive regulation of T cell receptor signaling pathway		Human disease related genes:Immune system diseases:Primary immunodeficiency; Cancer-related genes:Mutated cancer genes; Human disease related genes:Cancers:Cancers of haematopoietic and lymphoid tissues; Disease related genes; Predicted intracellular proteins			(M88)PID CD8 TCR PATHWAY; (M10)PID BCR 5PATHWAY; (M34)PID TCR PATHWAY		0.0	1.0	0.0	0.0	1.0	0.0	1.0	0.0	0.0	0.0	0.0	0.0	0.0	1.0	1.0	0.0	0.0	0.0	0.0	0.0
ENSG00000213930.11	2592	ensembl_gene_id	H. sapiens	2592	H. sapiens	GALT	galactose-1-phosphate uridylyltransferase	GO:0006258 UDP-glucose catabolic process;GO:0009227 nucleotide-sugar catabolic process;GO:0033499 galactose catabolic process via UDP-galactose		Human disease related genes:Congenital disorders of metabolism:Congenital disorders of carbohydrate metabolism; Disease related genes; Potential drug targets; Enzymes; Predicted intracellular proteins; ENZYME proteins:Transferases	Cytosol (Approved)				0.0	0.0	0.0	0.0	0.0	0.0	0.0	0.0	0.0	0.0	0.0	1.0	0.0	0.0	1.0	0.0	0.0	0.0	0.0	0.0
ENSG00000135925.8	80326	ensembl_gene_id	H. sapiens	80326	H. sapiens	WNT10A	Wnt family member 10A	GO:0048733 sebaceous gland development;GO:0042487 regulation of odontogenesis of dentin-containing tooth;GO:0042481 regulation of odontogenesis		Human disease related genes:Digestive system diseases:Mouth and dental diseases; Predicted secreted proteins; Human disease related genes:Congenital malformations:Congenital malformations of skin; Disease related genes; Predicted intracellular proteins			(M5493)WNT SIGNALING; (M5883)NABA SECRETED FACTORS; (M5885)NABA MATRISOME ASSOCIATED		0.0	0.0	0.0	0.0	0.0	0.0	0.0	0.0	0.0	0.0	0.0	0.0	0.0	0.0	0.0	0.0	0.0	0.0	0.0	0.0
ENSG00000138074.14	8884	ensembl_gene_id	H. sapiens	8884	H. sapiens	SLC5A6	solute carrier family 5 member 6	GO:0015887 pantothenate transmembrane transport;GO:1904200 iodide transmembrane transport;GO:1905135 biotin import across plasma membrane		Transporters:Electrochemical Potential-driven transporters; Predicted intracellular proteins	Plasma membrane (Approved)	Lipoic acid		(M5905)HALLMARK ADIPOGENESIS	0.0	0.0	0.0	0.0	0.0	0.0	0.0	0.0	0.0	0.0	0.0	0.0	0.0	0.0	0.0	0.0	0.0	0.0	0.0	0.0
ENSG00000162004.16	124093	ensembl_gene_id	H. sapiens	124093	H. sapiens	CCDC78	coiled-coil domain containing 78	GO:0097742 de novo centriole assembly;GO:0098535 de novo centriole assembly involved in multi-ciliated epithelial cell differentiation;GO:1903251 multi-ciliated epithelial cell differentiation		Predicted intracellular proteins; Human disease related genes:Musculoskeletal diseases:Muscular diseases; Disease related genes					0.0	0.0	1.0	0.0	0.0	0.0	0.0	0.0	0.0	0.0	0.0	0.0	0.0	0.0	0.0	0.0	0.0	0.0	0.0	0.0
ENSG00000071894.16	29894	ensembl_gene_id	H. sapiens	29894	H. sapiens	CPSF1	cleavage and polyadenylation specific factor 1	GO:0098789 pre-mRNA cleavage required for polyadenylation;GO:0098787 mRNA cleavage involved in mRNA processing;GO:0006379 mRNA cleavage		Predicted intracellular proteins; Disease related genes	Nucleoplasm (Enhanced)				0.0	0.0	0.0	1.0	0.0	0.0	0.0	0.0	0.0	0.0	0.0	0.0	0.0	0.0	0.0	0.0	0.0	0.0	0.0	0.0
ENSG00000139641.12	23344	ensembl_gene_id	H. sapiens	23344	H. sapiens	ESYT1	extended synaptotagmin 1	GO:0061817 endoplasmic reticulum-plasma membrane tethering;GO:0051643 endoplasmic reticulum localization;GO:0140056 organelle localization by membrane tethering		Transporters; Predicted intracellular proteins	Endoplasmic reticulum (Supported)			(M5905)HALLMARK ADIPOGENESIS	0.0	0.0	0.0	0.0	0.0	0.0	0.0	0.0	0.0	0.0	0.0	0.0	0.0	0.0	0.0	0.0	0.0	0.0	0.0	0.0
ENSG00000240382.3	28937	ensembl_gene_id	H. sapiens	28937	H. sapiens	IGKV1-17	immunoglobulin kappa variable 1-17	GO:0002377 immunoglobulin production;GO:0002440 production of molecular mediator of immune response;GO:0002250 adaptive immune response		Predicted secreted proteins					1.0	0.0	0.0	0.0	0.0	0.0	0.0	0.0	0.0	0.0	0.0	0.0	0.0	0.0	0.0	0.0	0.0	0.0	0.0	0.0
ENSG00000168056.15	4054	ensembl_gene_id	H. sapiens	4054	H. sapiens	LTBP3	latent transforming growth factor beta binding protein 3	GO:0036363 transforming growth factor beta activation;GO:2000741 positive regulation of mesenchymal stem cell differentiation;GO:1902462 positive regulation of mesenchymal stem cell proliferation		Predicted secreted proteins; Human disease related genes:Digestive system diseases:Mouth and dental diseases; Predicted intracellular proteins; Disease related genes			(M3008)NABA ECM GLYCOPROTEINS; (M5884)NABA CORE MATRISOME; (M5889)NABA MATRISOME		0.0	0.0	0.0	0.0	0.0	0.0	0.0	0.0	0.0	0.0	0.0	0.0	0.0	0.0	0.0	0.0	0.0	0.0	0.0	0.0
ENSG00000261236.7	23246	ensembl_gene_id	H. sapiens	23246	H. sapiens	BOP1	BOP1 ribosomal biogenesis factor	GO:0000448 cleavage in ITS2 between 5.8S rRNA and LSU-rRNA of tricistronic rRNA transcript (SSU-rRNA, 5.8S rRNA, LSU-rRNA);GO:0000463 maturation of LSU-rRNA from tricistronic rRNA transcript (SSU-rRNA, 5.8S rRNA, LSU-rRNA);GO:0000478 endonucleolytic cleavage involved in rRNA processing		Predicted intracellular proteins	Nucleoli;Nucleoli rim (Enhanced); Additional: Mitotic chromosome;Nucleoplasm				0.0	0.0	1.0	1.0	0.0	0.0	0.0	0.0	0.0	0.0	0.0	0.0	0.0	0.0	0.0	0.0	0.0	0.0	0.0	0.0
ENSG00000099797.13	9524	ensembl_gene_id	H. sapiens	9524	H. sapiens	TECR	trans-2,3-enoyl-CoA reductase	GO:0030497 fatty acid elongation;GO:0042761 very long-chain fatty acid biosynthetic process;GO:0035338 long-chain fatty-acyl-CoA biosynthetic process		Human disease related genes:Other diseases:Mental and behavioural disorders; ENZYME proteins:Oxidoreductases; Disease related genes; Potential drug targets; Enzymes	Endoplasmic reticulum (Supported)				0.0	0.0	0.0	1.0	0.0	0.0	0.0	0.0	0.0	1.0	0.0	0.0	0.0	0.0	1.0	0.0	0.0	0.0	0.0	0.0
ENSG00000266967.6	80755	ensembl_gene_id	H. sapiens	80755	H. sapiens	AARSD1	alanyl-tRNA synthetase domain containing 1	GO:0006419 alanyl-tRNA aminoacylation;GO:0106074 aminoacyl-tRNA metabolism involved in translational fidelity;GO:0006450 regulation of translational fidelity		Predicted intracellular proteins	Cytosol;Nuclear membrane (Approved)				0.0	0.0	1.0	1.0	0.0	0.0	0.0	1.0	0.0	1.0	0.0	0.0	0.0	0.0	0.0	0.0	0.0	0.0	0.0	0.0
ENSG00000196405.12	51466	ensembl_gene_id	H. sapiens	51466	H. sapiens	EVL	Enah/Vasp-like	GO:1900028 negative regulation of ruffle assembly;GO:0045010 actin nucleation;GO:1900027 regulation of ruffle assembly		Predicted intracellular proteins	Cytosol;Vesicles (Approved)			(M5915)HALLMARK APICAL JUNCTION	0.0	0.0	0.0	1.0	0.0	0.0	0.0	0.0	0.0	0.0	0.0	0.0	0.0	1.0	0.0	0.0	0.0	0.0	0.0	0.0
ENSG00000237424.1	84793	ensembl_gene_id	H. sapiens	84793	H. sapiens	FOXD2-AS1	FOXD2 adjacent opposite strand RNA 1								0.0	0.0	0.0	0.0	0.0	0.0	0.0	0.0	0.0	0.0	0.0	0.0	0.0	0.0	0.0	0.0	0.0	0.0	0.0	0.0
ENSG00000154930.14	84532	ensembl_gene_id	H. sapiens	84532	H. sapiens	ACSS1	acyl-CoA synthetase short chain family member 1	GO:0019413 acetate biosynthetic process;GO:0019542 propionate biosynthetic process;GO:0006083 acetate metabolic process		Enzymes; ENZYME proteins:Ligase; Predicted intracellular proteins		ATP	(M32)PID HDAC CLASSIII PATHWAY	(M5935)HALLMARK FATTY ACID METABOLISM	0.0	0.0	0.0	1.0	0.0	0.0	0.0	0.0	0.0	1.0	0.0	0.0	0.0	0.0	1.0	0.0	0.0	0.0	0.0	0.0
ENSG00000087087.18	51593	ensembl_gene_id	H. sapiens	51593	H. sapiens	SRRT	serrate, RNA effector molecule	GO:0031053 primary miRNA processing;GO:0097150 neuronal stem cell population maintenance;GO:0035196 production of miRNAs involved in gene silencing by miRNA		Predicted intracellular proteins	Nucleoplasm (Enhanced)				0.0	0.0	1.0	1.0	0.0	0.0	0.0	0.0	0.0	0.0	0.0	0.0	0.0	0.0	0.0	0.0	0.0	0.0	0.0	0.0
ENSG00000089737.16	57062	ensembl_gene_id	H. sapiens	57062	H. sapiens	DDX24	DEAD-box helicase 24	GO:0016070 RNA metabolic process;GO:0090304 nucleic acid metabolic process;GO:0006139 nucleobase-containing compound metabolic process		Enzymes; ENZYME proteins:Hydrolases; Predicted intracellular proteins	Cytosol;Nucleoli (Approved)				0.0	0.0	0.0	0.0	0.0	0.0	0.0	0.0	0.0	0.0	0.0	0.0	0.0	0.0	0.0	0.0	0.0	0.0	0.0	0.0
ENSG00000137054.15	64425	ensembl_gene_id	H. sapiens	64425	H. sapiens	POLR1E	RNA polymerase I subunit E	GO:0042790 nucleolar large rRNA transcription by RNA polymerase I;GO:0006362 transcription elongation from RNA polymerase I promoter;GO:0001188 RNA polymerase I preinitiation complex assembly		Predicted intracellular proteins; RNA polymerase related proteins	Nucleoli fibrillar center;Nucleoplasm (Supported)				0.0	0.0	0.0	0.0	0.0	0.0	0.0	0.0	0.0	0.0	0.0	0.0	0.0	0.0	0.0	0.0	0.0	0.0	0.0	0.0
ENSG00000105372.6	6223	ensembl_gene_id	H. sapiens	6223	H. sapiens	RPS19	ribosomal protein S19	GO:0060265 positive regulation of respiratory burst involved in inflammatory response;GO:0060266 negative regulation of respiratory burst involved in inflammatory response;GO:0060268 negative regulation of respiratory burst		Human disease related genes:Other congenital disorders:Ribosomopathies; Human disease related genes:Cardiovascular diseases:Hematologic diseases; Ribosomal proteins; Disease related genes; Predicted intracellular proteins	Nucleoplasm (Supported)	Artenimol		(M5950)HALLMARK ALLOGRAFT REJECTION	0.0	1.0	1.0	1.0	0.0	0.0	0.0	0.0	0.0	0.0	0.0	0.0	0.0	0.0	0.0	1.0	0.0	0.0	0.0	0.0
ENSG00000273962.1	28916	ensembl_gene_id	H. sapiens	28916	H. sapiens	IGKV2-40	immunoglobulin kappa variable 2-40	GO:0002377 immunoglobulin production;GO:0002440 production of molecular mediator of immune response;GO:0002250 adaptive immune response		Predicted secreted proteins; Predicted intracellular proteins					1.0	0.0	0.0	0.0	0.0	0.0	0.0	0.0	0.0	0.0	0.0	0.0	0.0	0.0	0.0	0.0	0.0	0.0	0.0	0.0
ENSG00000101361.16	10528	ensembl_gene_id	H. sapiens	10528	H. sapiens	NOP56	NOP56 ribonucleoprotein	GO:0006364 rRNA processing;GO:0016072 rRNA metabolic process;GO:0042254 ribosome biogenesis		Predicted intracellular proteins; Human disease related genes:Nervous system diseases:Neurodegenerative diseases; Disease related genes	Nucleoli fibrillar center (Enhanced)			(M5928)HALLMARK MYC TARGETS V2; (M5922)HALLMARK UNFOLDED PROTEIN RESPONSE; (M5925)HALLMARK E2F TARGETS	0.0	0.0	1.0	1.0	0.0	0.0	0.0	0.0	0.0	0.0	0.0	0.0	0.0	0.0	0.0	0.0	0.0	0.0	0.0	0.0
ENSG00000211669.2	28803	ensembl_gene_id	H. sapiens	28803	H. sapiens	IGLV3-10	immunoglobulin lambda variable 3-10	GO:0002377 immunoglobulin production;GO:0002440 production of molecular mediator of immune response;GO:0002250 adaptive immune response		Predicted secreted proteins					1.0	0.0	0.0	0.0	0.0	0.0	0.0	0.0	0.0	0.0	0.0	0.0	0.0	0.0	0.0	0.0	0.0	0.0	0.0	0.0
ENSG00000224041.3	28875	ensembl_gene_id	H. sapiens	28875	H. sapiens	IGKV3D-15	immunoglobulin kappa variable 3D-15	GO:0002377 immunoglobulin production;GO:0002440 production of molecular mediator of immune response;GO:0002250 adaptive immune response		Predicted secreted proteins					1.0	0.0	0.0	0.0	0.0	0.0	0.0	0.0	0.0	0.0	0.0	0.0	0.0	0.0	0.0	0.0	0.0	0.0	0.0	0.0
ENSG00000100908.13	51016	ensembl_gene_id	H. sapiens	51016	H. sapiens	EMC9	ER membrane protein complex subunit 9	GO:0045050 protein insertion into ER membrane by stop-transfer membrane-anchor sequence;GO:0071816 tail-anchored membrane protein insertion into ER membrane;GO:0045048 protein insertion into ER membrane		Transporters:Primary Active Transporters; Predicted intracellular proteins					0.0	1.0	0.0	0.0	0.0	0.0	0.0	0.0	0.0	0.0	0.0	0.0	0.0	0.0	0.0	0.0	0.0	0.0	0.0	0.0
ENSG00000222037.5	3542	ensembl_gene_id	H. sapiens	3542	H. sapiens	IGLC6	immunoglobulin lambda constant 6	GO:0006910 phagocytosis, recognition;GO:0006958 complement activation, classical pathway;GO:0002455 humoral immune response mediated by circulating immunoglobulin							1.0	1.0	0.0	0.0	0.0	0.0	0.0	0.0	0.0	0.0	0.0	0.0	0.0	0.0	0.0	0.0	0.0	0.0	0.0	0.0
ENSG00000198832.10	140606	ensembl_gene_id	H. sapiens	140606	H. sapiens	SELENOM	selenoprotein M	GO:0035934 corticosterone secretion;GO:0035930 corticosteroid hormone secretion;GO:0035933 glucocorticoid secretion		Predicted intracellular proteins	Cytosol;Nucleoplasm (Approved)				0.0	0.0	0.0	0.0	0.0	0.0	0.0	0.0	0.0	0.0	0.0	0.0	0.0	0.0	0.0	0.0	0.0	0.0	0.0	0.0
ENSG00000148335.14	28989	ensembl_gene_id	H. sapiens	28989	H. sapiens	NTMT1	N-terminal Xaa-Pro-Lys N-methyltransferase 1	GO:0018011 N-terminal peptidyl-alanine methylation;GO:0018194 peptidyl-alanine modification;GO:0018012 N-terminal peptidyl-alanine trimethylation		Enzymes; Predicted intracellular proteins; ENZYME proteins:Transferases	Nucleoplasm (Enhanced); Additional: Cytosol				0.0	0.0	0.0	0.0	0.0	0.0	0.0	0.0	0.0	0.0	1.0	0.0	0.0	0.0	0.0	0.0	0.0	0.0	0.0	0.0
ENSG00000254093.8	54984	ensembl_gene_id	H. sapiens	54984	H. sapiens	PINX1	PIN2 (TERF1) interacting telomerase inhibitor 1	GO:1904744 positive regulation of telomeric DNA binding;GO:1904742 regulation of telomeric DNA binding;GO:1904751 positive regulation of protein localization to nucleolus		Predicted intracellular proteins	Nucleoli, Nuclear speckles (Supported, Approved); Additional: Mitochondria;Nucleoplasm, Golgi apparatus		(M105)PID TELOMERASE PATHWAY		0.0	0.0	0.0	0.0	0.0	0.0	0.0	0.0	1.0	0.0	0.0	0.0	0.0	0.0	0.0	0.0	0.0	0.0	0.0	0.0
ENSG00000133056.13	5287	ensembl_gene_id	H. sapiens	5287	H. sapiens	PIK3C2B	phosphatidylinositol-4-phosphate 3-kinase catalytic subunit type 2 beta	GO:0036092 phosphatidylinositol-3-phosphate biosynthetic process;GO:0014065 phosphatidylinositol 3-kinase signaling;GO:0046854 phosphatidylinositol phosphate biosynthetic process		Enzymes; Predicted intracellular proteins; ENZYME proteins:Transferases	Nucleoplasm (Approved); Additional: Cytosol	Fostamatinib	(M231)PID KIT PATHWAY		0.0	0.0	0.0	0.0	0.0	0.0	0.0	0.0	0.0	0.0	0.0	0.0	0.0	0.0	0.0	0.0	0.0	0.0	0.0	0.0
ENSG00000160408.14	30815	ensembl_gene_id	H. sapiens	30815	H. sapiens	ST6GALNAC6	ST6 N-acetylgalactosaminide alpha-2,6-sialyltransferase 6	GO:0006677 glycosylceramide metabolic process;GO:0001574 ganglioside biosynthetic process;GO:0097503 sialylation		Predicted intracellular proteins					0.0	1.0	0.0	1.0	0.0	0.0	0.0	0.0	0.0	0.0	0.0	0.0	0.0	0.0	0.0	0.0	0.0	0.0	0.0	0.0
ENSG00000104783.11	3783	ensembl_gene_id	H. sapiens	3783	H. sapiens	KCNN4	potassium calcium-activated channel subfamily N member 4	GO:0046541 saliva secretion;GO:0050862 positive regulation of T cell receptor signaling pathway;GO:0030322 stabilization of membrane potential		Voltage-gated ion channels:Calcium-Activated Potassium Channels; FDA approved drug targets:Small molecule drugs; Human disease related genes:Cardiovascular diseases:Hematologic diseases; Disease related genes; Transporters:Transporter channels and pores; Predicted intracellular proteins	Cytosol;Plasma membrane (Approved)	Clotrimazole; Quinine; Halothane		(M5953)HALLMARK KRAS SIGNALING UP	0.0	1.0	0.0	0.0	0.0	0.0	1.0	0.0	0.0	0.0	0.0	0.0	0.0	0.0	0.0	0.0	0.0	0.0	0.0	0.0
ENSG00000254098.1	28922	ensembl_gene_id	H. sapiens	28922	H. sapiens	IGKV2-26	immunoglobulin kappa variable 2-26 (pseudogene)								0.0	0.0	0.0	0.0	0.0	0.0	0.0	0.0	0.0	0.0	0.0	0.0	0.0	0.0	0.0	0.0	0.0	0.0	0.0	0.0
ENSG00000243264.2	28882	ensembl_gene_id	H. sapiens	28882	H. sapiens	IGKV2D-29	immunoglobulin kappa variable 2D-29	GO:0002377 immunoglobulin production;GO:0002440 production of molecular mediator of immune response;GO:0002250 adaptive immune response		Predicted secreted proteins; Predicted intracellular proteins					1.0	0.0	0.0	0.0	0.0	0.0	0.0	0.0	0.0	0.0	0.0	0.0	0.0	0.0	0.0	0.0	0.0	0.0	0.0	0.0
ENSG00000159685.10	84303	ensembl_gene_id	H. sapiens	84303	H. sapiens	CHCHD6	coiled-coil-helix-coiled-coil-helix domain containing 6	GO:0042407 cristae formation;GO:0007007 inner mitochondrial membrane organization;GO:0007006 mitochondrial membrane organization		Predicted intracellular proteins	Mitochondria (Supported)				0.0	1.0	0.0	0.0	0.0	0.0	0.0	0.0	1.0	0.0	0.0	0.0	0.0	0.0	0.0	0.0	0.0	0.0	0.0	0.0
ENSG00000188846.13	9045	ensembl_gene_id	H. sapiens	9045	H. sapiens	RPL14	ribosomal protein L14	GO:0042273 ribosomal large subunit biogenesis;GO:0002181 cytoplasmic translation;GO:0006364 rRNA processing		Ribosomal proteins; Predicted intracellular proteins	Cytosol;Endoplasmic reticulum (Supported)	Artenimol		(M5926)HALLMARK MYC TARGETS V1	0.0	0.0	1.0	1.0	0.0	0.0	0.0	0.0	0.0	0.0	0.0	0.0	0.0	0.0	0.0	0.0	0.0	0.0	0.0	0.0
ENSG00000115902.10	6509	ensembl_gene_id	H. sapiens	6509	H. sapiens	SLC1A4	solute carrier family 1 member 4	GO:0015826 threonine transport;GO:0034589 hydroxyproline transport;GO:0098718 serine import across plasma membrane		Transporters:Electrochemical Potential-driven transporters; Human disease related genes:Congenital malformations:Congenital malformations of the nervous system; Disease related genes; Potential drug targets	Centrosome (Enhanced)	Alanine		(M5922)HALLMARK UNFOLDED PROTEIN RESPONSE; (M5906)HALLMARK ESTROGEN RESPONSE EARLY; (M5907)HALLMARK ESTROGEN RESPONSE LATE	0.0	0.0	0.0	0.0	0.0	0.0	0.0	0.0	0.0	0.0	0.0	0.0	0.0	0.0	0.0	0.0	0.0	0.0	0.0	0.0
ENSG00000137073.21	55833	ensembl_gene_id	H. sapiens	55833	H. sapiens	UBAP2	ubiquitin associated protein 2	GO:0010468 regulation of gene expression;GO:0060255 regulation of macromolecule metabolic process;GO:0019222 regulation of metabolic process		Predicted intracellular proteins	Cytosol (Approved)				0.0	0.0	0.0	0.0	0.0	0.0	0.0	0.0	0.0	0.0	0.0	0.0	0.0	0.0	0.0	0.0	0.0	0.0	0.0	0.0
ENSG00000160856.20	115352	ensembl_gene_id	H. sapiens	115352	H. sapiens	FCRL3	Fc receptor like 3	GO:1905184 positive regulation of protein serine/threonine phosphatase activity;GO:0050859 negative regulation of B cell receptor signaling pathway;GO:0034163 regulation of toll-like receptor 9 signaling pathway		Predicted intracellular proteins; CD markers; Disease related genes					0.0	1.0	0.0	0.0	0.0	0.0	1.0	0.0	0.0	0.0	0.0	0.0	0.0	0.0	0.0	0.0	0.0	1.0	0.0	0.0
ENSG00000079616.12	3835	ensembl_gene_id	H. sapiens	3835	H. sapiens	KIF22	kinesin family member 22	GO:0007062 sister chromatid cohesion;GO:0007080 mitotic metaphase plate congression;GO:0051310 metaphase plate congression		Human disease related genes:Congenital malformations:Congenital malformations of the musculoskeletal system; Predicted intracellular proteins; Disease related genes	Nuclear speckles (Supported)			(M5893)HALLMARK MITOTIC SPINDLE; (M5901)HALLMARK G2M CHECKPOINT; (M5925)HALLMARK E2F TARGETS	0.0	0.0	0.0	0.0	0.0	0.0	0.0	0.0	1.0	0.0	0.0	0.0	0.0	0.0	0.0	0.0	0.0	0.0	0.0	0.0
ENSG00000187961.13	339451	ensembl_gene_id	H. sapiens	339451	H. sapiens	KLHL17	kelch like family member 17	GO:0030036 actin cytoskeleton organization;GO:0030029 actin filament-based process;GO:0016567 protein ubiquitination		Predicted intracellular proteins	Nuclear bodies (Uncertain); Additional: Nucleoplasm				0.0	0.0	0.0	0.0	0.0	0.0	0.0	0.0	0.0	0.0	0.0	0.0	0.0	0.0	0.0	0.0	0.0	0.0	0.0	0.0
ENSG00000178467.17	54681	ensembl_gene_id	H. sapiens	54681	H. sapiens	P4HTM	prolyl 4-hydroxylase, transmembrane	GO:0018401 peptidyl-proline hydroxylation to 4-hydroxy-L-proline;GO:0019511 peptidyl-proline hydroxylation;GO:0018126 protein hydroxylation		Human disease related genes:Other diseases:Mental and behavioural disorders; ENZYME proteins:Oxidoreductases; Disease related genes; Potential drug targets; Enzymes; Predicted intracellular proteins	Cytosol;Vesicles (Uncertain)	Ascorbic acid	(M3468)NABA ECM REGULATORS; (M5885)NABA MATRISOME ASSOCIATED; (M5889)NABA MATRISOME		0.0	0.0	0.0	0.0	0.0	0.0	0.0	0.0	0.0	0.0	0.0	0.0	0.0	0.0	0.0	0.0	0.0	0.0	0.0	0.0
ENSG00000076604.14	9618	ensembl_gene_id	H. sapiens	9618	H. sapiens	TRAF4	TNF receptor associated factor 4	GO:0007250 activation of NF-kappaB-inducing kinase activity;GO:0038061 NIK/NF-kappaB signaling;GO:0007585 respiratory gaseous exchange by respiratory system		Predicted intracellular proteins; Cancer-related genes:Candidate cancer biomarkers	Nucleoli fibrillar center (Supported); Additional: Cytosol;Nucleoplasm		(M256)PID TAP63 PATHWAY	(M5939)HALLMARK P53 PATHWAY	0.0	1.0	0.0	0.0	0.0	0.0	0.0	0.0	0.0	0.0	0.0	0.0	0.0	0.0	0.0	0.0	0.0	0.0	0.0	1.0
ENSG00000097021.19	11332	ensembl_gene_id	H. sapiens	11332	H. sapiens	ACOT7	acyl-CoA thioesterase 7	GO:0036116 long-chain fatty-acyl-CoA catabolic process;GO:1900533 palmitic acid metabolic process;GO:1900535 palmitic acid biosynthetic process		Enzymes; ENZYME proteins:Hydrolases; Predicted intracellular proteins	Cytosol (Supported); Additional: Nucleoplasm				0.0	0.0	0.0	1.0	0.0	0.0	0.0	0.0	0.0	1.0	0.0	0.0	0.0	0.0	1.0	0.0	0.0	0.0	0.0	0.0
ENSG00000133065.10	254428	ensembl_gene_id	H. sapiens	254428	H. sapiens	SLC41A1	solute carrier family 41 member 1	GO:0010961 cellular magnesium ion homeostasis;GO:0071286 cellular response to magnesium ion;GO:0010960 magnesium ion homeostasis		Transporters:Transporter channels and pores	Mitochondria (Approved)				0.0	0.0	0.0	0.0	0.0	0.0	0.0	0.0	0.0	0.0	0.0	0.0	0.0	0.0	0.0	0.0	0.0	0.0	0.0	0.0
ENSG00000125520.13	56731	ensembl_gene_id	H. sapiens	56731	H. sapiens	SLC2A4RG	SLC2A4 regulator	GO:0006357 regulation of transcription by RNA polymerase II;GO:0006355 regulation of transcription, DNA-templated;GO:1903506 regulation of nucleic acid-templated transcription		Predicted intracellular proteins	Nuclear speckles (Approved)				0.0	0.0	0.0	0.0	0.0	0.0	0.0	0.0	0.0	0.0	0.0	0.0	0.0	0.0	0.0	0.0	0.0	0.0	0.0	0.0
ENSG00000164038.14	133308	ensembl_gene_id	H. sapiens	133308	H. sapiens	SLC9B2	solute carrier family 9 member B2	GO:2001206 positive regulation of osteoclast development;GO:2001204 regulation of osteoclast development;GO:0045672 positive regulation of osteoclast differentiation		Transporters:Electrochemical Potential-driven transporters	Cell Junctions;Nucleoplasm (Approved)				0.0	1.0	0.0	0.0	0.0	0.0	0.0	0.0	0.0	0.0	0.0	0.0	0.0	0.0	0.0	0.0	0.0	0.0	0.0	0.0
ENSG00000211772.11	28638	ensembl_gene_id	H. sapiens	28638	H. sapiens	TRBC2	T cell receptor beta constant 2	GO:0006910 phagocytosis, recognition;GO:0006958 complement activation, classical pathway;GO:0002455 humoral immune response mediated by circulating immunoglobulin							1.0	1.0	0.0	0.0	0.0	0.0	0.0	0.0	0.0	0.0	0.0	0.0	0.0	0.0	0.0	0.0	0.0	0.0	0.0	0.0
ENSG00000163882.9	5437	ensembl_gene_id	H. sapiens	5437	H. sapiens	POLR2H	RNA polymerase II, I and III subunit H	GO:0006366 transcription by RNA polymerase II;GO:0006351 transcription, DNA-templated;GO:0097659 nucleic acid-templated transcription		Predicted intracellular proteins; RNA polymerase related proteins	Nucleoplasm (Supported)			(M5898)HALLMARK DNA REPAIR; (M5941)HALLMARK UV RESPONSE UP	0.0	0.0	0.0	1.0	0.0	1.0	0.0	0.0	0.0	0.0	0.0	0.0	0.0	0.0	0.0	0.0	1.0	0.0	0.0	0.0
ENSG00000138363.14	471	ensembl_gene_id	H. sapiens	471	H. sapiens	ATIC	5-aminoimidazole-4-carboxamide ribonucleotide formyltransferase/IMP cyclohydrolase	GO:0046452 dihydrofolate metabolic process;GO:0006189 'de novo' IMP biosynthetic process;GO:0097292 XMP metabolic process		FDA approved drug targets:Small molecule drugs; ENZYME proteins:Hydrolases; Human disease related genes:Congenital disorders of metabolism:Congenital disorders of nucleotide metabolism; Cancer-related genes; Disease related genes; Enzymes; Predicted intracellular proteins; ENZYME proteins:Transferases	Cytosol (Approved); Additional: Plasma membrane	Tetrahydrofolic acid; Methotrexate; Pemetrexed; AICA ribonucleotide; Guanosine-5'-Monophosphate; 5-monophosphate-9-beta-D-ribofuranosyl xanthine; Acid yellow 54 free acid; N-[4-([(2-Amino-4-oxo-1,4-dihydropyrido[3,2-d]pyrimidin-6-yl)methyl]{(2E)-3-[4-carbamoyl-1-(5-O-phosphono-beta-D-ribofuranosyl)-1H-imidazol-5-yl]-2-propenoyl}amino)benzoyl]-L-glutamic acid			0.0	0.0	0.0	0.0	0.0	0.0	0.0	0.0	0.0	1.0	0.0	1.0	0.0	0.0	1.0	0.0	0.0	0.0	0.0	0.0
ENSG00000166508.17	4176	ensembl_gene_id	H. sapiens	4176	H. sapiens	MCM7	minichromosome maintenance complex component 7	GO:0000727 double-strand break repair via break-induced replication;GO:0006271 DNA strand elongation involved in DNA replication;GO:0022616 DNA strand elongation		Enzymes; ENZYME proteins:Hydrolases; Predicted intracellular proteins; Cancer-related genes:Candidate cancer biomarkers	Nucleoplasm (Enhanced)		(M46)PID ATR PATHWAY	(M5925)HALLMARK E2F TARGETS; (M5926)HALLMARK MYC TARGETS V1; (M5930)HALLMARK EPITHELIAL MESENCHYMAL TRANSITION	0.0	0.0	0.0	0.0	0.0	1.0	0.0	0.0	1.0	0.0	0.0	0.0	0.0	0.0	0.0	0.0	0.0	0.0	0.0	0.0
ENSG00000135622.12	10505	ensembl_gene_id	H. sapiens	10505	H. sapiens	SEMA4F	ssemaphorin 4F	GO:0031290 retinal ganglion cell axon guidance;GO:0048843 negative regulation of axon extension involved in axon guidance;GO:0048841 regulation of axon extension involved in axon guidance		Predicted intracellular proteins	Nucleoplasm (Approved); Additional: Centrosome;Plasma membrane		(M5880)NABA ECM AFFILIATED; (M5885)NABA MATRISOME ASSOCIATED; (M5889)NABA MATRISOME		0.0	0.0	0.0	0.0	0.0	0.0	0.0	0.0	0.0	0.0	0.0	0.0	0.0	0.0	0.0	0.0	0.0	0.0	0.0	0.0
ENSG00000168781.21	9677	ensembl_gene_id	H. sapiens	9677	H. sapiens	PPIP5K1	diphosphoinositol pentakisphosphate kinase 1	GO:0006020 inositol metabolic process;GO:0032958 inositol phosphate biosynthetic process;GO:0043647 inositol phosphate metabolic process		Enzymes; Predicted intracellular proteins; ENZYME proteins:Transferases	Cytosol;Plasma membrane (Supported)				0.0	0.0	0.0	0.0	0.0	0.0	0.0	0.0	0.0	1.0	0.0	0.0	0.0	0.0	0.0	0.0	0.0	0.0	0.0	0.0
ENSG00000106397.11	8985	ensembl_gene_id	H. sapiens	8985	H. sapiens	PLOD3	procollagen-lysine,2-oxoglutarate 5-dioxygenase 3	GO:0046946 hydroxylysine metabolic process;GO:0046947 hydroxylysine biosynthetic process;GO:0017185 peptidyl-lysine hydroxylation		ENZYME proteins:Oxidoreductases; Predicted secreted proteins; Human disease related genes:Congenital malformations:Other congenital malformations; Disease related genes; Potential drug targets; Enzymes; Predicted intracellular proteins; ENZYME proteins:Transferases		Ascorbic acid	(M3468)NABA ECM REGULATORS; (M5885)NABA MATRISOME ASSOCIATED; (M5889)NABA MATRISOME	(M5930)HALLMARK EPITHELIAL MESENCHYMAL TRANSITION	0.0	0.0	0.0	0.0	0.0	0.0	0.0	0.0	0.0	1.0	0.0	0.0	0.0	0.0	0.0	0.0	0.0	0.0	0.0	0.0
ENSG00000108961.13	29098	ensembl_gene_id	H. sapiens	29098	H. sapiens	RANGRF	RAN guanine nucleotide release factor	GO:0090226 regulation of microtubule nucleation by Ran protein signal transduction;GO:0098905 regulation of bundle of His cell action potential;GO:0031291 Ran protein signal transduction		Predicted intracellular proteins	Nucleoplasm (Supported); Additional: Cytosol				0.0	0.0	0.0	0.0	0.0	0.0	0.0	0.0	0.0	0.0	0.0	0.0	0.0	0.0	0.0	0.0	0.0	0.0	0.0	0.0
ENSG00000100714.15	4522	ensembl_gene_id	H. sapiens	4522	H. sapiens	MTHFD1	methylenetetrahydrofolate dehydrogenase, cyclohydrolase and formyltetrahydrofolate synthetase 1	GO:0000105 histidine biosynthetic process;GO:0009257 10-formyltetrahydrofolate biosynthetic process;GO:0009256 10-formyltetrahydrofolate metabolic process		Human disease related genes:Congenital malformations:Congenital malformations of the nervous system; Predicted intracellular proteins	Cytosol (Enhanced)	Tetrahydrofolic acid; NADH; LY374571; Nicotinamide adenine dinucleotide phosphate; LY249543		(M5934)HALLMARK XENOBIOTIC METABOLISM	0.0	0.0	0.0	0.0	0.0	0.0	0.0	0.0	0.0	1.0	0.0	0.0	0.0	0.0	1.0	0.0	0.0	0.0	0.0	0.0
ENSG00000124181.14	5335	ensembl_gene_id	H. sapiens	5335	H. sapiens	PLCG1	phospholipase C gamma 1	GO:2000353 positive regulation of endothelial cell apoptotic process;GO:0038095 Fc-epsilon receptor signaling pathway;GO:1905564 positive regulation of vascular endothelial cell proliferation		ENZYME proteins:Hydrolases; Cancer-related genes:Mutational cancer driver genes; Enzymes; RAS pathway related proteins; Predicted intracellular proteins	Cytosol (Enhanced)		(M64)PID S1P S1P4 PATHWAY; (M103)PID S1P S1P1 PATHWAY; (M184)PID ECADHERIN KERATINOCYTE PATHWAY	(M5923)HALLMARK PI3K AKT MTOR SIGNALING; (M5915)HALLMARK APICAL JUNCTION	0.0	1.0	0.0	1.0	1.0	0.0	0.0	0.0	0.0	0.0	0.0	0.0	0.0	1.0	0.0	0.0	0.0	0.0	0.0	0.0
ENSG00000162572.20	6339	ensembl_gene_id	H. sapiens	6339	H. sapiens	SCNN1D	sodium channel epithelial 1 subunit delta	GO:0036253 response to amiloride;GO:0036254 cellular response to amiloride;GO:0071468 cellular response to acidic pH		Transporters:Transporter channels and pores; FDA approved drug targets:Small molecule drugs; Predicted intracellular proteins	Actin filaments;Plasma membrane (Supported)	Triamterene; Amiloride			0.0	0.0	0.0	0.0	0.0	0.0	0.0	0.0	0.0	0.0	0.0	0.0	0.0	0.0	0.0	0.0	0.0	0.0	0.0	0.0
ENSG00000161010.14	51149	ensembl_gene_id	H. sapiens	51149	H. sapiens	MRNIP	MRN complex interacting protein	GO:0071168 protein localization to chromatin;GO:2001032 regulation of double-strand break repair via nonhomologous end joining;GO:0007095 mitotic G2 DNA damage checkpoint signaling		Predicted intracellular proteins	Cytosol;Plasma membrane (Approved)				0.0	0.0	0.0	0.0	0.0	0.0	0.0	0.0	1.0	0.0	0.0	0.0	0.0	0.0	0.0	0.0	0.0	0.0	0.0	1.0
ENSG00000138002.14	26160	ensembl_gene_id	H. sapiens	26160	H. sapiens	IFT172	intraflagellar transport 172	GO:0061525 hindgut development;GO:0070986 left/right axis specification;GO:0060972 left/right pattern formation		Human disease related genes:Congenital malformations:Congenital malformations of the musculoskeletal system; Human disease related genes:Nervous system diseases:Eye disease; Predicted intracellular proteins; Disease related genes			(M219)PID HEDGEHOG GLI PATHWAY		0.0	0.0	1.0	0.0	0.0	0.0	0.0	0.0	0.0	0.0	0.0	0.0	0.0	0.0	0.0	0.0	0.0	0.0	0.0	0.0
ENSG00000188807.12	199953	ensembl_gene_id	H. sapiens	199953	H. sapiens	TMEM201	transmembrane protein 201	GO:0030473 nuclear migration along microtubule;GO:0010761 fibroblast migration;GO:0007097 nuclear migration			Nuclear membrane (Supported); Additional: Nucleoplasm				0.0	0.0	0.0	0.0	0.0	0.0	0.0	0.0	0.0	0.0	0.0	0.0	0.0	0.0	0.0	0.0	0.0	0.0	0.0	0.0
ENSG00000175792.11	8607	ensembl_gene_id	H. sapiens	8607	H. sapiens	RUVBL1	RuvB like AAA ATPase 1	GO:0000492 box C/D snoRNP assembly;GO:0000491 small nucleolar ribonucleoprotein complex assembly;GO:1904874 positive regulation of telomerase RNA localization to Cajal body		Enzymes; ENZYME proteins:Hydrolases; Predicted intracellular proteins	Cytosol;Nucleoplasm (Supported)		(M139)PID MYC PATHWAY; (M71)PID ILK PATHWAY; (M66)PID MYC ACTIV PATHWAY		0.0	0.0	1.0	0.0	0.0	1.0	0.0	0.0	1.0	0.0	0.0	0.0	0.0	0.0	0.0	0.0	0.0	0.0	0.0	1.0
ENSG00000076201.14	25930	ensembl_gene_id	H. sapiens	25930	H. sapiens	PTPN23	protein tyrosine phosphatase non-receptor type 23	GO:1903387 positive regulation of homophilic cell adhesion;GO:1903393 positive regulation of adherens junction organization;GO:1903385 regulation of homophilic cell adhesion		Human disease related genes:Congenital malformations:Congenital malformations of the nervous system; ENZYME proteins:Hydrolases; Disease related genes; Potential drug targets; Enzymes; Predicted intracellular proteins	Nuclear bodies;Nucleoplasm (Supported); Additional: Vesicles				0.0	0.0	1.0	0.0	0.0	0.0	1.0	0.0	0.0	0.0	0.0	0.0	0.0	0.0	0.0	0.0	0.0	0.0	0.0	0.0
ENSG00000141524.15	11322	ensembl_gene_id	H. sapiens	11322	H. sapiens	TMC6	transmembrane channel like 6	GO:0034220 ion transmembrane transport;GO:0055085 transmembrane transport;GO:0006811 ion transport		Human disease related genes:Skin diseases:Skin and soft tissue diseases; Disease related genes; Potential drug targets; Transporters:Transporter channels and pores; Predicted intracellular proteins					0.0	0.0	0.0	0.0	0.0	0.0	0.0	0.0	0.0	0.0	0.0	0.0	0.0	0.0	0.0	0.0	0.0	0.0	0.0	0.0
ENSG00000105643.9	27106	ensembl_gene_id	H. sapiens	27106	H. sapiens	ARRDC2	arrestin domain containing 2	GO:0015031 protein transport;GO:0045184 establishment of protein localization;GO:0071705 nitrogen compound transport		Predicted intracellular proteins	Nucleoplasm (Approved)				0.0	0.0	0.0	0.0	0.0	0.0	0.0	0.0	0.0	0.0	0.0	0.0	0.0	0.0	0.0	0.0	0.0	0.0	0.0	0.0
ENSG00000130702.15	3911	ensembl_gene_id	H. sapiens	3911	H. sapiens	LAMA5	laminin subunit alpha 5	GO:0060445 branching involved in salivary gland morphogenesis;GO:0007435 salivary gland morphogenesis;GO:0007431 salivary gland development		Predicted secreted proteins; Predicted intracellular proteins	Vesicles (Approved)	Lanoteplase	(M158)PID INTEGRIN4 PATHWAY; (M5887)NABA BASEMENT MEMBRANES; (M198)PID SYNDECAN 1 PATHWAY		0.0	0.0	1.0	0.0	0.0	0.0	0.0	0.0	0.0	0.0	0.0	0.0	0.0	0.0	0.0	0.0	0.0	0.0	0.0	0.0
ENSG00000171603.16	22883	ensembl_gene_id	H. sapiens	22883	H. sapiens	CLSTN1	calsyntenin 1	GO:0090128 regulation of synapse maturation;GO:0098969 neurotransmitter receptor transport to postsynaptic membrane;GO:0098877 neurotransmitter receptor transport to plasma membrane		Cancer-related genes:Candidate cancer biomarkers					0.0	0.0	0.0	0.0	0.0	0.0	0.0	0.0	0.0	0.0	0.0	0.0	0.0	0.0	0.0	0.0	0.0	0.0	0.0	0.0
ENSG00000181035.13	284439	ensembl_gene_id	H. sapiens	284439	H. sapiens	SLC25A42	solute carrier family 25 member 42	GO:0015880 coenzyme A transport;GO:0035349 coenzyme A transmembrane transport;GO:0071106 adenosine 3',5'-bisphosphate transmembrane transport		Transporters:Electrochemical Potential-driven transporters; Disease related genes; Potential drug targets	Mitochondria (Supported)				0.0	0.0	0.0	0.0	0.0	0.0	0.0	0.0	0.0	0.0	0.0	0.0	0.0	0.0	0.0	0.0	0.0	0.0	0.0	0.0
ENSG00000176472.10	284346	ensembl_gene_id	H. sapiens	284346	H. sapiens	ZNF575	zinc finger protein 575	GO:0006357 regulation of transcription by RNA polymerase II;GO:0006355 regulation of transcription, DNA-templated;GO:1903506 regulation of nucleic acid-templated transcription		Predicted intracellular proteins; Transcription factors:Zinc-coordinating DNA-binding domains	Nucleoplasm (Approved); Additional: Cytosol;Nucleoli fibrillar center				0.0	0.0	0.0	0.0	0.0	0.0	0.0	0.0	0.0	0.0	0.0	0.0	0.0	0.0	0.0	0.0	0.0	0.0	0.0	0.0
ENSG00000082458.11	1741	ensembl_gene_id	H. sapiens	1741	H. sapiens	DLG3	discs large MAGUK scaffold protein 3	GO:0001736 establishment of planar polarity;GO:0007164 establishment of tissue polarity;GO:0099072 regulation of postsynaptic membrane neurotransmitter receptor levels		Predicted intracellular proteins; Human disease related genes:Other diseases:Mental and behavioural disorders; Disease related genes	Nucleoli;Nucleoplasm (Approved)				0.0	0.0	0.0	1.0	0.0	0.0	0.0	0.0	0.0	0.0	0.0	0.0	0.0	0.0	0.0	0.0	0.0	0.0	0.0	1.0
ENSG00000121310.16	55268	ensembl_gene_id	H. sapiens	55268	H. sapiens	ECHDC2	enoyl-CoA hydratase domain containing 2	GO:0006635 fatty acid beta-oxidation;GO:0019395 fatty acid oxidation;GO:0009062 fatty acid catabolic process		Predicted intracellular proteins	Mitochondria (Approved)				0.0	0.0	0.0	0.0	0.0	0.0	0.0	0.0	0.0	0.0	0.0	0.0	0.0	0.0	0.0	0.0	0.0	0.0	0.0	0.0
ENSG00000099904.15	29801	ensembl_gene_id	H. sapiens	29801	H. sapiens	ZDHHC8	zinc finger DHHC-type palmitoyltransferase 8	GO:0034380 high-density lipoprotein particle assembly;GO:0034377 plasma lipoprotein particle assembly;GO:0018230 peptidyl-L-cysteine S-palmitoylation		Enzymes; ENZYME proteins:Transferases	Cytosol (Approved); Additional: Nucleoplasm				0.0	0.0	0.0	0.0	0.0	0.0	0.0	0.0	0.0	0.0	0.0	0.0	0.0	0.0	0.0	0.0	0.0	0.0	0.0	0.0
ENSG00000130810.19	56342	ensembl_gene_id	H. sapiens	56342	H. sapiens	PPAN	peter pan homolog	GO:0000027 ribosomal large subunit assembly;GO:0042255 ribosome assembly;GO:0042273 ribosomal large subunit biogenesis		Predicted intracellular proteins				(M5928)HALLMARK MYC TARGETS V2	0.0	0.0	1.0	0.0	0.0	0.0	0.0	0.0	0.0	0.0	0.0	0.0	0.0	0.0	0.0	0.0	0.0	0.0	0.0	0.0
ENSG00000135414.9	10220	ensembl_gene_id	H. sapiens	10220	H. sapiens	GDF11	growth differentiation factor 11	GO:0021512 spinal cord anterior/posterior patterning;GO:0021511 spinal cord patterning;GO:0010862 positive regulation of pathway-restricted SMAD protein phosphorylation		Predicted secreted proteins	Vesicles (Approved)		(M5883)NABA SECRETED FACTORS; (M5885)NABA MATRISOME ASSOCIATED; (M5889)NABA MATRISOME		0.0	0.0	0.0	0.0	0.0	0.0	0.0	0.0	0.0	0.0	0.0	0.0	0.0	0.0	0.0	0.0	0.0	0.0	0.0	1.0
ENSG00000211672.2	28786	ensembl_gene_id	H. sapiens	28786	H. sapiens	IGLV4-3	immunoglobulin lambda variable 4-3	GO:0002377 immunoglobulin production;GO:0002440 production of molecular mediator of immune response;GO:0002250 adaptive immune response		Predicted secreted proteins					1.0	0.0	0.0	0.0	0.0	0.0	0.0	0.0	0.0	0.0	0.0	0.0	0.0	0.0	0.0	0.0	0.0	0.0	0.0	0.0
ENSG00000225698.3	28410	ensembl_gene_id	H. sapiens	28410	H. sapiens	IGHV3-72	immunoglobulin heavy variable 3-72	GO:0006910 phagocytosis, recognition;GO:0006958 complement activation, classical pathway;GO:0002455 humoral immune response mediated by circulating immunoglobulin		Predicted secreted proteins; Predicted intracellular proteins					1.0	1.0	0.0	0.0	0.0	0.0	0.0	0.0	0.0	0.0	0.0	0.0	0.0	0.0	0.0	0.0	0.0	0.0	0.0	0.0
ENSG00000183655.12	64410	ensembl_gene_id	H. sapiens	64410	H. sapiens	KLHL25	kelch like family member 25	GO:0006446 regulation of translational initiation;GO:0006417 regulation of translation;GO:0006511 ubiquitin-dependent protein catabolic process		Predicted intracellular proteins	Cytosol;Nucleoplasm (Approved)				0.0	0.0	0.0	0.0	0.0	0.0	0.0	0.0	0.0	0.0	0.0	0.0	0.0	0.0	0.0	0.0	0.0	0.0	0.0	0.0
ENSG00000130255.12	25873	ensembl_gene_id	H. sapiens	25873	H. sapiens	RPL36	ribosomal protein L36	GO:0002181 cytoplasmic translation;GO:0006412 translation;GO:0043043 peptide biosynthetic process		Ribosomal proteins; Predicted intracellular proteins	Cytosol (Supported); Additional: Endoplasmic reticulum			(M5939)HALLMARK P53 PATHWAY	0.0	0.0	0.0	1.0	0.0	0.0	0.0	0.0	0.0	0.0	0.0	0.0	0.0	0.0	0.0	0.0	0.0	0.0	0.0	0.0
ENSG00000062524.15	4058	ensembl_gene_id	H. sapiens	4058	H. sapiens	LTK	leukocyte receptor tyrosine kinase	GO:0010663 positive regulation of striated muscle cell apoptotic process;GO:0010666 positive regulation of cardiac muscle cell apoptotic process;GO:0010661 positive regulation of muscle cell apoptotic process	Tyr protein kinase family	Kinases:Tyr protein kinases; Disease related genes; Potential drug targets; Enzymes; Predicted intracellular proteins; ENZYME proteins:Transferases	Vesicles (Approved)	Fostamatinib			0.0	0.0	0.0	0.0	0.0	0.0	0.0	0.0	0.0	0.0	0.0	0.0	0.0	0.0	0.0	0.0	0.0	0.0	0.0	1.0
ENSG00000171044.10	286046	ensembl_gene_id	H. sapiens	286046	H. sapiens	XKR6	XK related 6	GO:0070782 phosphatidylserine exposure on apoptotic cell surface;GO:0043652 engulfment of apoptotic cell;GO:0017121 plasma membrane phospholipid scrambling			Actin filaments (Approved)				0.0	1.0	0.0	0.0	0.0	0.0	0.0	0.0	0.0	0.0	0.0	0.0	0.0	0.0	0.0	0.0	0.0	0.0	0.0	0.0
ENSG00000114779.19	84836	ensembl_gene_id	H. sapiens	84836	H. sapiens	ABHD14B	abhydrolase domain containing 14B	GO:0034035 purine ribonucleoside bisphosphate metabolic process;GO:0050427 3'-phosphoadenosine 5'-phosphosulfate metabolic process;GO:0033865 nucleoside bisphosphate metabolic process		Predicted intracellular proteins	Nucleoli (Approved); Additional: Cytosol;Nucleoplasm				0.0	0.0	0.0	0.0	0.0	0.0	0.0	0.0	0.0	0.0	0.0	0.0	0.0	0.0	1.0	0.0	0.0	0.0	0.0	0.0
ENSG00000120053.10	2805	ensembl_gene_id	H. sapiens	2805	H. sapiens	GOT1	glutamic-oxaloacetic transaminase 1	GO:0019550 glutamate catabolic process to aspartate;GO:0019551 glutamate catabolic process to 2-oxoglutarate;GO:0006106 fumarate metabolic process		Enzymes; Predicted intracellular proteins; Cancer-related genes:Mutated cancer genes; ENZYME proteins:Transferases	Nucleoplasm (Supported); Additional: Cytosol	Pyridoxal phosphate; Aspartic acid; Glutamic acid; Cysteine; Adapalene; Maleic Acid; Copper		(M5924)HALLMARK MTORC1 SIGNALING; (M5937)HALLMARK GLYCOLYSIS	0.0	0.0	0.0	1.0	0.0	0.0	0.0	0.0	0.0	1.0	0.0	0.0	0.0	0.0	0.0	0.0	0.0	0.0	0.0	0.0
ENSG00000102226.9	8237	ensembl_gene_id	H. sapiens	8237	H. sapiens	USP11	ubiquitin specific peptidase 11	GO:0016579 protein deubiquitination;GO:0070646 protein modification by small protein removal;GO:0006511 ubiquitin-dependent protein catabolic process		Enzymes; ENZYME proteins:Hydrolases; Predicted intracellular proteins; Peptidases:Cysteine-type peptidases	Nucleoplasm (Supported); Additional: Cytosol			(M5946)HALLMARK COAGULATION; (M5898)HALLMARK DNA REPAIR	0.0	0.0	0.0	0.0	0.0	0.0	0.0	0.0	0.0	0.0	0.0	0.0	0.0	0.0	0.0	0.0	0.0	0.0	0.0	0.0
ENSG00000141293.15	8631	ensembl_gene_id	H. sapiens	8631	H. sapiens	SKAP1	src kinase associated phosphoprotein 1	GO:0033634 positive regulation of cell-cell adhesion mediated by integrin;GO:0033632 regulation of cell-cell adhesion mediated by integrin;GO:0033625 positive regulation of integrin activation		Predicted intracellular proteins	Nucleoplasm;Plasma membrane (Approved); Additional: Cytosol				1.0	1.0	0.0	0.0	0.0	0.0	1.0	0.0	0.0	0.0	0.0	0.0	1.0	1.0	0.0	0.0	0.0	0.0	0.0	0.0
ENSG00000114554.11	5361	ensembl_gene_id	H. sapiens	5361	H. sapiens	PLXNA1	plexin A1	GO:0060666 dichotomous subdivision of terminal units involved in salivary gland branching;GO:0060600 dichotomous subdivision of an epithelial terminal unit;GO:1902287 semaphorin-plexin signaling pathway involved in axon guidance			Nucleoplasm (Supported); Additional: Cytosol		(M5880)NABA ECM AFFILIATED; (M5885)NABA MATRISOME ASSOCIATED; (M5889)NABA MATRISOME		0.0	0.0	0.0	1.0	0.0	0.0	0.0	0.0	0.0	0.0	0.0	0.0	0.0	0.0	0.0	0.0	0.0	0.0	0.0	0.0
ENSG00000131067.16	2686	ensembl_gene_id	H. sapiens	2686	H. sapiens	GGT7	gamma-glutamyltransferase 7	GO:1901748 leukotriene D4 metabolic process;GO:1901750 leukotriene D4 biosynthetic process;GO:0006751 glutathione catabolic process		Enzymes; ENZYME proteins:Hydrolases; Predicted intracellular proteins; ENZYME proteins:Transferases	Vesicles (Approved); Additional: Nucleoplasm				0.0	0.0	0.0	1.0	0.0	0.0	0.0	0.0	0.0	1.0	0.0	0.0	0.0	0.0	0.0	0.0	0.0	0.0	0.0	0.0
ENSG00000126970.15	55906	ensembl_gene_id	H. sapiens	55906	H. sapiens	ZC4H2	zinc finger C4H2-type containing	GO:0003358 noradrenergic neuron development;GO:0003357 noradrenergic neuron differentiation;GO:0021522 spinal cord motor neuron differentiation		Predicted intracellular proteins; Human disease related genes:Musculoskeletal diseases:Other musculoskeletal diseases; Disease related genes	Microtubules;Vesicles (Approved)				0.0	0.0	0.0	0.0	0.0	0.0	0.0	0.0	0.0	0.0	0.0	0.0	0.0	0.0	0.0	0.0	0.0	0.0	0.0	0.0
ENSG00000249859.9	5820	ensembl_gene_id	H. sapiens	5820	H. sapiens	PVT1	Pvt1 oncogene							(M5939)HALLMARK P53 PATHWAY	0.0	0.0	0.0	0.0	0.0	0.0	0.0	0.0	0.0	0.0	0.0	0.0	0.0	0.0	0.0	0.0	0.0	0.0	0.0	0.0
ENSG00000149428.18	10525	ensembl_gene_id	H. sapiens	10525	H. sapiens	HYOU1	hypoxia up-regulated 1	GO:1903381 regulation of endoplasmic reticulum stress-induced neuron intrinsic apoptotic signaling pathway;GO:1903382 negative regulation of endoplasmic reticulum stress-induced neuron intrinsic apoptotic signaling pathway;GO:1903297 regulation of hypoxia-induced intrinsic apoptotic signaling pathway		Transporters:Primary Active Transporters; Predicted intracellular proteins; Disease related genes; Potential drug targets				(M5922)HALLMARK UNFOLDED PROTEIN RESPONSE	0.0	0.0	0.0	1.0	0.0	0.0	0.0	0.0	0.0	0.0	0.0	0.0	0.0	0.0	0.0	0.0	0.0	0.0	0.0	1.0
ENSG00000096384.19	3326	ensembl_gene_id	H. sapiens	3326	H. sapiens	HSP90AB1	heat shock protein 90 alpha family class B member 1	GO:1901389 negative regulation of transforming growth factor beta activation;GO:1903660 negative regulation of complement-dependent cytotoxicity;GO:1905323 telomerase holoenzyme complex assembly		Cancer-related genes:Mutated cancer genes; Cancer-related genes:Candidate cancer biomarkers; Transporters:Accessory Factors Involved in Transport; Cancer-related genes:Mutational cancer driver genes; Predicted intracellular proteins	Cytosol (Supported)	Geldanamycin; 9-Butyl-8-(3,4,5-Trimethoxybenzyl)-9h-Purin-6-Amine; Radicicol; Tanespimycin; SNX-5422; CCT-018159; 8-(6-BROMO-BENZO[1,3]DIOXOL-5-YLSULFANYL)-9-(3-ISOPROPYLAMINO-PROPYL)-ADENINE; 4-{4-[4-(3-AMINOPROPOXY)PHENYL]-1H-PYRAZOL-5-YL}-6-CHLOROBENZENE-1,3-DIOL; (5E)-14-CHLORO-15,17-DIHYDROXY-4,7,8,9,10,11-HEXAHYDRO-2-BENZOXACYCLOPENTADECINE-1,12(3H,13H)-DIONE; (5Z)-12-CHLORO-13,15-DIHYDROXY…	(M237)PID VEGFR1 2 PATHWAY	(M5926)HALLMARK MYC TARGETS V1	0.0	0.0	1.0	1.0	0.0	0.0	0.0	0.0	1.0	0.0	0.0	0.0	0.0	1.0	0.0	0.0	0.0	0.0	0.0	1.0
ENSG00000196839.12	100	ensembl_gene_id	H. sapiens	100	H. sapiens	ADA	adenosine deaminase	GO:0046111 xanthine biosynthetic process;GO:0060169 negative regulation of adenosine receptor signaling pathway;GO:0060407 negative regulation of penile erection		Human disease related genes:Immune system diseases:Primary immunodeficiency; FDA approved drug targets:Small molecule drugs; ENZYME proteins:Hydrolases; Disease related genes; Enzymes; Predicted intracellular proteins	Plasma membrane (Supported); Additional: Cytosol	Pentostatin; Dipyridamole; FR221647; 7,8-dihydroinosine; FR117016; FR236913; 6-hydroxy-1,6-dihydro purine nucleoside; FR-234938; FR239087; FR230513; 1-Deaza-Adenosine; Nebularine; (2S,3R)-3-(6-amino-9H-purin-9-yl)nonan-2-ol; 1-((1R)-1-(HYDROXYMETHYL)-3-{6-[(3-PHENYLPROPANOYL)AMINO]-1H-INDOL-1-YL}PROPYL)-1H-IMIDAZOLE-4-CARBOXAMIDE; 1-{(1R,2S)-2-HYDROXY-1-[2-(2-NAPHTHYLOXY)ETHYL]PROPYL}-1H-IMIDAZON…	(M236)PID DELTA NP63 PATHWAY; (M256)PID TAP63 PATHWAY; (M19)PID P73PATHWAY	(M5898)HALLMARK DNA REPAIR; (M5939)HALLMARK P53 PATHWAY	0.0	1.0	0.0	1.0	1.0	0.0	1.0	0.0	0.0	1.0	0.0	1.0	1.0	0.0	1.0	0.0	0.0	0.0	0.0	0.0
ENSG00000211934.3	28474	ensembl_gene_id	H. sapiens	28474	H. sapiens	IGHV1-2	immunoglobulin heavy variable 1-2			Predicted secreted proteins					0.0	0.0	0.0	0.0	0.0	0.0	0.0	0.0	0.0	0.0	0.0	0.0	0.0	0.0	0.0	0.0	0.0	0.0	0.0	0.0
ENSG00000166313.18	322	ensembl_gene_id	H. sapiens	322	H. sapiens	APBB1	amyloid beta precursor protein binding family B member 1	GO:0006939 smooth muscle contraction;GO:0043967 histone H4 acetylation;GO:1902807 negative regulation of cell cycle G1/S phase transition		Predicted intracellular proteins	Plasma membrane (Supported)		(M200)PID ERA GENOMIC PATHWAY	(M5950)HALLMARK ALLOGRAFT REJECTION	0.0	0.0	0.0	0.0	0.0	1.0	0.0	0.0	1.0	0.0	0.0	0.0	0.0	0.0	0.0	0.0	0.0	0.0	0.0	0.0
ENSG00000148219.16	23245	ensembl_gene_id	H. sapiens	23245	H. sapiens	ASTN2	astrotactin 2	GO:0048104 establishment of body hair or bristle planar orientation;GO:0048105 establishment of body hair planar orientation;GO:2000009 negative regulation of protein localization to cell surface		Predicted intracellular proteins	Cytosol (Approved); Additional: Nucleoplasm				0.0	0.0	0.0	0.0	0.0	0.0	0.0	0.0	0.0	0.0	0.0	0.0	0.0	0.0	0.0	0.0	0.0	0.0	0.0	0.0
ENSG00000148362.10	286257	ensembl_gene_id	H. sapiens	286257	H. sapiens	PAXX	PAXX non-homologous end joining factor	GO:0006303 double-strand break repair via nonhomologous end joining;GO:0006302 double-strand break repair;GO:0006281 DNA repair		Predicted intracellular proteins	Nucleoplasm (Supported)				0.0	0.0	0.0	0.0	0.0	0.0	0.0	0.0	1.0	0.0	0.0	0.0	0.0	0.0	0.0	0.0	0.0	0.0	0.0	0.0
ENSG00000184867.13	9823	ensembl_gene_id	H. sapiens	9823	H. sapiens	ARMCX2	armadillo repeat containing X-linked 2			Predicted intracellular proteins	Mitochondria (Approved); Additional: Nucleoplasm				0.0	0.0	0.0	0.0	0.0	0.0	0.0	0.0	0.0	0.0	0.0	0.0	0.0	0.0	0.0	0.0	0.0	0.0	0.0	0.0
ENSG00000159958.6	115650	ensembl_gene_id	H. sapiens	115650	H. sapiens	TNFRSF13C	TNF receptor superfamily member 13C	GO:0031296 B cell costimulation;GO:0031295 T cell costimulation;GO:0030890 positive regulation of B cell proliferation		Human disease related genes:Immune system diseases:Primary immunodeficiency; CD markers; Disease related genes					1.0	1.0	0.0	0.0	1.0	0.0	1.0	0.0	0.0	0.0	0.0	0.0	0.0	0.0	0.0	0.0	0.0	0.0	0.0	0.0
ENSG00000211652.2	28776	ensembl_gene_id	H. sapiens	28776	H. sapiens	IGLV7-43	immunoglobulin lambda variable 7-43	GO:0002377 immunoglobulin production;GO:0002440 production of molecular mediator of immune response;GO:0002250 adaptive immune response		Predicted secreted proteins					1.0	0.0	0.0	0.0	0.0	0.0	0.0	0.0	0.0	0.0	0.0	0.0	0.0	0.0	0.0	0.0	0.0	0.0	0.0	0.0
ENSG00000132361.16	23277	ensembl_gene_id	H. sapiens	23277	H. sapiens	CLUH	clustered mitochondria homolog	GO:0048312 intracellular distribution of mitochondria;GO:0048311 mitochondrion distribution;GO:0051646 mitochondrion localization		Predicted intracellular proteins	Vesicles (Supported); Additional: Nuclear bodies				0.0	0.0	0.0	0.0	0.0	0.0	0.0	0.0	0.0	0.0	0.0	0.0	0.0	0.0	0.0	0.0	0.0	0.0	0.0	0.0
ENSG00000123136.14	10212	ensembl_gene_id	H. sapiens	10212	H. sapiens	DDX39A	DExD-box helicase 39A	GO:0006406 mRNA export from nucleus;GO:0006405 RNA export from nucleus;GO:0051168 nuclear export		Enzymes; ENZYME proteins:Hydrolases; Predicted intracellular proteins	Nuclear speckles (Approved)			(M5901)HALLMARK G2M CHECKPOINT; (M5924)HALLMARK MTORC1 SIGNALING; (M5925)HALLMARK E2F TARGETS	0.0	0.0	0.0	1.0	0.0	0.0	0.0	0.0	0.0	0.0	0.0	0.0	0.0	0.0	0.0	0.0	0.0	0.0	0.0	0.0
ENSG00000258352.1						None	None	None	None	None	None	None	None	None	nan	nan	nan	nan	nan	nan	nan	nan	nan	nan	nan	nan	nan	nan	nan	nan	nan	nan	nan	nan
ENSG00000197756.9	6168	ensembl_gene_id	H. sapiens	6168	H. sapiens	RPL37A	ribosomal protein L37a	GO:0002181 cytoplasmic translation;GO:0006412 translation;GO:0043043 peptide biosynthetic process		Ribosomal proteins; Predicted intracellular proteins	Cytosol;Endoplasmic reticulum (Approved)				0.0	0.0	0.0	1.0	0.0	0.0	0.0	0.0	0.0	0.0	0.0	0.0	0.0	0.0	0.0	0.0	0.0	0.0	0.0	0.0
ENSG00000118971.7	894	ensembl_gene_id	H. sapiens	894	H. sapiens	CCND2	cyclin D2	GO:0045737 positive regulation of cyclin-dependent protein serine/threonine kinase activity;GO:1904031 positive regulation of cyclin-dependent protein kinase activity;GO:1900087 positive regulation of G1/S transition of mitotic cell cycle		Cancer-related genes:Candidate cancer biomarkers; Human disease related genes:Cancers:Cancers of male genital organs; Human disease related genes:Congenital malformations:Other congenital malformations; Disease related genes; Predicted intracellular proteins	Nucleoplasm (Enhanced)		(M234)PID IL2 STAT5 PATHWAY; (M279)PID RB 1PATHWAY; (M66)PID MYC ACTIV PATHWAY	(M5944)HALLMARK ANGIOGENESIS; (M5895)HALLMARK WNT BETA CATENIN SIGNALING; (M5902)HALLMARK APOPTOSIS	0.0	0.0	0.0	0.0	0.0	0.0	0.0	0.0	0.0	0.0	0.0	0.0	0.0	0.0	0.0	0.0	0.0	0.0	0.0	1.0
ENSG00000161016.17	6132	ensembl_gene_id	H. sapiens	6132	H. sapiens	RPL8	ribosomal protein L8	GO:0002181 cytoplasmic translation;GO:0006412 translation;GO:0043043 peptide biosynthetic process		Ribosomal proteins; Predicted intracellular proteins	Cytosol;Endoplasmic reticulum;Nucleoli (Supported)	(S)-3-phenyllactic acid; Anisomycin; Puromycin			0.0	0.0	0.0	1.0	0.0	0.0	0.0	0.0	0.0	0.0	0.0	0.0	0.0	0.0	0.0	0.0	0.0	0.0	0.0	0.0
ENSG00000235437.7	92249	ensembl_gene_id	H. sapiens	92249	H. sapiens	LINC01278	long intergenic non-protein coding RNA 1278								0.0	0.0	0.0	0.0	0.0	0.0	0.0	0.0	0.0	0.0	0.0	0.0	0.0	0.0	0.0	0.0	0.0	0.0	0.0	0.0
ENSG00000198851.9	916	ensembl_gene_id	H. sapiens	916	H. sapiens	CD3E	CD3e molecule	GO:0002669 positive regulation of T cell anergy;GO:0002913 positive regulation of lymphocyte anergy;GO:0033634 positive regulation of cell-cell adhesion mediated by integrin		Human disease related genes:Immune system diseases:Primary immunodeficiency; CD markers; Transporters:Accessory Factors Involved in Transport; FDA approved drug targets:Biotech drugs; Disease related genes	Endoplasmic reticulum;Plasma membrane (Supported); Additional: Golgi apparatus	Muromonab; Catumaxomab	(M290)PID IL12 STAT4 PATHWAY; (M196)PID IL23 PATHWAY; (M88)PID CD8 TCR PATHWAY	(M5950)HALLMARK ALLOGRAFT REJECTION	0.0	1.0	0.0	0.0	1.0	0.0	1.0	0.0	0.0	0.0	0.0	0.0	1.0	1.0	0.0	0.0	0.0	0.0	0.0	1.0
ENSG00000054148.17	29085	ensembl_gene_id	H. sapiens	29085	H. sapiens	PHPT1	phosphohistidine phosphatase 1	GO:0035971 peptidyl-histidine dephosphorylation;GO:2000984 negative regulation of ATP citrate synthase activity;GO:2000983 regulation of ATP citrate synthase activity		Enzymes; ENZYME proteins:Hydrolases; Predicted intracellular proteins	Cytosol (Approved); Additional: Nuclear bodies;Nucleoplasm;Plasma membrane				0.0	0.0	0.0	0.0	0.0	0.0	1.0	0.0	0.0	0.0	0.0	0.0	0.0	0.0	0.0	0.0	0.0	0.0	0.0	0.0
ENSG00000148399.12	92715	ensembl_gene_id	H. sapiens	92715	H. sapiens	DPH7	diphthamide biosynthesis 7	GO:0017182 peptidyl-diphthamide metabolic process;GO:0017183 peptidyl-diphthamide biosynthetic process from peptidyl-histidine;GO:1900247 regulation of cytoplasmic translational elongation		Enzymes; ENZYME proteins:Hydrolases; Predicted intracellular proteins	Nuclear bodies (Approved)				0.0	0.0	0.0	0.0	0.0	0.0	0.0	0.0	0.0	0.0	0.0	0.0	0.0	0.0	0.0	0.0	0.0	0.0	1.0	0.0
ENSG00000137337.14	9656	ensembl_gene_id	H. sapiens	9656	H. sapiens	MDC1	mediator of DNA damage checkpoint 1	GO:0031573 mitotic intra-S DNA damage checkpoint signaling;GO:0044773 mitotic DNA damage checkpoint signaling;GO:0044774 mitotic DNA integrity checkpoint signaling		Predicted intracellular proteins; Cancer-related genes:Mutational cancer driver genes	Nuclear bodies;Nucleoplasm (Supported); Additional: Focal adhesion sites		(M84)PID ATM PATHWAY		0.0	0.0	0.0	0.0	0.0	1.0	0.0	0.0	1.0	0.0	0.0	0.0	0.0	0.0	0.0	0.0	1.0	0.0	0.0	0.0
ENSG00000057935.13	57504	ensembl_gene_id	H. sapiens	57504	H. sapiens	MTA3	metastasis associated 1 family member 3	GO:0010971 positive regulation of G2/M transition of mitotic cell cycle;GO:1902751 positive regulation of cell cycle G2/M phase transition;GO:0016575 histone deacetylation		Transcription factors:Helix-turn-helix domains; Predicted intracellular proteins; Transcription factors:Zinc-coordinating DNA-binding domains	Nucleoplasm (Supported); Additional: Vesicles				0.0	0.0	0.0	0.0	0.0	0.0	0.0	0.0	0.0	0.0	0.0	0.0	0.0	0.0	0.0	0.0	0.0	0.0	0.0	0.0
ENSG00000147130.14	9203	ensembl_gene_id	H. sapiens	9203	H. sapiens	ZMYM3	zinc finger MYM-type containing 3	GO:0022604 regulation of cell morphogenesis;GO:0022603 regulation of anatomical structure morphogenesis;GO:0007010 cytoskeleton organization		Predicted intracellular proteins; Disease related genes	Nucleoplasm (Enhanced)				0.0	0.0	0.0	0.0	0.0	0.0	0.0	0.0	0.0	0.0	0.0	0.0	0.0	0.0	0.0	0.0	0.0	0.0	0.0	0.0
ENSG00000226950.6	57291	ensembl_gene_id	H. sapiens	57291	H. sapiens	DANCR	differentiation antagonizing non-protein coding RNA								0.0	0.0	0.0	0.0	0.0	0.0	0.0	0.0	0.0	0.0	0.0	0.0	0.0	0.0	0.0	0.0	0.0	0.0	0.0	0.0
ENSG00000280287.1						None	None	None	None	None	None	None	None	None	nan	nan	nan	nan	nan	nan	nan	nan	nan	nan	nan	nan	nan	nan	nan	nan	nan	nan	nan	nan
ENSG00000137502.9	27314	ensembl_gene_id	H. sapiens	27314	H. sapiens	RAB30	RAB30, member RAS oncogene family	GO:0032482 Rab protein signal transduction;GO:0007030 Golgi organization;GO:0007265 Ras protein signal transduction		Predicted intracellular proteins	Vesicles (Enhanced)				0.0	0.0	0.0	0.0	0.0	0.0	0.0	0.0	0.0	0.0	0.0	0.0	0.0	0.0	0.0	0.0	0.0	0.0	0.0	0.0
ENSG00000126602.10	10131	ensembl_gene_id	H. sapiens	10131	H. sapiens	TRAP1	TNF receptor associated protein 1	GO:0009386 translational attenuation;GO:1903750 regulation of intrinsic apoptotic signaling pathway in response to hydrogen peroxide;GO:1903751 negative regulation of intrinsic apoptotic signaling pathway in response to hydrogen peroxide		Predicted intracellular proteins	Mitochondria (Enhanced)				0.0	0.0	0.0	0.0	0.0	0.0	0.0	0.0	0.0	0.0	0.0	0.0	0.0	0.0	0.0	0.0	0.0	0.0	0.0	1.0
ENSG00000105202.8	2091	ensembl_gene_id	H. sapiens	2091	H. sapiens	FBL	fibrillarin	GO:0000494 box C/D RNA 3'-end processing;GO:0033967 box C/D RNA metabolic process;GO:0034963 box C/D RNA processing		Predicted intracellular proteins	Nucleoli fibrillar center (Supported)			(M5926)HALLMARK MYC TARGETS V1	0.0	0.0	1.0	1.0	0.0	0.0	0.0	0.0	0.0	0.0	1.0	0.0	0.0	0.0	0.0	0.0	0.0	0.0	0.0	0.0
ENSG00000167895.14	147138	ensembl_gene_id	H. sapiens	147138	H. sapiens	TMC8	transmembrane channel like 8	GO:0055069 zinc ion homeostasis;GO:1902041 regulation of extrinsic apoptotic signaling pathway via death domain receptors;GO:0032091 negative regulation of protein binding		Human disease related genes:Skin diseases:Skin and soft tissue diseases; Disease related genes; Potential drug targets; Transporters:Transporter channels and pores; Predicted intracellular proteins	Golgi apparatus (Uncertain)				0.0	0.0	0.0	0.0	0.0	0.0	0.0	0.0	0.0	0.0	0.0	0.0	0.0	0.0	0.0	0.0	0.0	0.0	0.0	0.0
ENSG00000140326.12	146059	ensembl_gene_id	H. sapiens	146059	H. sapiens	CDAN1	codanin 1	GO:0008156 negative regulation of DNA replication;GO:0006275 regulation of DNA replication;GO:0031497 chromatin assembly		Human disease related genes:Cardiovascular diseases:Hematologic diseases; Predicted intracellular proteins; Disease related genes	Cytosol (Enhanced); Additional: Plasma membrane				0.0	0.0	0.0	0.0	0.0	0.0	0.0	0.0	0.0	0.0	0.0	0.0	0.0	0.0	0.0	0.0	0.0	0.0	0.0	0.0
ENSG00000211968.3	28464	ensembl_gene_id	H. sapiens	28464	H. sapiens	IGHV1-58	immunoglobulin heavy variable 1-58	GO:0006910 phagocytosis, recognition;GO:0006958 complement activation, classical pathway;GO:0002455 humoral immune response mediated by circulating immunoglobulin		Predicted secreted proteins					1.0	1.0	0.0	0.0	0.0	0.0	0.0	0.0	0.0	0.0	0.0	0.0	0.0	0.0	0.0	0.0	0.0	0.0	0.0	0.0
ENSG00000148337.20	25792	ensembl_gene_id	H. sapiens	25792	H. sapiens	CIZ1	CDKN1A interacting zinc finger protein 1	GO:0032298 positive regulation of DNA-dependent DNA replication initiation;GO:0030174 regulation of DNA-dependent DNA replication initiation;GO:2000105 positive regulation of DNA-dependent DNA replication		Predicted intracellular proteins; Disease related genes	Nucleoplasm (Enhanced)				0.0	0.0	0.0	0.0	0.0	0.0	0.0	0.0	1.0	0.0	0.0	0.0	0.0	0.0	0.0	0.0	0.0	0.0	0.0	0.0
ENSG00000076248.10	7374	ensembl_gene_id	H. sapiens	7374	H. sapiens	UNG	uracil DNA glycosylase	GO:0097510 base-excision repair, AP site formation via deaminated base removal;GO:0045008 depyrimidination;GO:0006285 base-excision repair, AP site formation		Human disease related genes:Immune system diseases:Primary immunodeficiency; ENZYME proteins:Hydrolases; Disease related genes; Potential drug targets; Enzymes; Predicted intracellular proteins	Cytosol (Approved)	4-[(1E,7E)-8-(2,6-DIOXO-1,2,3,6-TETRAHYDROPYRIMIDIN-4-YL)-3,6-DIOXA-2,7-DIAZAOCTA-1,7-DIEN-1-YL]BENZOIC ACID; 1-(2-DEOXY-5-O-PHOSPHONO-BETA-D-ERYTHRO-PENTOFURANOSYL)-4-METHYL-1H-INDOLE; 3-[(1E,7E)-8-(2,6-dioxo-1,2,3,6-tetrahydropyrimidin-4-yl)-3,6-dioxa-2,7-diazaocta-1,7-dien-1-yl]benzoic acid		(M5928)HALLMARK MYC TARGETS V2; (M5924)HALLMARK MTORC1 SIGNALING; (M5925)HALLMARK E2F TARGETS	1.0	1.0	0.0	0.0	1.0	1.0	0.0	0.0	1.0	0.0	0.0	1.0	0.0	0.0	1.0	0.0	0.0	0.0	0.0	0.0
ENSG00000070423.17	55658	ensembl_gene_id	H. sapiens	55658	H. sapiens	RNF126	ring finger protein 126	GO:0071629 cytoplasm protein quality control by the ubiquitin-proteasome system;GO:0140455 cytoplasm protein quality control;GO:0071218 cellular response to misfolded protein		Enzymes; Predicted intracellular proteins; ENZYME proteins:Transferases	Nucleoplasm (Approved); Additional: Cytosol				0.0	0.0	0.0	0.0	0.0	0.0	0.0	0.0	0.0	0.0	0.0	0.0	0.0	0.0	0.0	0.0	0.0	0.0	0.0	0.0
ENSG00000072858.10	54847	ensembl_gene_id	H. sapiens	54847	H. sapiens	SIDT1	SID1 transmembrane family member 1	GO:0050657 nucleic acid transport;GO:0050658 RNA transport;GO:0051236 establishment of RNA localization		Transporters:Transporter channels and pores				(M5956)HALLMARK KRAS SIGNALING DN	0.0	0.0	0.0	0.0	0.0	0.0	0.0	0.0	0.0	0.0	0.0	0.0	0.0	0.0	0.0	0.0	0.0	0.0	0.0	0.0
ENSG00000198353.7	3221	ensembl_gene_id	H. sapiens	3221	H. sapiens	HOXC4	homeobox C4	GO:0048704 embryonic skeletal system morphogenesis;GO:0048706 embryonic skeletal system development;GO:0051216 cartilage development		Transcription factors:Helix-turn-helix domains; Predicted intracellular proteins	Nucleoplasm (Supported)				0.0	0.0	0.0	0.0	0.0	0.0	0.0	0.0	0.0	0.0	0.0	0.0	0.0	0.0	0.0	0.0	0.0	0.0	0.0	0.0
ENSG00000174669.11	3177	ensembl_gene_id	H. sapiens	3177	H. sapiens	SLC29A2	solute carrier family 29 member 2	GO:0015854 guanine transport;GO:0035364 thymine transport;GO:0035344 hypoxanthine transport		Transporters:Electrochemical Potential-driven transporters	Nucleoplasm (Uncertain)	Ethanol		(M5928)HALLMARK MYC TARGETS V2; (M5947)HALLMARK IL2 STAT5 SIGNALING	0.0	0.0	0.0	0.0	0.0	0.0	0.0	0.0	0.0	0.0	0.0	0.0	0.0	0.0	0.0	0.0	0.0	0.0	0.0	0.0
ENSG00000123159.15	10755	ensembl_gene_id	H. sapiens	10755	H. sapiens	GIPC1	GIPC PDZ domain containing family member 1	GO:0014047 glutamate secretion;GO:0048023 positive regulation of melanin biosynthetic process;GO:1900378 positive regulation of secondary metabolite biosynthetic process		Predicted intracellular proteins; Human disease related genes:Musculoskeletal diseases:Muscular diseases	Cell Junctions;Plasma membrane (Approved); Additional: Nucleoplasm		(M165)PID SYNDECAN 4 PATHWAY; (M187)PID TRKR PATHWAY		0.0	0.0	0.0	0.0	0.0	0.0	0.0	0.0	0.0	0.0	0.0	0.0	0.0	0.0	0.0	0.0	0.0	0.0	0.0	0.0
ENSG00000089220.4	5037	ensembl_gene_id	H. sapiens	5037	H. sapiens	PEBP1	phosphatidylethanolamine binding protein 1	GO:0043409 negative regulation of MAPK cascade;GO:0010951 negative regulation of endopeptidase activity;GO:0010466 negative regulation of peptidase activity		Predicted intracellular proteins	Cytosol;Plasma membrane (Approved)	Copper	(M14)PID AURORA B PATHWAY; (M164)PID ERBB1 DOWNSTREAM PATHWAY	(M5951)HALLMARK SPERMATOGENESIS	0.0	0.0	0.0	0.0	0.0	0.0	0.0	0.0	0.0	0.0	0.0	0.0	0.0	0.0	0.0	0.0	0.0	0.0	0.0	0.0
ENSG00000233927.4	6234	ensembl_gene_id	H. sapiens	6234	H. sapiens	RPS28	ribosomal protein S28	GO:0000028 ribosomal small subunit assembly;GO:0030490 maturation of SSU-rRNA;GO:0042255 ribosome assembly		Human disease related genes:Other congenital disorders:Ribosomopathies; Human disease related genes:Cardiovascular diseases:Hematologic diseases; Ribosomal proteins; Disease related genes; Predicted intracellular proteins	Cytosol (Approved)	Artenimol			0.0	0.0	1.0	1.0	0.0	0.0	0.0	0.0	0.0	0.0	0.0	0.0	0.0	0.0	0.0	0.0	0.0	0.0	0.0	0.0
ENSG00000130813.17	55337	ensembl_gene_id	H. sapiens	55337	H. sapiens	SHFL	shiftless antiviral inhibitor of ribosomal frameshifting	GO:0075523 viral translational frameshifting;GO:2001124 regulation of translational frameshifting;GO:2001125 negative regulation of translational frameshifting		Predicted intracellular proteins	Nucleoplasm (Supported); Additional: Cytosol				0.0	1.0	0.0	0.0	0.0	0.0	0.0	0.0	0.0	0.0	0.0	0.0	0.0	0.0	0.0	0.0	0.0	0.0	1.0	0.0
ENSG00000173486.12	2286	ensembl_gene_id	H. sapiens	2286	H. sapiens	FKBP2	FKBP prolyl isomerase 2	GO:0000413 protein peptidyl-prolyl isomerization;GO:0018208 peptidyl-proline modification;GO:0061077 chaperone-mediated protein folding		Enzymes; ENZYME proteins:Isomerase; Predicted intracellular proteins	Plasma membrane (Approved)			(M5924)HALLMARK MTORC1 SIGNALING	0.0	0.0	0.0	0.0	0.0	0.0	0.0	0.0	0.0	0.0	0.0	0.0	0.0	0.0	0.0	0.0	0.0	0.0	0.0	0.0
ENSG00000197816.13	100499483	ensembl_gene_id	H. sapiens	100499483	H. sapiens	CCDC180	coiled-coil domain containing 180			Predicted intracellular proteins					0.0	0.0	0.0	0.0	0.0	0.0	0.0	0.0	0.0	0.0	0.0	0.0	0.0	0.0	0.0	0.0	0.0	0.0	0.0	0.0
ENSG00000181191.11	64219	ensembl_gene_id	H. sapiens	64219	H. sapiens	PJA1	praja ring finger ubiquitin ligase 1	GO:0016567 protein ubiquitination;GO:0030163 protein catabolic process;GO:0032446 protein modification by small protein conjugation		Enzymes; Predicted intracellular proteins; ENZYME proteins:Transferases	Nucleoli;Nucleoplasm (Approved)				0.0	0.0	0.0	0.0	0.0	0.0	0.0	0.0	0.0	0.0	0.0	0.0	0.0	0.0	0.0	0.0	0.0	0.0	0.0	0.0
ENSG00000198917.12	51490	ensembl_gene_id	H. sapiens	51490	H. sapiens	SPOUT1	SPOUT domain containing methyltransferase 1	GO:0051661 maintenance of centrosome location;GO:0051657 maintenance of organelle location;GO:0035196 production of miRNAs involved in gene silencing by miRNA		Predicted intracellular proteins					0.0	0.0	0.0	0.0	0.0	0.0	0.0	0.0	0.0	0.0	0.0	0.0	0.0	0.0	0.0	0.0	0.0	0.0	0.0	0.0
ENSG00000137309.19	3159	ensembl_gene_id	H. sapiens	3159	H. sapiens	HMGA1	high mobility group AT-hook 1	GO:0090402 oncogene-induced cell senescence;GO:0006337 nucleosome disassembly;GO:0031498 chromatin disassembly		Transcription factors:beta-Sheet binding to DNA; Predicted intracellular proteins; Disease related genes; Cancer-related genes:Candidate cancer biomarkers	Nucleoplasm (Supported); Additional: Nucleoli		(M28)PID IL4 2PATHWAY; (M66)PID MYC ACTIV PATHWAY	(M5901)HALLMARK G2M CHECKPOINT; (M5925)HALLMARK E2F TARGETS	0.0	0.0	0.0	1.0	0.0	1.0	0.0	0.0	0.0	1.0	0.0	0.0	0.0	0.0	0.0	0.0	1.0	0.0	0.0	0.0
ENSG00000196235.13	6829	ensembl_gene_id	H. sapiens	6829	H. sapiens	SUPT5H	SPT5 homolog, DSIF elongation factor subunit	GO:1900364 negative regulation of mRNA polyadenylation;GO:0031441 negative regulation of mRNA 3'-end processing;GO:1900363 regulation of mRNA polyadenylation		Predicted intracellular proteins	Nucleoplasm (Enhanced)			(M5898)HALLMARK DNA REPAIR	0.0	0.0	0.0	1.0	0.0	0.0	0.0	0.0	0.0	0.0	0.0	0.0	0.0	0.0	0.0	0.0	1.0	0.0	0.0	0.0
ENSG00000108298.9	6143	ensembl_gene_id	H. sapiens	6143	H. sapiens	RPL19	ribosomal protein L19	GO:0002181 cytoplasmic translation;GO:0006412 translation;GO:0043043 peptide biosynthetic process		Ribosomal proteins; Predicted intracellular proteins	Cytosol;Nucleoli (Enhanced)	(S)-3-phenyllactic acid; Anisomycin; Puromycin			0.0	0.0	0.0	1.0	0.0	0.0	0.0	0.0	0.0	0.0	0.0	0.0	0.0	0.0	0.0	0.0	0.0	0.0	0.0	0.0
ENSG00000140688.16	64755	ensembl_gene_id	H. sapiens	64755	H. sapiens	RUSF1	RUS family member 1			Predicted intracellular proteins	Golgi apparatus;Nucleoli;Vesicles (Approved); Additional: Cytosol;Nucleoplasm				0.0	0.0	0.0	0.0	0.0	0.0	0.0	0.0	0.0	0.0	0.0	0.0	0.0	0.0	0.0	0.0	0.0	0.0	0.0	0.0
ENSG00000243708.10	100137049	ensembl_gene_id	H. sapiens	100137049	H. sapiens	PLA2G4B	phospholipase A2 group IVB	GO:0036148 phosphatidylglycerol acyl-chain remodeling;GO:0007567 parturition;GO:0046475 glycerophospholipid catabolic process		Enzymes; ENZYME proteins:Hydrolases; RAS pathway related proteins; Predicted intracellular proteins					0.0	0.0	0.0	1.0	0.0	0.0	0.0	0.0	0.0	0.0	0.0	0.0	0.0	0.0	0.0	0.0	0.0	0.0	0.0	0.0
ENSG00000084774.13	790	ensembl_gene_id	H. sapiens	790	H. sapiens	CAD	carbamoyl-phosphate synthetase 2, aspartate transcarbamylase, and dihydroorotase	GO:0044205 'de novo' UMP biosynthetic process;GO:0006225 UDP biosynthetic process;GO:0009194 pyrimidine ribonucleoside diphosphate biosynthetic process		ENZYME proteins:Ligase; Human disease related genes:Nervous system diseases:Epilepsy; Human disease related genes:Congenital disorders of metabolism:Congenital disorders of glycan/glycoprotein metabolism; ENZYME proteins:Hydrolases; Cancer-related genes:Mutational cancer driver genes; Disease related genes; Potential drug targets; Enzymes; Predicted intracellular proteins; ENZYME proteins:Transfe…	Cytosol (Supported)	Sparfosic acid	(M66)PID MYC ACTIV PATHWAY	(M5926)HALLMARK MYC TARGETS V1	0.0	0.0	0.0	0.0	0.0	0.0	0.0	0.0	0.0	1.0	0.0	0.0	0.0	0.0	1.0	0.0	0.0	0.0	0.0	0.0
ENSG00000159618.15	221188	ensembl_gene_id	H. sapiens	221188	H. sapiens	ADGRG5	adhesion G protein-coupled receptor G5	GO:0007189 adenylate cyclase-activating G protein-coupled receptor signaling pathway;GO:0007188 adenylate cyclase-modulating G protein-coupled receptor signaling pathway;GO:0007186 G protein-coupled receptor signaling pathway		G-protein coupled receptors:GPCRs excl olfactory receptors; Predicted intracellular proteins; G-protein coupled receptors:Family 2 (B) receptors	Nuclear membrane;Vesicles (Approved); Additional: Nucleoplasm				0.0	0.0	0.0	0.0	0.0	0.0	0.0	0.0	0.0	0.0	0.0	0.0	0.0	0.0	0.0	0.0	0.0	0.0	0.0	0.0
ENSG00000250479.8	400916	ensembl_gene_id	H. sapiens	400916	H. sapiens	CHCHD10	coiled-coil-helix-coiled-coil-helix domain containing 10	GO:0090143 nucleoid organization;GO:0090144 mitochondrial nucleoid organization;GO:1903109 positive regulation of mitochondrial transcription		Predicted intracellular proteins; Human disease related genes:Nervous system diseases:Neurodegenerative diseases; Disease related genes	Mitochondria (Supported)			(M5905)HALLMARK ADIPOGENESIS	0.0	1.0	0.0	0.0	0.0	0.0	0.0	0.0	0.0	0.0	0.0	0.0	0.0	0.0	0.0	0.0	0.0	0.0	0.0	0.0
ENSG00000123095.5	79365	ensembl_gene_id	H. sapiens	79365	H. sapiens	BHLHE41	basic helix-loop-helix family member e41	GO:0010944 negative regulation of transcription by competitive promoter binding;GO:0010832 negative regulation of myotube differentiation;GO:0051154 negative regulation of striated muscle cell differentiation		Transcription factors:Basic domains; Predicted intracellular proteins	Nucleoplasm (Supported); Additional: Vesicles		(M255)PID HIF1 TFPATHWAY		0.0	0.0	0.0	0.0	0.0	0.0	0.0	0.0	0.0	0.0	0.0	0.0	0.0	0.0	0.0	0.0	0.0	0.0	0.0	0.0
ENSG00000139266.5	92979	ensembl_gene_id	H. sapiens	92979	H. sapiens	MARCHF9	membrane associated ring-CH-type finger 9	GO:0016567 protein ubiquitination;GO:0032446 protein modification by small protein conjugation;GO:0070647 protein modification by small protein conjugation or removal		Enzymes; ENZYME proteins:Transferases					0.0	0.0	0.0	0.0	0.0	0.0	0.0	0.0	0.0	0.0	0.0	0.0	0.0	0.0	0.0	0.0	0.0	0.0	0.0	0.0
ENSG00000211972.2	28412	ensembl_gene_id	H. sapiens	28412	H. sapiens	IGHV3-66	immunoglobulin heavy variable 3-66	GO:0006910 phagocytosis, recognition;GO:0006958 complement activation, classical pathway;GO:0002455 humoral immune response mediated by circulating immunoglobulin		Predicted secreted proteins					1.0	1.0	0.0	0.0	0.0	0.0	0.0	0.0	0.0	0.0	0.0	0.0	0.0	0.0	0.0	0.0	0.0	0.0	0.0	0.0
ENSG00000204316.12	64978	ensembl_gene_id	H. sapiens	64978	H. sapiens	MRPL38	mitochondrial ribosomal protein L38			Ribosomal proteins; Predicted intracellular proteins	Mitochondria (Supported)				0.0	0.0	0.0	1.0	0.0	0.0	0.0	0.0	0.0	0.0	0.0	0.0	0.0	0.0	0.0	0.0	0.0	0.0	0.0	0.0
ENSG00000172534.13	3054	ensembl_gene_id	H. sapiens	3054	H. sapiens	HCFC1	host cell factor C1	GO:0019045 latent virus replication;GO:0019046 release from viral latency;GO:0019042 viral latency		Predicted intracellular proteins; Human disease related genes:Other diseases:Mental and behavioural disorders; Disease related genes; Human disease related genes:Congenital disorders of metabolism:Congenital disorders of cofactor/vitamin metabolism	Nucleoplasm (Supported)		(M5883)NABA SECRETED FACTORS; (M5885)NABA MATRISOME ASSOCIATED; (M5889)NABA MATRISOME		0.0	0.0	0.0	0.0	0.0	0.0	0.0	0.0	0.0	0.0	0.0	0.0	0.0	0.0	0.0	0.0	0.0	0.0	0.0	0.0
ENSG00000136699.19	55627	ensembl_gene_id	H. sapiens	55627	H. sapiens	SMPD4	sphingomyelin phosphodiesterase 4	GO:0006685 sphingomyelin catabolic process;GO:0006684 sphingomyelin metabolic process;GO:0030149 sphingolipid catabolic process		Human disease related genes:Other diseases:Mental and behavioural disorders; ENZYME proteins:Hydrolases; Disease related genes; Potential drug targets; Enzymes; Predicted intracellular proteins	Nuclear membrane (Approved); Additional: Cytosol	Phosphatidyl serine			0.0	0.0	0.0	1.0	0.0	0.0	0.0	0.0	0.0	0.0	0.0	0.0	0.0	0.0	0.0	0.0	0.0	0.0	0.0	0.0
ENSG00000160953.15	84939	ensembl_gene_id	H. sapiens	84939	H. sapiens	PWWP3A	PWWP domain containing 3A, DNA repair factor	GO:0006281 DNA repair;GO:0006325 chromatin organization;GO:0006259 DNA metabolic process		Predicted intracellular proteins	Cytosol;Nucleoplasm (Approved)				0.0	0.0	0.0	0.0	0.0	0.0	0.0	0.0	1.0	0.0	0.0	0.0	0.0	0.0	0.0	0.0	0.0	0.0	0.0	0.0
ENSG00000132635.16	64773	ensembl_gene_id	H. sapiens	64773	H. sapiens	PCED1A	PC-esterase domain containing 1A			Predicted intracellular proteins	Cytosol;Nucleoplasm (Approved)				0.0	0.0	0.0	0.0	0.0	0.0	0.0	0.0	0.0	0.0	0.0	0.0	0.0	0.0	0.0	0.0	0.0	0.0	0.0	0.0
ENSG00000278857.1	28903	ensembl_gene_id	H. sapiens	28903	H. sapiens	IGKV1D-12	immunoglobulin kappa variable 1D-12	GO:0002377 immunoglobulin production;GO:0002440 production of molecular mediator of immune response;GO:0002250 adaptive immune response		Predicted secreted proteins					1.0	0.0	0.0	0.0	0.0	0.0	0.0	0.0	0.0	0.0	0.0	0.0	0.0	0.0	0.0	0.0	0.0	0.0	0.0	0.0
ENSG00000160753.15	23623	ensembl_gene_id	H. sapiens	23623	H. sapiens	RUSC1	RUN and SH3 domain containing 1	GO:0000209 protein polyubiquitination;GO:0016567 protein ubiquitination;GO:0032446 protein modification by small protein conjugation		Predicted intracellular proteins	Cytosol (Enhanced)		(M270)PID MAPK TRK PATHWAY		0.0	0.0	0.0	0.0	0.0	0.0	0.0	0.0	0.0	0.0	0.0	0.0	0.0	0.0	0.0	0.0	0.0	0.0	0.0	0.0
ENSG00000149582.15	84866	ensembl_gene_id	H. sapiens	84866	H. sapiens	TMEM25	transmembrane protein 25	GO:0090394 negative regulation of excitatory postsynaptic potential;GO:0098815 modulation of excitatory postsynaptic potential;GO:0050805 negative regulation of synaptic transmission		Transporters:Accessory Factors Involved in Transport; Predicted intracellular proteins	Golgi apparatus;Vesicles (Approved)				0.0	0.0	0.0	0.0	0.0	0.0	0.0	0.0	0.0	0.0	0.0	0.0	0.0	0.0	0.0	0.0	0.0	0.0	0.0	0.0
ENSG00000116649.9	6723	ensembl_gene_id	H. sapiens	6723	H. sapiens	SRM	spermidine synthase	GO:0008295 spermidine biosynthetic process;GO:0008216 spermidine metabolic process;GO:0006596 polyamine biosynthetic process		Enzymes; Predicted intracellular proteins; ENZYME proteins:Transferases	Nucleoplasm (Approved); Additional: Cytosol			(M5928)HALLMARK MYC TARGETS V2; (M5926)HALLMARK MYC TARGETS V1	0.0	0.0	0.0	1.0	0.0	0.0	0.0	0.0	0.0	1.0	0.0	0.0	0.0	0.0	0.0	0.0	0.0	0.0	0.0	0.0
ENSG00000008838.19	9862	ensembl_gene_id	H. sapiens	9862	H. sapiens	MED24	mediator complex subunit 24	GO:0060261 positive regulation of transcription initiation from RNA polymerase II promoter;GO:2000144 positive regulation of DNA-templated transcription, initiation;GO:0060260 regulation of transcription initiation from RNA polymerase II promoter		Predicted intracellular proteins				(M5906)HALLMARK ESTROGEN RESPONSE EARLY; (M5937)HALLMARK GLYCOLYSIS	0.0	0.0	0.0	0.0	0.0	0.0	0.0	0.0	0.0	0.0	0.0	0.0	0.0	0.0	0.0	0.0	0.0	0.0	0.0	0.0
ENSG00000133131.14	79710	ensembl_gene_id	H. sapiens	79710	H. sapiens	MORC4	MORC family CW-type zinc finger 4			Predicted intracellular proteins; Cancer-related genes:Mutated cancer genes	Nucleoplasm (Enhanced)				0.0	0.0	0.0	0.0	0.0	0.0	0.0	0.0	0.0	0.0	0.0	0.0	0.0	0.0	0.0	0.0	0.0	0.0	0.0	0.0
ENSG00000161791.13	91010	ensembl_gene_id	H. sapiens	91010	H. sapiens	FMNL3	formin like 3	GO:0030866 cortical actin cytoskeleton organization;GO:0030865 cortical cytoskeleton organization;GO:0008360 regulation of cell shape		Predicted intracellular proteins	Golgi apparatus;Plasma membrane;Vesicles (Supported); Additional: Cytosol				0.0	0.0	0.0	0.0	0.0	0.0	0.0	0.0	0.0	0.0	0.0	0.0	0.0	0.0	0.0	0.0	0.0	0.0	0.0	0.0
ENSG00000119333.11	89891	ensembl_gene_id	H. sapiens	89891	H. sapiens	DYNC2I2	dynein 2 intermediate chain 2	GO:0035721 intraciliary retrograde transport;GO:0042073 intraciliary transport;GO:0031503 protein-containing complex localization		Human disease related genes:Congenital malformations:Congenital malformations of the musculoskeletal system; Predicted intracellular proteins; Disease related genes	Cytosol (Approved)				0.0	0.0	1.0	0.0	0.0	0.0	0.0	0.0	0.0	0.0	0.0	0.0	0.0	0.0	0.0	0.0	0.0	0.0	0.0	0.0
ENSG00000126368.5	9572	ensembl_gene_id	H. sapiens	9572	H. sapiens	NR1D1	nuclear receptor subfamily 1 group D member 1	GO:0060086 circadian temperature homeostasis;GO:0070859 positive regulation of bile acid biosynthetic process;GO:1904253 positive regulation of bile acid metabolic process		Predicted intracellular proteins; Transcription factors:Zinc-coordinating DNA-binding domains; Nuclear receptors	Nuclear bodies (Supported)	SR-9009; SR-9011	(M95)PID CIRCADIAN PATHWAY		0.0	1.0	0.0	1.0	0.0	0.0	0.0	0.0	0.0	0.0	0.0	0.0	0.0	0.0	0.0	0.0	0.0	0.0	0.0	0.0
ENSG00000204272.12	550643	ensembl_gene_id	H. sapiens	550643	H. sapiens	NBDY	negative regulator of P-body association	GO:0010607 negative regulation of cytoplasmic mRNA processing body assembly;GO:0010603 regulation of cytoplasmic mRNA processing body assembly;GO:1902116 negative regulation of organelle assembly		Predicted intracellular proteins					0.0	0.0	0.0	0.0	0.0	0.0	0.0	0.0	0.0	0.0	0.0	0.0	0.0	0.0	0.0	0.0	0.0	0.0	0.0	0.0
ENSG00000148384.12	56623	ensembl_gene_id	H. sapiens	56623	H. sapiens	INPP5E	inositol polyphosphate-5-phosphatase E	GO:1903565 negative regulation of protein localization to cilium;GO:1903564 regulation of protein localization to cilium;GO:0046838 phosphorylated carbohydrate dephosphorylation		Human disease related genes:Congenital malformations:Congenital malformations of the nervous system; ENZYME proteins:Hydrolases; Disease related genes; Potential drug targets; Enzymes; Predicted intracellular proteins	Focal adhesion sites;Golgi apparatus (Approved)				0.0	0.0	0.0	0.0	0.0	0.0	0.0	0.0	0.0	0.0	0.0	0.0	0.0	0.0	0.0	0.0	0.0	0.0	0.0	0.0
ENSG00000125245.12	2841	ensembl_gene_id	H. sapiens	2841	H. sapiens	GPR18	G protein-coupled receptor 18	GO:0002299 alpha-beta intraepithelial T cell differentiation;GO:0002300 CD8-positive, alpha-beta intraepithelial T cell differentiation;GO:0002304 gamma-delta intraepithelial T cell differentiation		G-protein coupled receptors:GPCRs excl olfactory receptors		Glycine; Cannabidiol; Medical Cannabis; Nabiximols		(M5913)HALLMARK INTERFERON GAMMA RESPONSE	0.0	0.0	0.0	0.0	1.0	0.0	0.0	0.0	0.0	0.0	0.0	0.0	0.0	0.0	0.0	0.0	0.0	0.0	0.0	0.0
ENSG00000144559.10	132001	ensembl_gene_id	H. sapiens	132001	H. sapiens	TAMM41	TAM41 mitochondrial translocator assembly and maintenance homolog	GO:0032049 cardiolipin biosynthetic process;GO:0006655 phosphatidylglycerol biosynthetic process;GO:0016024 CDP-diacylglycerol biosynthetic process		Enzymes; Predicted intracellular proteins; ENZYME proteins:Transferases	Cytosol (Approved)				0.0	0.0	0.0	0.0	0.0	0.0	0.0	0.0	0.0	0.0	0.0	0.0	0.0	0.0	0.0	0.0	0.0	0.0	0.0	0.0
ENSG00000255717.6	23642	ensembl_gene_id	H. sapiens	23642	H. sapiens	SNHG1	small nucleolar RNA host gene 1	GO:0006396 RNA processing;GO:0016070 RNA metabolic process;GO:0010467 gene expression							0.0	0.0	0.0	0.0	0.0	0.0	0.0	0.0	0.0	0.0	0.0	0.0	0.0	0.0	0.0	0.0	0.0	0.0	0.0	0.0
ENSG00000251039.2	28878	ensembl_gene_id	H. sapiens	28878	H. sapiens	IGKV2D-40	immunoglobulin kappa variable 2D-40			Predicted secreted proteins; Predicted intracellular proteins					0.0	0.0	0.0	0.0	0.0	0.0	0.0	0.0	0.0	0.0	0.0	0.0	0.0	0.0	0.0	0.0	0.0	0.0	0.0	0.0
ENSG00000136271.10	54606	ensembl_gene_id	H. sapiens	54606	H. sapiens	DDX56	DEAD-box helicase 56	GO:0010976 positive regulation of neuron projection development;GO:0006364 rRNA processing;GO:0016072 rRNA metabolic process		Enzymes; ENZYME proteins:Hydrolases; Predicted intracellular proteins	Nucleoli (Supported); Additional: Mitotic chromosome				0.0	0.0	1.0	0.0	0.0	0.0	0.0	0.0	0.0	0.0	0.0	0.0	0.0	0.0	0.0	0.0	0.0	0.0	0.0	0.0
ENSG00000128394.16	200316	ensembl_gene_id	H. sapiens	200316	H. sapiens	APOBEC3F	apolipoprotein B mRNA editing enzyme catalytic subunit 3F	GO:0070383 DNA cytosine deamination;GO:0006216 cytidine catabolic process;GO:0009972 cytidine deamination		Enzymes; ENZYME proteins:Hydrolases; Predicted intracellular proteins	Cytosol;Nucleoplasm (Uncertain)			(M5921)HALLMARK COMPLEMENT	0.0	1.0	0.0	0.0	0.0	0.0	0.0	0.0	1.0	0.0	1.0	1.0	0.0	0.0	1.0	0.0	0.0	0.0	0.0	0.0
ENSG00000143436.10	65005	ensembl_gene_id	H. sapiens	65005	H. sapiens	MRPL9	mitochondrial ribosomal protein L9	GO:0006412 translation;GO:0043043 peptide biosynthetic process;GO:0043604 amide biosynthetic process		Ribosomal proteins; Predicted intracellular proteins	Mitochondria (Supported)			(M5926)HALLMARK MYC TARGETS V1	0.0	0.0	0.0	1.0	0.0	0.0	0.0	0.0	0.0	0.0	0.0	0.0	0.0	0.0	0.0	0.0	0.0	0.0	0.0	0.0
ENSG00000151006.7	339105	ensembl_gene_id	H. sapiens	339105	H. sapiens	PRSS53	serine protease 53	GO:0006508 proteolysis;GO:0019538 protein metabolic process;GO:1901564 organonitrogen compound metabolic process		Enzymes; Predicted secreted proteins; Peptidases:Serine-type peptidases					0.0	0.0	0.0	0.0	0.0	0.0	0.0	0.0	0.0	0.0	0.0	0.0	0.0	0.0	0.0	0.0	0.0	0.0	0.0	0.0
ENSG00000124228.14	55661	ensembl_gene_id	H. sapiens	55661	H. sapiens	DDX27	DEAD-box helicase 27	GO:0006364 rRNA processing;GO:0016072 rRNA metabolic process;GO:0042254 ribosome biogenesis		Predicted intracellular proteins	Nucleoli (Approved)				0.0	0.0	1.0	0.0	0.0	0.0	0.0	0.0	0.0	0.0	0.0	0.0	0.0	0.0	0.0	0.0	0.0	0.0	0.0	0.0
ENSG00000174177.12	348180	ensembl_gene_id	H. sapiens	348180	H. sapiens	CTU2	cytosolic thiouridylase subunit 2	GO:0002143 tRNA wobble position uridine thiolation;GO:0032447 protein urmylation;GO:0034227 tRNA thio-modification		Human disease related genes:Congenital malformations:Congenital malformations of the nervous system; Predicted intracellular proteins; Disease related genes	Mitochondria (Supported)				0.0	0.0	1.0	1.0	0.0	0.0	0.0	1.0	0.0	0.0	1.0	0.0	0.0	0.0	0.0	0.0	0.0	0.0	0.0	0.0
ENSG00000062822.12	5424	ensembl_gene_id	H. sapiens	5424	H. sapiens	POLD1	DNA polymerase delta 1, catalytic subunit	GO:0045004 DNA replication proofreading;GO:0006297 nucleotide-excision repair, DNA gap filling;GO:0070987 error-free translesion synthesis		Cancer-related genes; Disease related genes; Potential drug targets; Enzymes; Predicted intracellular proteins; ENZYME proteins:Transferases	Nucleoplasm (Supported)			(M5898)HALLMARK DNA REPAIR; (M5925)HALLMARK E2F TARGETS	0.0	0.0	0.0	0.0	0.0	1.0	0.0	0.0	1.0	0.0	0.0	0.0	0.0	0.0	0.0	0.0	0.0	0.0	0.0	0.0
ENSG00000267787.5						None	None	None	None	None	None	None	None	None	nan	nan	nan	nan	nan	nan	nan	nan	nan	nan	nan	nan	nan	nan	nan	nan	nan	nan	nan	nan
ENSG00000253364.2						None	None	None	None	None	None	None	None	None	nan	nan	nan	nan	nan	nan	nan	nan	nan	nan	nan	nan	nan	nan	nan	nan	nan	nan	nan	nan
ENSG00000132153.14	22907	ensembl_gene_id	H. sapiens	22907	H. sapiens	DHX30	DExH-box helicase 30	GO:1902775 mitochondrial large ribosomal subunit assembly;GO:0061668 mitochondrial ribosome assembly;GO:0000027 ribosomal large subunit assembly		Human disease related genes:Other diseases:Mental and behavioural disorders; ENZYME proteins:Hydrolases; Disease related genes; Potential drug targets; Enzymes; Predicted intracellular proteins	Mitochondria (Supported); Additional: Cytosol				0.0	0.0	1.0	0.0	0.0	0.0	0.0	0.0	0.0	0.0	0.0	0.0	0.0	0.0	0.0	0.0	0.0	0.0	0.0	0.0
ENSG00000111752.10	1911	ensembl_gene_id	H. sapiens	1911	H. sapiens	PHC1	polyhomeotic homolog 1	GO:0016574 histone ubiquitination;GO:0016570 histone modification;GO:0016567 protein ubiquitination		Human disease related genes:Congenital malformations:Congenital malformations of the nervous system; Predicted intracellular proteins; Disease related genes	Nucleoplasm (Supported)				0.0	0.0	0.0	1.0	0.0	0.0	0.0	0.0	0.0	0.0	0.0	0.0	0.0	0.0	0.0	0.0	0.0	0.0	0.0	0.0
ENSG00000198089.15	9814	ensembl_gene_id	H. sapiens	9814	H. sapiens	SFI1	SFI1 centrin binding protein			Predicted intracellular proteins					0.0	0.0	0.0	0.0	0.0	0.0	0.0	0.0	0.0	0.0	0.0	0.0	0.0	0.0	0.0	0.0	0.0	0.0	0.0	0.0
ENSG00000172508.10	57571	ensembl_gene_id	H. sapiens	57571	H. sapiens	CARNS1	carnosine synthase 1	GO:0035499 carnosine biosynthetic process;GO:0035498 carnosine metabolic process;GO:0006548 histidine catabolic process		Enzymes; ENZYME proteins:Ligase; Predicted intracellular proteins					0.0	0.0	0.0	1.0	0.0	0.0	0.0	0.0	0.0	1.0	0.0	0.0	0.0	0.0	0.0	0.0	0.0	0.0	0.0	0.0
ENSG00000169031.18	1285	ensembl_gene_id	H. sapiens	1285	H. sapiens	COL4A3	collagen type IV alpha 3 chain	GO:0072577 endothelial cell apoptotic process;GO:0032836 glomerular basement membrane development;GO:0038063 collagen-activated tyrosine kinase receptor signaling pathway		Cancer-related genes:Candidate cancer biomarkers; Predicted secreted proteins; Human disease related genes:Congenital malformations:Other congenital malformations; Disease related genes; Human disease related genes:Urinary system diseases:Kidney diseases; Predicted intracellular proteins	Vesicles (Approved); Additional: Endoplasmic reticulum		(M5887)NABA BASEMENT MEMBRANES; (M53)PID INTEGRIN3 PATHWAY; (M3005)NABA COLLAGENS		0.0	0.0	0.0	1.0	0.0	0.0	0.0	0.0	0.0	0.0	0.0	0.0	0.0	0.0	0.0	0.0	0.0	0.0	0.0	0.0
ENSG00000185122.10	3297	ensembl_gene_id	H. sapiens	3297	H. sapiens	HSF1	heat shock transcription factor 1	GO:0061408 positive regulation of transcription from RNA polymerase II promoter in response to heat stress;GO:1904843 cellular response to nitroglycerin;GO:0072737 response to diamide		Transcription factors:Helix-turn-helix domains; Predicted intracellular proteins; Cancer-related genes:Candidate cancer biomarkers	Nucleoplasm (Supported); Additional: Cytosol	Bimoclomol	(M19)PID P73PATHWAY		0.0	1.0	0.0	1.0	0.0	0.0	0.0	0.0	1.0	0.0	0.0	0.0	0.0	0.0	0.0	0.0	0.0	0.0	0.0	1.0
ENSG00000094914.12	8086	ensembl_gene_id	H. sapiens	8086	H. sapiens	AAAS	aladin WD repeat nucleoporin	GO:0090307 mitotic spindle assembly;GO:0007052 mitotic spindle organization;GO:0051225 spindle assembly		Human disease related genes:Endocrine and metabolic diseases:Adrenal gland diseases; Disease related genes; Potential drug targets; Transporters:Transporter channels and pores; Predicted intracellular proteins	Nuclear membrane (Approved); Additional: Centrosome;Cytosol			(M5898)HALLMARK DNA REPAIR	0.0	0.0	1.0	1.0	0.0	0.0	0.0	0.0	0.0	0.0	0.0	0.0	0.0	0.0	0.0	0.0	1.0	0.0	0.0	0.0
ENSG00000129158.10	26297	ensembl_gene_id	H. sapiens	26297	H. sapiens	SERGEF	secretion regulating guanine nucleotide exchange factor	GO:0050709 negative regulation of protein secretion;GO:0051224 negative regulation of protein transport;GO:1904950 negative regulation of establishment of protein localization		Predicted intracellular proteins	Nucleoplasm (Enhanced); Additional: Cytosol				0.0	0.0	0.0	0.0	0.0	0.0	0.0	0.0	0.0	0.0	0.0	0.0	0.0	0.0	0.0	0.0	0.0	0.0	0.0	0.0
ENSG00000112877.7	55722	ensembl_gene_id	H. sapiens	55722	H. sapiens	CEP72	centrosomal protein 72	GO:0033566 gamma-tubulin complex localization;GO:1904779 regulation of protein localization to centrosome;GO:0007099 centriole replication		Predicted intracellular proteins	Centrosome (Approved); Additional: Mitochondria;Nucleoplasm			(M5893)HALLMARK MITOTIC SPINDLE	0.0	0.0	1.0	0.0	0.0	0.0	0.0	0.0	0.0	0.0	0.0	0.0	0.0	0.0	0.0	0.0	0.0	0.0	0.0	0.0
ENSG00000102096.9	11040	ensembl_gene_id	H. sapiens	11040	H. sapiens	PIM2	Pim-2 proto-oncogene, serine/threonine kinase	GO:0000082 G1/S transition of mitotic cell cycle;GO:0044843 cell cycle G1/S phase transition;GO:0010508 positive regulation of autophagy	CAMK Ser/Thr protein kinase family	Cancer-related genes:Candidate cancer biomarkers; Kinases:CAMK Ser/Thr protein kinases; Enzymes; Predicted intracellular proteins; ENZYME proteins:Transferases	Cytosol (Approved)				0.0	0.0	0.0	0.0	0.0	0.0	0.0	0.0	0.0	0.0	0.0	0.0	0.0	0.0	0.0	0.0	0.0	0.0	0.0	0.0
ENSG00000004975.11	1856	ensembl_gene_id	H. sapiens	1856	H. sapiens	DVL2	dishevelled segment polarity protein 2	GO:0014022 neural plate elongation;GO:0022007 convergent extension involved in neural plate elongation;GO:0044340 canonical Wnt signaling pathway involved in regulation of cell proliferation		Predicted intracellular proteins	Nucleoplasm (Enhanced); Additional: Nuclear bodies		(M31)PID BETA CATENIN DEG PATHWAY; (M90)PID WNT CANONICAL PATHWAY; (M23)PID WNT NONCANONICAL PATHWAY	(M5895)HALLMARK WNT BETA CATENIN SIGNALING	0.0	0.0	0.0	0.0	0.0	0.0	0.0	0.0	0.0	0.0	0.0	0.0	0.0	0.0	0.0	0.0	0.0	0.0	0.0	1.0
ENSG00000134684.10	8565	ensembl_gene_id	H. sapiens	8565	H. sapiens	YARS1	tyrosyl-tRNA synthetase 1	GO:0006437 tyrosyl-tRNA aminoacylation;GO:0006418 tRNA aminoacylation for protein translation;GO:0043039 tRNA aminoacylation		ENZYME proteins:Ligase; Predicted intracellular proteins; Disease related genes; Potential drug targets; Enzymes; Human disease related genes:Nervous system diseases:Neurodegenerative diseases	Cytosol (Enhanced)	Tyrosine; Beta-(2-Naphthyl)-Alanine; Resveratrol; Tyrosinal; N6-ISOPENTENYL-ADENOSINE-5'-MONOPHOSPHATE; p-Benzoyl-L-phenylalanine; 4-(2,2,2-TRIFLUOROETHYL)-L-PHENYLALANINE			0.0	0.0	1.0	1.0	0.0	0.0	0.0	1.0	0.0	1.0	0.0	0.0	0.0	0.0	0.0	0.0	0.0	0.0	0.0	0.0
ENSG00000130520.10	25804	ensembl_gene_id	H. sapiens	25804	H. sapiens	LSM4	LSM4 homolog, U6 small nuclear RNA and mRNA degradation associated	GO:0033962 P-body assembly;GO:0000387 spliceosomal snRNP assembly;GO:0000956 nuclear-transcribed mRNA catabolic process		Predicted intracellular proteins	Vesicles (Approved)			(M5922)HALLMARK UNFOLDED PROTEIN RESPONSE	0.0	0.0	1.0	1.0	0.0	0.0	0.0	0.0	0.0	0.0	0.0	0.0	0.0	0.0	0.0	0.0	0.0	0.0	0.0	0.0
ENSG00000137103.16	51754	ensembl_gene_id	H. sapiens	51754	H. sapiens	TMEM8B	transmembrane protein 8B	GO:0007160 cell-matrix adhesion;GO:0031589 cell-substrate adhesion;GO:0007346 regulation of mitotic cell cycle		Transporters:Transporter channels and pores	Vesicles (Approved)			(M5916)HALLMARK APICAL SURFACE; (M5915)HALLMARK APICAL JUNCTION	0.0	0.0	0.0	0.0	0.0	0.0	0.0	0.0	0.0	0.0	0.0	0.0	0.0	0.0	0.0	0.0	0.0	0.0	0.0	0.0
ENSG00000147912.12	26267	ensembl_gene_id	H. sapiens	26267	H. sapiens	FBXO10	F-box protein 10	GO:0006511 ubiquitin-dependent protein catabolic process;GO:0019941 modification-dependent protein catabolic process;GO:0043632 modification-dependent macromolecule catabolic process		Predicted intracellular proteins; Disease related genes	Cytosol;Nucleoplasm (Approved)				0.0	0.0	0.0	0.0	0.0	0.0	0.0	0.0	0.0	0.0	0.0	0.0	0.0	0.0	0.0	0.0	0.0	0.0	0.0	0.0
ENSG00000275023.4	4302	ensembl_gene_id	H. sapiens	4302	H. sapiens	MLLT6	MLLT6, PHD finger containing	GO:2001161 negative regulation of histone H3-K79 methylation;GO:0036359 renal potassium excretion;GO:0035812 renal sodium excretion		Predicted intracellular proteins; Cancer-related genes; Disease related genes	Nucleoplasm (Approved)				0.0	0.0	0.0	0.0	0.0	0.0	0.0	0.0	0.0	0.0	0.0	0.0	0.0	0.0	0.0	1.0	0.0	0.0	0.0	0.0
ENSG00000188878.19	85302	ensembl_gene_id	H. sapiens	85302	H. sapiens	FBF1	Fas binding factor 1	GO:0090162 establishment of epithelial cell polarity;GO:0043297 apical junction assembly;GO:0030010 establishment of cell polarity		Predicted intracellular proteins	Centrosome (Supported)				0.0	0.0	1.0	0.0	0.0	0.0	0.0	0.0	0.0	0.0	0.0	0.0	0.0	0.0	0.0	0.0	0.0	0.0	0.0	0.0
ENSG00000095059.15	1725	ensembl_gene_id	H. sapiens	1725	H. sapiens	DHPS	deoxyhypusine synthase	GO:0008612 peptidyl-lysine modification to peptidyl-hypusine;GO:0046203 spermidine catabolic process;GO:0006598 polyamine catabolic process		Human disease related genes:Other diseases:Mental and behavioural disorders; Disease related genes; Potential drug targets; Enzymes; Predicted intracellular proteins; ENZYME proteins:Transferases	Cytosol;Nucleoplasm (Approved)	1-Guanidinium-7-Aminoheptane		(M5934)HALLMARK XENOBIOTIC METABOLISM	0.0	1.0	0.0	1.0	0.0	0.0	1.0	0.0	0.0	0.0	0.0	0.0	0.0	0.0	0.0	0.0	0.0	0.0	0.0	0.0
ENSG00000135144.7	1840	ensembl_gene_id	H. sapiens	1840	H. sapiens	DTX1	deltex E3 ubiquitin ligase 1	GO:0045665 negative regulation of neuron differentiation;GO:0008593 regulation of Notch signaling pathway;GO:0007219 Notch signaling pathway		Enzymes; Predicted intracellular proteins; ENZYME proteins:Transferases	Cytosol;Nucleoplasm (Supported); Additional: Nuclear bodies		(M70)PID PS1 PATHWAY; (M17)PID NOTCH PATHWAY	(M5903)HALLMARK NOTCH SIGNALING	0.0	0.0	0.0	0.0	0.0	0.0	0.0	0.0	0.0	0.0	0.0	0.0	0.0	0.0	0.0	0.0	0.0	0.0	0.0	0.0
ENSG00000089248.6	10961	ensembl_gene_id	H. sapiens	10961	H. sapiens	ERP29	endoplasmic reticulum protein 29	GO:0043335 protein unfolding;GO:1902235 regulation of endoplasmic reticulum stress-induced intrinsic apoptotic signaling pathway;GO:0050709 negative regulation of protein secretion		Predicted intracellular proteins	Microtubules (Uncertain); Additional: Nucleoplasm			(M5935)HALLMARK FATTY ACID METABOLISM	0.0	0.0	0.0	0.0	0.0	0.0	0.0	0.0	0.0	0.0	0.0	0.0	0.0	0.0	0.0	0.0	0.0	0.0	0.0	1.0
ENSG00000148303.16	6130	ensembl_gene_id	H. sapiens	6130	H. sapiens	RPL7A	ribosomal protein L7a	GO:0000470 maturation of LSU-rRNA;GO:0042273 ribosomal large subunit biogenesis;GO:0002181 cytoplasmic translation		Ribosomal proteins; Predicted intracellular proteins; Disease related genes	Nucleoli (Approved); Additional: Vesicles				0.0	0.0	1.0	1.0	0.0	0.0	0.0	0.0	0.0	0.0	0.0	0.0	0.0	0.0	0.0	0.0	0.0	0.0	0.0	0.0
ENSG00000128596.16	64753	ensembl_gene_id	H. sapiens	64753	H. sapiens	CCDC136	coiled-coil domain containing 136	GO:0001675 acrosome assembly;GO:0033363 secretory granule organization;GO:0010927 cellular component assembly involved in morphogenesis		Predicted intracellular proteins	Golgi apparatus;Vesicles (Approved); Additional: Nuclear membrane;Plasma membrane				0.0	0.0	1.0	0.0	0.0	0.0	0.0	0.0	0.0	0.0	0.0	0.0	0.0	0.0	0.0	0.0	0.0	0.0	0.0	0.0
ENSG00000145982.11	10667	ensembl_gene_id	H. sapiens	10667	H. sapiens	FARS2	phenylalanyl-tRNA synthetase 2, mitochondrial	GO:0006432 phenylalanyl-tRNA aminoacylation;GO:0006418 tRNA aminoacylation for protein translation;GO:0043039 tRNA aminoacylation		ENZYME proteins:Ligase; Human disease related genes:Nervous system diseases:Other nervous and sensory system diseases; Disease related genes; Potential drug targets; Enzymes; Predicted intracellular proteins; Human disease related genes:Congenital disorders of metabolism:Mitochondrial diseases		Phenylalanine			0.0	0.0	1.0	1.0	0.0	0.0	0.0	1.0	0.0	1.0	0.0	0.0	0.0	0.0	0.0	0.0	0.0	0.0	0.0	0.0
ENSG00000167972.13	21	ensembl_gene_id	H. sapiens	21	H. sapiens	ABCA3	ATP binding cassette subfamily A member 3	GO:0032464 positive regulation of protein homooligomerization;GO:0032461 positive regulation of protein oligomerization;GO:0032462 regulation of protein homooligomerization		ENZYME proteins; Human disease related genes:Respiratory diseases:Lung diseases; Disease related genes; Potential drug targets; Enzymes; Transporters:Primary Active Transporters	Cytosol;Nucleoplasm (Approved)		(M200)PID ERA GENOMIC PATHWAY	(M5948)HALLMARK BILE ACID METABOLISM; (M5906)HALLMARK ESTROGEN RESPONSE EARLY; (M5907)HALLMARK ESTROGEN RESPONSE LATE	0.0	1.0	1.0	0.0	0.0	0.0	0.0	0.0	0.0	0.0	0.0	0.0	0.0	0.0	0.0	0.0	0.0	0.0	0.0	0.0
ENSG00000121716.20	29990	ensembl_gene_id	H. sapiens	29990	H. sapiens	PILRB	paired immunoglobin like type 2 receptor beta	GO:0007171 activation of transmembrane receptor protein tyrosine kinase activity;GO:0032147 activation of protein kinase activity;GO:0045860 positive regulation of protein kinase activity		Predicted intracellular proteins	Mitochondria (Approved)				0.0	0.0	0.0	0.0	0.0	0.0	0.0	0.0	0.0	0.0	0.0	0.0	0.0	0.0	0.0	0.0	0.0	0.0	0.0	1.0
ENSG00000132323.8	80895	ensembl_gene_id	H. sapiens	80895	H. sapiens	ILKAP	ILK associated serine/threonine phosphatase	GO:0006470 protein dephosphorylation;GO:0016311 dephosphorylation;GO:0006796 phosphate-containing compound metabolic process		Enzymes; ENZYME proteins:Hydrolases; Predicted intracellular proteins	Nucleoplasm (Supported)		(M71)PID ILK PATHWAY		0.0	0.0	0.0	0.0	0.0	0.0	0.0	0.0	0.0	0.0	0.0	0.0	0.0	0.0	0.0	0.0	0.0	0.0	0.0	0.0

## Sheet: Enrichment
GroupID	Category	Term	Description	LogP	Log(q-value)	InTerm_InList	Genes	Symbols
1_Summary	GO Biological Processes	GO:0002250	adaptive immune response	-66.359	-62.0123	97/617	930,939,970,973,975,3265,3493,3494,3501,3502,3507,3514,3537,3538,3539,3542,3662,4063,7374,8631,23495,28299,28385,28388,28391,28392,28394,28395,28400,28408,28409,28410,28412,28420,28423,28424,28426,28434,28439,28442,28444,28445,28448,28449,28450,28452,28455,28457,28464,28467,28468,28483,28638,28776,28778,28781,28784,28786,28793,28796,28797,28803,28804,28813,28814,28815,28816,28817,28820,28822,2882…	CD19,CD27,CD70,CD79A,CD81,HRAS,IGHA1,IGHA2,IGHG2,IGHG3,IGHM,IGKC,IGLC1,IGLC2,IGLC3,IGLC6,IRF4,LY9,UNG,SKAP1,TNFRSF13B,IGKV1-5,IGHV6-1,IGHV5-51,IGHV4-61,IGHV4-59,IGHV4-39,IGHV4-34,IGHV4-28,IGHV3-74,IGHV3-73,IGHV3-72,IGHV3-66,IGHV3-53,IGHV3-49,IGHV3-48,IGHV3-43,IGHV3-33,IGHV3-30,IGHV3-23,IGHV3-21,IGHV3-20,IGHV3-15,IGHV3-13,IGHV3-11,IGHV3-7,IGHV2-26,IGHV2-5,IGHV1-58,IGHV1-24,IGHV1-18,IGHJ1,TRBC2,IGL…
1_Member	GO Biological Processes	GO:0002250	adaptive immune response	-66.359	-62.0123	97/617	930,939,970,973,975,3265,3493,3494,3501,3502,3507,3514,3537,3538,3539,3542,3662,4063,7374,8631,23495,28299,28385,28388,28391,28392,28394,28395,28400,28408,28409,28410,28412,28420,28423,28424,28426,28434,28439,28442,28444,28445,28448,28449,28450,28452,28455,28457,28464,28467,28468,28483,28638,28776,28778,28781,28784,28786,28793,28796,28797,28803,28804,28813,28814,28815,28816,28817,28820,28822,2882…	CD19,CD27,CD70,CD79A,CD81,HRAS,IGHA1,IGHA2,IGHG2,IGHG3,IGHM,IGKC,IGLC1,IGLC2,IGLC3,IGLC6,IRF4,LY9,UNG,SKAP1,TNFRSF13B,IGKV1-5,IGHV6-1,IGHV5-51,IGHV4-61,IGHV4-59,IGHV4-39,IGHV4-34,IGHV4-28,IGHV3-74,IGHV3-73,IGHV3-72,IGHV3-66,IGHV3-53,IGHV3-49,IGHV3-48,IGHV3-43,IGHV3-33,IGHV3-30,IGHV3-23,IGHV3-21,IGHV3-20,IGHV3-15,IGHV3-13,IGHV3-11,IGHV3-7,IGHV2-26,IGHV2-5,IGHV1-58,IGHV1-24,IGHV1-18,IGHJ1,TRBC2,IGL…
1_Member	GO Biological Processes	GO:0002377	immunoglobulin production	-43.7425	-40.241	45/150	3514,7374,28299,28776,28778,28781,28784,28786,28793,28796,28797,28803,28804,28813,28814,28815,28816,28817,28820,28822,28823,28825,28826,28874,28875,28876,28882,28893,28903,28906,28907,28908,28912,28913,28915,28916,28919,28921,28930,28935,28937,28938,28940,28941,28943	IGKC,UNG,IGKV1-5,IGLV7-43,IGLV6-57,IGLV5-45,IGLV4-69,IGLV4-3,IGLV3-25,IGLV3-21,IGLV3-19,IGLV3-10,IGLV3-9,IGLV2-23,IGLV2-18,IGLV2-14,IGLV2-11,IGLV2-8,IGLV1-51,IGLV1-47,IGLV1-44,IGLV1-40,IGLV1-36,IGKV3D-20,IGKV3D-15,IGKV3D-11,IGKV2D-29,IGKV1D-39,IGKV1D-12,IGKV6-21,IGKV5-2,IGKV4-1,IGKV3-20,IGKV3-15,IGKV3-7,IGKV2-40,IGKV2-30,IGKV2-28,IGKV1-39,IGKV1-27,IGKV1-17,IGKV1-16,IGKV1-12,IGKV1-9,IGKV1-6
1_Member	GO Biological Processes	GO:0002440	production of molecular mediator of immune response	-43.3038	-39.9572	45/153	3514,7374,28299,28776,28778,28781,28784,28786,28793,28796,28797,28803,28804,28813,28814,28815,28816,28817,28820,28822,28823,28825,28826,28874,28875,28876,28882,28893,28903,28906,28907,28908,28912,28913,28915,28916,28919,28921,28930,28935,28937,28938,28940,28941,28943	IGKC,UNG,IGKV1-5,IGLV7-43,IGLV6-57,IGLV5-45,IGLV4-69,IGLV4-3,IGLV3-25,IGLV3-21,IGLV3-19,IGLV3-10,IGLV3-9,IGLV2-23,IGLV2-18,IGLV2-14,IGLV2-11,IGLV2-8,IGLV1-51,IGLV1-47,IGLV1-44,IGLV1-40,IGLV1-36,IGKV3D-20,IGKV3D-15,IGKV3D-11,IGKV2D-29,IGKV1D-39,IGKV1D-12,IGKV6-21,IGKV5-2,IGKV4-1,IGKV3-20,IGKV3-15,IGKV3-7,IGKV2-40,IGKV2-30,IGKV2-28,IGKV1-39,IGKV1-27,IGKV1-17,IGKV1-16,IGKV1-12,IGKV1-9,IGKV1-6
2_Summary	GO Biological Processes	GO:0050853	B cell receptor signaling pathway	-48.8445	-44.7989	44/112	930,973,3493,3494,3501,3502,3507,3514,3537,3538,3539,3542,3932,28385,28388,28391,28392,28394,28395,28400,28408,28409,28410,28412,28420,28423,28424,28426,28434,28439,28442,28444,28445,28448,28449,28450,28452,28455,28457,28464,28467,28468,28638,29760,100,939,975,10039,22806,23495,51237,51293,84433,115352,115650,286046,970,7374,3265,5335,8631,3662,4063,30815,1636,916,1725,2648,23513,5450,6223,28912,…	CD19,CD79A,IGHA1,IGHA2,IGHG2,IGHG3,IGHM,IGKC,IGLC1,IGLC2,IGLC3,IGLC6,LCK,IGHV6-1,IGHV5-51,IGHV4-61,IGHV4-59,IGHV4-39,IGHV4-34,IGHV4-28,IGHV3-74,IGHV3-73,IGHV3-72,IGHV3-66,IGHV3-53,IGHV3-49,IGHV3-48,IGHV3-43,IGHV3-33,IGHV3-30,IGHV3-23,IGHV3-21,IGHV3-20,IGHV3-15,IGHV3-13,IGHV3-11,IGHV3-7,IGHV2-26,IGHV2-5,IGHV1-58,IGHV1-24,IGHV1-18,TRBC2,BLNK,ADA,CD27,CD81,PARP3,IKZF3,TNFRSF13B,MZB1,CD320,CARD11,FCR…
2_Member	GO Biological Processes	GO:0050853	B cell receptor signaling pathway	-48.8445	-44.7989	44/112	930,973,3493,3494,3501,3502,3507,3514,3537,3538,3539,3542,3932,28385,28388,28391,28392,28394,28395,28400,28408,28409,28410,28412,28420,28423,28424,28426,28434,28439,28442,28444,28445,28448,28449,28450,28452,28455,28457,28464,28467,28468,28638,29760	CD19,CD79A,IGHA1,IGHA2,IGHG2,IGHG3,IGHM,IGKC,IGLC1,IGLC2,IGLC3,IGLC6,LCK,IGHV6-1,IGHV5-51,IGHV4-61,IGHV4-59,IGHV4-39,IGHV4-34,IGHV4-28,IGHV3-74,IGHV3-73,IGHV3-72,IGHV3-66,IGHV3-53,IGHV3-49,IGHV3-48,IGHV3-43,IGHV3-33,IGHV3-30,IGHV3-23,IGHV3-21,IGHV3-20,IGHV3-15,IGHV3-13,IGHV3-11,IGHV3-7,IGHV2-26,IGHV2-5,IGHV1-58,IGHV1-24,IGHV1-18,TRBC2,BLNK
2_Member	GO Biological Processes	GO:0006910	phagocytosis, recognition	-47.3441	-43.4745	40/89	3493,3494,3501,3502,3507,3514,3537,3538,3539,3542,28385,28388,28391,28392,28394,28395,28400,28408,28409,28410,28412,28420,28423,28424,28426,28434,28439,28442,28444,28445,28448,28449,28450,28452,28455,28457,28464,28467,28468,28638	IGHA1,IGHA2,IGHG2,IGHG3,IGHM,IGKC,IGLC1,IGLC2,IGLC3,IGLC6,IGHV6-1,IGHV5-51,IGHV4-61,IGHV4-59,IGHV4-39,IGHV4-34,IGHV4-28,IGHV3-74,IGHV3-73,IGHV3-72,IGHV3-66,IGHV3-53,IGHV3-49,IGHV3-48,IGHV3-43,IGHV3-33,IGHV3-30,IGHV3-23,IGHV3-21,IGHV3-20,IGHV3-15,IGHV3-13,IGHV3-11,IGHV3-7,IGHV2-26,IGHV2-5,IGHV1-58,IGHV1-24,IGHV1-18,TRBC2
2_Member	GO Biological Processes	GO:0050864	regulation of B cell activation	-46.9482	-43.2035	52/200	100,930,939,975,3493,3494,3501,3502,3507,3514,3537,3538,3539,3542,10039,22806,23495,28385,28388,28391,28392,28394,28395,28400,28408,28409,28410,28412,28420,28423,28424,28426,28434,28439,28442,28444,28445,28448,28449,28450,28452,28455,28457,28464,28467,28468,28638,51237,51293,84433,115352,115650	ADA,CD19,CD27,CD81,IGHA1,IGHA2,IGHG2,IGHG3,IGHM,IGKC,IGLC1,IGLC2,IGLC3,IGLC6,PARP3,IKZF3,TNFRSF13B,IGHV6-1,IGHV5-51,IGHV4-61,IGHV4-59,IGHV4-39,IGHV4-34,IGHV4-28,IGHV3-74,IGHV3-73,IGHV3-72,IGHV3-66,IGHV3-53,IGHV3-49,IGHV3-48,IGHV3-43,IGHV3-33,IGHV3-30,IGHV3-23,IGHV3-21,IGHV3-20,IGHV3-15,IGHV3-13,IGHV3-11,IGHV3-7,IGHV2-26,IGHV2-5,IGHV1-58,IGHV1-24,IGHV1-18,TRBC2,MZB1,CD320,CARD11,FCRL3,TNFRSF13C
2_Member	GO Biological Processes	GO:0050871	positive regulation of B cell activation	-46.3913	-42.7436	47/152	100,939,975,3493,3494,3501,3502,3507,3514,3537,3538,3539,3542,28385,28388,28391,28392,28394,28395,28400,28408,28409,28410,28412,28420,28423,28424,28426,28434,28439,28442,28444,28445,28448,28449,28450,28452,28455,28457,28464,28467,28468,28638,51293,84433,115352,115650	ADA,CD27,CD81,IGHA1,IGHA2,IGHG2,IGHG3,IGHM,IGKC,IGLC1,IGLC2,IGLC3,IGLC6,IGHV6-1,IGHV5-51,IGHV4-61,IGHV4-59,IGHV4-39,IGHV4-34,IGHV4-28,IGHV3-74,IGHV3-73,IGHV3-72,IGHV3-66,IGHV3-53,IGHV3-49,IGHV3-48,IGHV3-43,IGHV3-33,IGHV3-30,IGHV3-23,IGHV3-21,IGHV3-20,IGHV3-15,IGHV3-13,IGHV3-11,IGHV3-7,IGHV2-26,IGHV2-5,IGHV1-58,IGHV1-24,IGHV1-18,TRBC2,CD320,CARD11,FCRL3,TNFRSF13C
2_Member	GO Biological Processes	GO:0002455	humoral immune response mediated by circulating immunoglobulin	-44.3808	-40.8123	41/110	975,3493,3494,3501,3502,3507,3514,3537,3538,3539,3542,28385,28388,28391,28392,28394,28395,28400,28408,28409,28410,28412,28420,28423,28424,28426,28434,28439,28442,28444,28445,28448,28449,28450,28452,28455,28457,28464,28467,28468,28638	CD81,IGHA1,IGHA2,IGHG2,IGHG3,IGHM,IGKC,IGLC1,IGLC2,IGLC3,IGLC6,IGHV6-1,IGHV5-51,IGHV4-61,IGHV4-59,IGHV4-39,IGHV4-34,IGHV4-28,IGHV3-74,IGHV3-73,IGHV3-72,IGHV3-66,IGHV3-53,IGHV3-49,IGHV3-48,IGHV3-43,IGHV3-33,IGHV3-30,IGHV3-23,IGHV3-21,IGHV3-20,IGHV3-15,IGHV3-13,IGHV3-11,IGHV3-7,IGHV2-26,IGHV2-5,IGHV1-58,IGHV1-24,IGHV1-18,TRBC2
2_Member	GO Biological Processes	GO:0006958	complement activation, classical pathway	-43.5609	-40.1173	40/106	3493,3494,3501,3502,3507,3514,3537,3538,3539,3542,28385,28388,28391,28392,28394,28395,28400,28408,28409,28410,28412,28420,28423,28424,28426,28434,28439,28442,28444,28445,28448,28449,28450,28452,28455,28457,28464,28467,28468,28638	IGHA1,IGHA2,IGHG2,IGHG3,IGHM,IGKC,IGLC1,IGLC2,IGLC3,IGLC6,IGHV6-1,IGHV5-51,IGHV4-61,IGHV4-59,IGHV4-39,IGHV4-34,IGHV4-28,IGHV3-74,IGHV3-73,IGHV3-72,IGHV3-66,IGHV3-53,IGHV3-49,IGHV3-48,IGHV3-43,IGHV3-33,IGHV3-30,IGHV3-23,IGHV3-21,IGHV3-20,IGHV3-15,IGHV3-13,IGHV3-11,IGHV3-7,IGHV2-26,IGHV2-5,IGHV1-58,IGHV1-24,IGHV1-18,TRBC2
2_Member	GO Biological Processes	GO:0006911	phagocytosis, engulfment	-43.4332	-40.0407	41/115	3493,3494,3501,3502,3507,3514,3537,3538,3539,3542,28385,28388,28391,28392,28394,28395,28400,28408,28409,28410,28412,28420,28423,28424,28426,28434,28439,28442,28444,28445,28448,28449,28450,28452,28455,28457,28464,28467,28468,28638,286046	IGHA1,IGHA2,IGHG2,IGHG3,IGHM,IGKC,IGLC1,IGLC2,IGLC3,IGLC6,IGHV6-1,IGHV5-51,IGHV4-61,IGHV4-59,IGHV4-39,IGHV4-34,IGHV4-28,IGHV3-74,IGHV3-73,IGHV3-72,IGHV3-66,IGHV3-53,IGHV3-49,IGHV3-48,IGHV3-43,IGHV3-33,IGHV3-30,IGHV3-23,IGHV3-21,IGHV3-20,IGHV3-15,IGHV3-13,IGHV3-11,IGHV3-7,IGHV2-26,IGHV2-5,IGHV1-58,IGHV1-24,IGHV1-18,TRBC2,XKR6
2_Member	GO Biological Processes	GO:0099024	plasma membrane invagination	-41.8544	-38.5491	41/124	3493,3494,3501,3502,3507,3514,3537,3538,3539,3542,28385,28388,28391,28392,28394,28395,28400,28408,28409,28410,28412,28420,28423,28424,28426,28434,28439,28442,28444,28445,28448,28449,28450,28452,28455,28457,28464,28467,28468,28638,286046	IGHA1,IGHA2,IGHG2,IGHG3,IGHM,IGKC,IGLC1,IGLC2,IGLC3,IGLC6,IGHV6-1,IGHV5-51,IGHV4-61,IGHV4-59,IGHV4-39,IGHV4-34,IGHV4-28,IGHV3-74,IGHV3-73,IGHV3-72,IGHV3-66,IGHV3-53,IGHV3-49,IGHV3-48,IGHV3-43,IGHV3-33,IGHV3-30,IGHV3-23,IGHV3-21,IGHV3-20,IGHV3-15,IGHV3-13,IGHV3-11,IGHV3-7,IGHV2-26,IGHV2-5,IGHV1-58,IGHV1-24,IGHV1-18,TRBC2,XKR6
2_Member	GO Biological Processes	GO:0010324	membrane invagination	-40.724	-37.4565	41/131	3493,3494,3501,3502,3507,3514,3537,3538,3539,3542,28385,28388,28391,28392,28394,28395,28400,28408,28409,28410,28412,28420,28423,28424,28426,28434,28439,28442,28444,28445,28448,28449,28450,28452,28455,28457,28464,28467,28468,28638,286046	IGHA1,IGHA2,IGHG2,IGHG3,IGHM,IGKC,IGLC1,IGLC2,IGLC3,IGLC6,IGHV6-1,IGHV5-51,IGHV4-61,IGHV4-59,IGHV4-39,IGHV4-34,IGHV4-28,IGHV3-74,IGHV3-73,IGHV3-72,IGHV3-66,IGHV3-53,IGHV3-49,IGHV3-48,IGHV3-43,IGHV3-33,IGHV3-30,IGHV3-23,IGHV3-21,IGHV3-20,IGHV3-15,IGHV3-13,IGHV3-11,IGHV3-7,IGHV2-26,IGHV2-5,IGHV1-58,IGHV1-24,IGHV1-18,TRBC2,XKR6
2_Member	GO Biological Processes	GO:0006956	complement activation	-40.6672	-37.4345	40/122	3493,3494,3501,3502,3507,3514,3537,3538,3539,3542,28385,28388,28391,28392,28394,28395,28400,28408,28409,28410,28412,28420,28423,28424,28426,28434,28439,28442,28444,28445,28448,28449,28450,28452,28455,28457,28464,28467,28468,28638	IGHA1,IGHA2,IGHG2,IGHG3,IGHM,IGKC,IGLC1,IGLC2,IGLC3,IGLC6,IGHV6-1,IGHV5-51,IGHV4-61,IGHV4-59,IGHV4-39,IGHV4-34,IGHV4-28,IGHV3-74,IGHV3-73,IGHV3-72,IGHV3-66,IGHV3-53,IGHV3-49,IGHV3-48,IGHV3-43,IGHV3-33,IGHV3-30,IGHV3-23,IGHV3-21,IGHV3-20,IGHV3-15,IGHV3-13,IGHV3-11,IGHV3-7,IGHV2-26,IGHV2-5,IGHV1-58,IGHV1-24,IGHV1-18,TRBC2
2_Member	GO Biological Processes	GO:0019724	B cell mediated immunity	-40.6276	-37.427	45/173	930,939,970,975,3493,3494,3501,3502,3507,3514,3537,3538,3539,3542,7374,28385,28388,28391,28392,28394,28395,28400,28408,28409,28410,28412,28420,28423,28424,28426,28434,28439,28442,28444,28445,28448,28449,28450,28452,28455,28457,28464,28467,28468,28638	CD19,CD27,CD70,CD81,IGHA1,IGHA2,IGHG2,IGHG3,IGHM,IGKC,IGLC1,IGLC2,IGLC3,IGLC6,UNG,IGHV6-1,IGHV5-51,IGHV4-61,IGHV4-59,IGHV4-39,IGHV4-34,IGHV4-28,IGHV3-74,IGHV3-73,IGHV3-72,IGHV3-66,IGHV3-53,IGHV3-49,IGHV3-48,IGHV3-43,IGHV3-33,IGHV3-30,IGHV3-23,IGHV3-21,IGHV3-20,IGHV3-15,IGHV3-13,IGHV3-11,IGHV3-7,IGHV2-26,IGHV2-5,IGHV1-58,IGHV1-24,IGHV1-18,TRBC2
2_Member	GO Biological Processes	GO:0050851	antigen receptor-mediated signaling pathway	-40.5111	-37.3405	47/197	930,973,3265,3493,3494,3501,3502,3507,3514,3537,3538,3539,3542,3932,5335,8631,28385,28388,28391,28392,28394,28395,28400,28408,28409,28410,28412,28420,28423,28424,28426,28434,28439,28442,28444,28445,28448,28449,28450,28452,28455,28457,28464,28467,28468,28638,29760	CD19,CD79A,HRAS,IGHA1,IGHA2,IGHG2,IGHG3,IGHM,IGKC,IGLC1,IGLC2,IGLC3,IGLC6,LCK,PLCG1,SKAP1,IGHV6-1,IGHV5-51,IGHV4-61,IGHV4-59,IGHV4-39,IGHV4-34,IGHV4-28,IGHV3-74,IGHV3-73,IGHV3-72,IGHV3-66,IGHV3-53,IGHV3-49,IGHV3-48,IGHV3-43,IGHV3-33,IGHV3-30,IGHV3-23,IGHV3-21,IGHV3-20,IGHV3-15,IGHV3-13,IGHV3-11,IGHV3-7,IGHV2-26,IGHV2-5,IGHV1-58,IGHV1-24,IGHV1-18,TRBC2,BLNK
2_Member	GO Biological Processes	GO:0016064	immunoglobulin mediated immune response	-39.7456	-36.603	44/169	930,939,975,3493,3494,3501,3502,3507,3514,3537,3538,3539,3542,7374,28385,28388,28391,28392,28394,28395,28400,28408,28409,28410,28412,28420,28423,28424,28426,28434,28439,28442,28444,28445,28448,28449,28450,28452,28455,28457,28464,28467,28468,28638	CD19,CD27,CD81,IGHA1,IGHA2,IGHG2,IGHG3,IGHM,IGKC,IGLC1,IGLC2,IGLC3,IGLC6,UNG,IGHV6-1,IGHV5-51,IGHV4-61,IGHV4-59,IGHV4-39,IGHV4-34,IGHV4-28,IGHV3-74,IGHV3-73,IGHV3-72,IGHV3-66,IGHV3-53,IGHV3-49,IGHV3-48,IGHV3-43,IGHV3-33,IGHV3-30,IGHV3-23,IGHV3-21,IGHV3-20,IGHV3-15,IGHV3-13,IGHV3-11,IGHV3-7,IGHV2-26,IGHV2-5,IGHV1-58,IGHV1-24,IGHV1-18,TRBC2
2_Member	GO Biological Processes	GO:0002460	adaptive immune response based on somatic recombination of immune receptors built from immunoglobulin superfamily domains	-37.8412	-34.725	48/236	930,939,970,975,3265,3493,3494,3501,3502,3507,3514,3537,3538,3539,3542,3662,4063,7374,28385,28388,28391,28392,28394,28395,28400,28408,28409,28410,28412,28420,28423,28424,28426,28434,28439,28442,28444,28445,28448,28449,28450,28452,28455,28457,28464,28467,28468,28638	CD19,CD27,CD70,CD81,HRAS,IGHA1,IGHA2,IGHG2,IGHG3,IGHM,IGKC,IGLC1,IGLC2,IGLC3,IGLC6,IRF4,LY9,UNG,IGHV6-1,IGHV5-51,IGHV4-61,IGHV4-59,IGHV4-39,IGHV4-34,IGHV4-28,IGHV3-74,IGHV3-73,IGHV3-72,IGHV3-66,IGHV3-53,IGHV3-49,IGHV3-48,IGHV3-43,IGHV3-33,IGHV3-30,IGHV3-23,IGHV3-21,IGHV3-20,IGHV3-15,IGHV3-13,IGHV3-11,IGHV3-7,IGHV2-26,IGHV2-5,IGHV1-58,IGHV1-24,IGHV1-18,TRBC2
2_Member	GO Biological Processes	GO:0002429	immune response-activating cell surface receptor signaling pathway	-35.4717	-32.4038	47/249	930,973,3265,3493,3494,3501,3502,3507,3514,3537,3538,3539,3542,3932,5335,8631,28385,28388,28391,28392,28394,28395,28400,28408,28409,28410,28412,28420,28423,28424,28426,28434,28439,28442,28444,28445,28448,28449,28450,28452,28455,28457,28464,28467,28468,28638,29760	CD19,CD79A,HRAS,IGHA1,IGHA2,IGHG2,IGHG3,IGHM,IGKC,IGLC1,IGLC2,IGLC3,IGLC6,LCK,PLCG1,SKAP1,IGHV6-1,IGHV5-51,IGHV4-61,IGHV4-59,IGHV4-39,IGHV4-34,IGHV4-28,IGHV3-74,IGHV3-73,IGHV3-72,IGHV3-66,IGHV3-53,IGHV3-49,IGHV3-48,IGHV3-43,IGHV3-33,IGHV3-30,IGHV3-23,IGHV3-21,IGHV3-20,IGHV3-15,IGHV3-13,IGHV3-11,IGHV3-7,IGHV2-26,IGHV2-5,IGHV1-58,IGHV1-24,IGHV1-18,TRBC2,BLNK
2_Member	GO Biological Processes	GO:0002757	immune response-activating signal transduction	-35.4717	-32.4038	47/249	930,973,3265,3493,3494,3501,3502,3507,3514,3537,3538,3539,3542,3932,5335,8631,28385,28388,28391,28392,28394,28395,28400,28408,28409,28410,28412,28420,28423,28424,28426,28434,28439,28442,28444,28445,28448,28449,28450,28452,28455,28457,28464,28467,28468,28638,29760	CD19,CD79A,HRAS,IGHA1,IGHA2,IGHG2,IGHG3,IGHM,IGKC,IGLC1,IGLC2,IGLC3,IGLC6,LCK,PLCG1,SKAP1,IGHV6-1,IGHV5-51,IGHV4-61,IGHV4-59,IGHV4-39,IGHV4-34,IGHV4-28,IGHV3-74,IGHV3-73,IGHV3-72,IGHV3-66,IGHV3-53,IGHV3-49,IGHV3-48,IGHV3-43,IGHV3-33,IGHV3-30,IGHV3-23,IGHV3-21,IGHV3-20,IGHV3-15,IGHV3-13,IGHV3-11,IGHV3-7,IGHV2-26,IGHV2-5,IGHV1-58,IGHV1-24,IGHV1-18,TRBC2,BLNK
2_Member	GO Biological Processes	GO:0002449	lymphocyte mediated immunity	-35.0457	-32.0001	45/226	930,939,970,975,3493,3494,3501,3502,3507,3514,3537,3538,3539,3542,7374,28385,28388,28391,28392,28394,28395,28400,28408,28409,28410,28412,28420,28423,28424,28426,28434,28439,28442,28444,28445,28448,28449,28450,28452,28455,28457,28464,28467,28468,28638	CD19,CD27,CD70,CD81,IGHA1,IGHA2,IGHG2,IGHG3,IGHM,IGKC,IGLC1,IGLC2,IGLC3,IGLC6,UNG,IGHV6-1,IGHV5-51,IGHV4-61,IGHV4-59,IGHV4-39,IGHV4-34,IGHV4-28,IGHV3-74,IGHV3-73,IGHV3-72,IGHV3-66,IGHV3-53,IGHV3-49,IGHV3-48,IGHV3-43,IGHV3-33,IGHV3-30,IGHV3-23,IGHV3-21,IGHV3-20,IGHV3-15,IGHV3-13,IGHV3-11,IGHV3-7,IGHV2-26,IGHV2-5,IGHV1-58,IGHV1-24,IGHV1-18,TRBC2
2_Member	GO Biological Processes	GO:0002768	immune response-regulating cell surface receptor signaling pathway	-33.18	-30.1556	47/278	930,973,3265,3493,3494,3501,3502,3507,3514,3537,3538,3539,3542,3932,5335,8631,28385,28388,28391,28392,28394,28395,28400,28408,28409,28410,28412,28420,28423,28424,28426,28434,28439,28442,28444,28445,28448,28449,28450,28452,28455,28457,28464,28467,28468,28638,29760	CD19,CD79A,HRAS,IGHA1,IGHA2,IGHG2,IGHG3,IGHM,IGKC,IGLC1,IGLC2,IGLC3,IGLC6,LCK,PLCG1,SKAP1,IGHV6-1,IGHV5-51,IGHV4-61,IGHV4-59,IGHV4-39,IGHV4-34,IGHV4-28,IGHV3-74,IGHV3-73,IGHV3-72,IGHV3-66,IGHV3-53,IGHV3-49,IGHV3-48,IGHV3-43,IGHV3-33,IGHV3-30,IGHV3-23,IGHV3-21,IGHV3-20,IGHV3-15,IGHV3-13,IGHV3-11,IGHV3-7,IGHV2-26,IGHV2-5,IGHV1-58,IGHV1-24,IGHV1-18,TRBC2,BLNK
2_Member	GO Biological Processes	GO:0008037	cell recognition	-32.803	-29.7988	42/210	975,3493,3494,3501,3502,3507,3514,3537,3538,3539,3542,28385,28388,28391,28392,28394,28395,28400,28408,28409,28410,28412,28420,28423,28424,28426,28434,28439,28442,28444,28445,28448,28449,28450,28452,28455,28457,28464,28467,28468,28638,30815	CD81,IGHA1,IGHA2,IGHG2,IGHG3,IGHM,IGKC,IGLC1,IGLC2,IGLC3,IGLC6,IGHV6-1,IGHV5-51,IGHV4-61,IGHV4-59,IGHV4-39,IGHV4-34,IGHV4-28,IGHV3-74,IGHV3-73,IGHV3-72,IGHV3-66,IGHV3-53,IGHV3-49,IGHV3-48,IGHV3-43,IGHV3-33,IGHV3-30,IGHV3-23,IGHV3-21,IGHV3-20,IGHV3-15,IGHV3-13,IGHV3-11,IGHV3-7,IGHV2-26,IGHV2-5,IGHV1-58,IGHV1-24,IGHV1-18,TRBC2,ST6GALNAC6
2_Member	GO Biological Processes	GO:0002443	leukocyte mediated immunity	-32.6306	-29.6456	46/270	930,939,970,975,1636,3493,3494,3501,3502,3507,3514,3537,3538,3539,3542,7374,28385,28388,28391,28392,28394,28395,28400,28408,28409,28410,28412,28420,28423,28424,28426,28434,28439,28442,28444,28445,28448,28449,28450,28452,28455,28457,28464,28467,28468,28638	CD19,CD27,CD70,CD81,ACE,IGHA1,IGHA2,IGHG2,IGHG3,IGHM,IGKC,IGLC1,IGLC2,IGLC3,IGLC6,UNG,IGHV6-1,IGHV5-51,IGHV4-61,IGHV4-59,IGHV4-39,IGHV4-34,IGHV4-28,IGHV3-74,IGHV3-73,IGHV3-72,IGHV3-66,IGHV3-53,IGHV3-49,IGHV3-48,IGHV3-43,IGHV3-33,IGHV3-30,IGHV3-23,IGHV3-21,IGHV3-20,IGHV3-15,IGHV3-13,IGHV3-11,IGHV3-7,IGHV2-26,IGHV2-5,IGHV1-58,IGHV1-24,IGHV1-18,TRBC2
2_Member	GO Biological Processes	GO:0051251	positive regulation of lymphocyte activation	-31.4699	-28.5035	51/371	100,916,939,970,975,1725,3493,3494,3501,3502,3507,3514,3537,3538,3539,3542,3932,28385,28388,28391,28392,28394,28395,28400,28408,28409,28410,28412,28420,28423,28424,28426,28434,28439,28442,28444,28445,28448,28449,28450,28452,28455,28457,28464,28467,28468,28638,51293,84433,115352,115650	ADA,CD3E,CD27,CD70,CD81,DHPS,IGHA1,IGHA2,IGHG2,IGHG3,IGHM,IGKC,IGLC1,IGLC2,IGLC3,IGLC6,LCK,IGHV6-1,IGHV5-51,IGHV4-61,IGHV4-59,IGHV4-39,IGHV4-34,IGHV4-28,IGHV3-74,IGHV3-73,IGHV3-72,IGHV3-66,IGHV3-53,IGHV3-49,IGHV3-48,IGHV3-43,IGHV3-33,IGHV3-30,IGHV3-23,IGHV3-21,IGHV3-20,IGHV3-15,IGHV3-13,IGHV3-11,IGHV3-7,IGHV2-26,IGHV2-5,IGHV1-58,IGHV1-24,IGHV1-18,TRBC2,CD320,CARD11,FCRL3,TNFRSF13C
2_Member	GO Biological Processes	GO:0051249	regulation of lymphocyte activation	-31.2009	-28.2521	59/532	100,916,930,939,970,975,1725,2648,3493,3494,3501,3502,3507,3514,3537,3538,3539,3542,3662,3932,10039,22806,23495,23513,28385,28388,28391,28392,28394,28395,28400,28408,28409,28410,28412,28420,28423,28424,28426,28434,28439,28442,28444,28445,28448,28449,28450,28452,28455,28457,28464,28467,28468,28638,51237,51293,84433,115352,115650	ADA,CD3E,CD19,CD27,CD70,CD81,DHPS,KAT2A,IGHA1,IGHA2,IGHG2,IGHG3,IGHM,IGKC,IGLC1,IGLC2,IGLC3,IGLC6,IRF4,LCK,PARP3,IKZF3,TNFRSF13B,SCRIB,IGHV6-1,IGHV5-51,IGHV4-61,IGHV4-59,IGHV4-39,IGHV4-34,IGHV4-28,IGHV3-74,IGHV3-73,IGHV3-72,IGHV3-66,IGHV3-53,IGHV3-49,IGHV3-48,IGHV3-43,IGHV3-33,IGHV3-30,IGHV3-23,IGHV3-21,IGHV3-20,IGHV3-15,IGHV3-13,IGHV3-11,IGHV3-7,IGHV2-26,IGHV2-5,IGHV1-58,IGHV1-24,IGHV1-18,TRBC2,…
2_Member	GO Biological Processes	GO:0006959	humoral immune response	-30.0961	-27.1644	45/290	975,3493,3494,3501,3502,3507,3514,3537,3538,3539,3542,5450,6223,28385,28388,28391,28392,28394,28395,28400,28408,28409,28410,28412,28420,28423,28424,28426,28434,28439,28442,28444,28445,28448,28449,28450,28452,28455,28457,28464,28467,28468,28638,28912,29760	CD81,IGHA1,IGHA2,IGHG2,IGHG3,IGHM,IGKC,IGLC1,IGLC2,IGLC3,IGLC6,POU2AF1,RPS19,IGHV6-1,IGHV5-51,IGHV4-61,IGHV4-59,IGHV4-39,IGHV4-34,IGHV4-28,IGHV3-74,IGHV3-73,IGHV3-72,IGHV3-66,IGHV3-53,IGHV3-49,IGHV3-48,IGHV3-43,IGHV3-33,IGHV3-30,IGHV3-23,IGHV3-21,IGHV3-20,IGHV3-15,IGHV3-13,IGHV3-11,IGHV3-7,IGHV2-26,IGHV2-5,IGHV1-58,IGHV1-24,IGHV1-18,TRBC2,IGKV3-20,BLNK
2_Member	GO Biological Processes	GO:0002253	activation of immune response	-29.9503	-27.035	47/326	930,973,3265,3493,3494,3501,3502,3507,3514,3537,3538,3539,3542,3932,5335,8631,28385,28388,28391,28392,28394,28395,28400,28408,28409,28410,28412,28420,28423,28424,28426,28434,28439,28442,28444,28445,28448,28449,28450,28452,28455,28457,28464,28467,28468,28638,29760	CD19,CD79A,HRAS,IGHA1,IGHA2,IGHG2,IGHG3,IGHM,IGKC,IGLC1,IGLC2,IGLC3,IGLC6,LCK,PLCG1,SKAP1,IGHV6-1,IGHV5-51,IGHV4-61,IGHV4-59,IGHV4-39,IGHV4-34,IGHV4-28,IGHV3-74,IGHV3-73,IGHV3-72,IGHV3-66,IGHV3-53,IGHV3-49,IGHV3-48,IGHV3-43,IGHV3-33,IGHV3-30,IGHV3-23,IGHV3-21,IGHV3-20,IGHV3-15,IGHV3-13,IGHV3-11,IGHV3-7,IGHV2-26,IGHV2-5,IGHV1-58,IGHV1-24,IGHV1-18,TRBC2,BLNK
2_Member	GO Biological Processes	GO:0006909	phagocytosis	-29.6843	-26.7847	41/233	3493,3494,3501,3502,3507,3514,3537,3538,3539,3542,28385,28388,28391,28392,28394,28395,28400,28408,28409,28410,28412,28420,28423,28424,28426,28434,28439,28442,28444,28445,28448,28449,28450,28452,28455,28457,28464,28467,28468,28638,286046	IGHA1,IGHA2,IGHG2,IGHG3,IGHM,IGKC,IGLC1,IGLC2,IGLC3,IGLC6,IGHV6-1,IGHV5-51,IGHV4-61,IGHV4-59,IGHV4-39,IGHV4-34,IGHV4-28,IGHV3-74,IGHV3-73,IGHV3-72,IGHV3-66,IGHV3-53,IGHV3-49,IGHV3-48,IGHV3-43,IGHV3-33,IGHV3-30,IGHV3-23,IGHV3-21,IGHV3-20,IGHV3-15,IGHV3-13,IGHV3-11,IGHV3-7,IGHV2-26,IGHV2-5,IGHV1-58,IGHV1-24,IGHV1-18,TRBC2,XKR6
2_Member	GO Biological Processes	GO:0002764	immune response-regulating signaling pathway	-29.5137	-26.6294	48/351	930,973,3265,3493,3494,3501,3502,3507,3514,3537,3538,3539,3542,3661,3932,5335,8631,28385,28388,28391,28392,28394,28395,28400,28408,28409,28410,28412,28420,28423,28424,28426,28434,28439,28442,28444,28445,28448,28449,28450,28452,28455,28457,28464,28467,28468,28638,29760	CD19,CD79A,HRAS,IGHA1,IGHA2,IGHG2,IGHG3,IGHM,IGKC,IGLC1,IGLC2,IGLC3,IGLC6,IRF3,LCK,PLCG1,SKAP1,IGHV6-1,IGHV5-51,IGHV4-61,IGHV4-59,IGHV4-39,IGHV4-34,IGHV4-28,IGHV3-74,IGHV3-73,IGHV3-72,IGHV3-66,IGHV3-53,IGHV3-49,IGHV3-48,IGHV3-43,IGHV3-33,IGHV3-30,IGHV3-23,IGHV3-21,IGHV3-20,IGHV3-15,IGHV3-13,IGHV3-11,IGHV3-7,IGHV2-26,IGHV2-5,IGHV1-58,IGHV1-24,IGHV1-18,TRBC2,BLNK
2_Member	GO Biological Processes	GO:0002696	positive regulation of leukocyte activation	-28.7857	-25.9161	51/421	100,916,939,970,975,1725,3493,3494,3501,3502,3507,3514,3537,3538,3539,3542,3932,28385,28388,28391,28392,28394,28395,28400,28408,28409,28410,28412,28420,28423,28424,28426,28434,28439,28442,28444,28445,28448,28449,28450,28452,28455,28457,28464,28467,28468,28638,51293,84433,115352,115650	ADA,CD3E,CD27,CD70,CD81,DHPS,IGHA1,IGHA2,IGHG2,IGHG3,IGHM,IGKC,IGLC1,IGLC2,IGLC3,IGLC6,LCK,IGHV6-1,IGHV5-51,IGHV4-61,IGHV4-59,IGHV4-39,IGHV4-34,IGHV4-28,IGHV3-74,IGHV3-73,IGHV3-72,IGHV3-66,IGHV3-53,IGHV3-49,IGHV3-48,IGHV3-43,IGHV3-33,IGHV3-30,IGHV3-23,IGHV3-21,IGHV3-20,IGHV3-15,IGHV3-13,IGHV3-11,IGHV3-7,IGHV2-26,IGHV2-5,IGHV1-58,IGHV1-24,IGHV1-18,TRBC2,CD320,CARD11,FCRL3,TNFRSF13C
2_Member	GO Biological Processes	GO:0002694	regulation of leukocyte activation	-28.1346	-25.2792	60/629	100,916,930,939,970,975,1725,2648,3493,3494,3501,3502,3507,3514,3537,3538,3539,3542,3662,3932,9572,10039,22806,23495,23513,28385,28388,28391,28392,28394,28395,28400,28408,28409,28410,28412,28420,28423,28424,28426,28434,28439,28442,28444,28445,28448,28449,28450,28452,28455,28457,28464,28467,28468,28638,51237,51293,84433,115352,115650	ADA,CD3E,CD19,CD27,CD70,CD81,DHPS,KAT2A,IGHA1,IGHA2,IGHG2,IGHG3,IGHM,IGKC,IGLC1,IGLC2,IGLC3,IGLC6,IRF4,LCK,NR1D1,PARP3,IKZF3,TNFRSF13B,SCRIB,IGHV6-1,IGHV5-51,IGHV4-61,IGHV4-59,IGHV4-39,IGHV4-34,IGHV4-28,IGHV3-74,IGHV3-73,IGHV3-72,IGHV3-66,IGHV3-53,IGHV3-49,IGHV3-48,IGHV3-43,IGHV3-33,IGHV3-30,IGHV3-23,IGHV3-21,IGHV3-20,IGHV3-15,IGHV3-13,IGHV3-11,IGHV3-7,IGHV2-26,IGHV2-5,IGHV1-58,IGHV1-24,IGHV1-18,…
2_Member	GO Biological Processes	GO:0050867	positive regulation of cell activation	-28.0542	-25.2127	51/436	100,916,939,970,975,1725,3493,3494,3501,3502,3507,3514,3537,3538,3539,3542,3932,28385,28388,28391,28392,28394,28395,28400,28408,28409,28410,28412,28420,28423,28424,28426,28434,28439,28442,28444,28445,28448,28449,28450,28452,28455,28457,28464,28467,28468,28638,51293,84433,115352,115650	ADA,CD3E,CD27,CD70,CD81,DHPS,IGHA1,IGHA2,IGHG2,IGHG3,IGHM,IGKC,IGLC1,IGLC2,IGLC3,IGLC6,LCK,IGHV6-1,IGHV5-51,IGHV4-61,IGHV4-59,IGHV4-39,IGHV4-34,IGHV4-28,IGHV3-74,IGHV3-73,IGHV3-72,IGHV3-66,IGHV3-53,IGHV3-49,IGHV3-48,IGHV3-43,IGHV3-33,IGHV3-30,IGHV3-23,IGHV3-21,IGHV3-20,IGHV3-15,IGHV3-13,IGHV3-11,IGHV3-7,IGHV2-26,IGHV2-5,IGHV1-58,IGHV1-24,IGHV1-18,TRBC2,CD320,CARD11,FCRL3,TNFRSF13C
2_Member	GO Biological Processes	GO:0002252	immune effector process	-27.478	-24.6499	50/428	100,930,939,970,975,1636,3493,3494,3501,3502,3507,3514,3537,3538,3539,3542,3662,4063,5450,7374,28385,28388,28391,28392,28394,28395,28400,28408,28409,28410,28412,28420,28423,28424,28426,28434,28439,28442,28444,28445,28448,28449,28450,28452,28455,28457,28464,28467,28468,28638	ADA,CD19,CD27,CD70,CD81,ACE,IGHA1,IGHA2,IGHG2,IGHG3,IGHM,IGKC,IGLC1,IGLC2,IGLC3,IGLC6,IRF4,LY9,POU2AF1,UNG,IGHV6-1,IGHV5-51,IGHV4-61,IGHV4-59,IGHV4-39,IGHV4-34,IGHV4-28,IGHV3-74,IGHV3-73,IGHV3-72,IGHV3-66,IGHV3-53,IGHV3-49,IGHV3-48,IGHV3-43,IGHV3-33,IGHV3-30,IGHV3-23,IGHV3-21,IGHV3-20,IGHV3-15,IGHV3-13,IGHV3-11,IGHV3-7,IGHV2-26,IGHV2-5,IGHV1-58,IGHV1-24,IGHV1-18,TRBC2
2_Member	GO Biological Processes	GO:0050778	positive regulation of immune response	-26.4426	-23.6274	55/559	100,661,930,973,975,3265,3493,3494,3501,3502,3507,3514,3537,3538,3539,3542,3661,3783,3932,5335,6223,7186,8631,28385,28388,28391,28392,28394,28395,28400,28408,28409,28410,28412,28420,28423,28424,28426,28434,28439,28442,28444,28445,28448,28449,28450,28452,28455,28457,28464,28467,28468,28638,29760,84433	ADA,POLR3D,CD19,CD79A,CD81,HRAS,IGHA1,IGHA2,IGHG2,IGHG3,IGHM,IGKC,IGLC1,IGLC2,IGLC3,IGLC6,IRF3,KCNN4,LCK,PLCG1,RPS19,TRAF2,SKAP1,IGHV6-1,IGHV5-51,IGHV4-61,IGHV4-59,IGHV4-39,IGHV4-34,IGHV4-28,IGHV3-74,IGHV3-73,IGHV3-72,IGHV3-66,IGHV3-53,IGHV3-49,IGHV3-48,IGHV3-43,IGHV3-33,IGHV3-30,IGHV3-23,IGHV3-21,IGHV3-20,IGHV3-15,IGHV3-13,IGHV3-11,IGHV3-7,IGHV2-26,IGHV2-5,IGHV1-58,IGHV1-24,IGHV1-18,TRBC2,BLNK,C…
2_Member	GO Biological Processes	GO:0050865	regulation of cell activation	-26.2846	-23.4819	60/681	100,916,930,939,970,975,1725,2648,3493,3494,3501,3502,3507,3514,3537,3538,3539,3542,3662,3932,9572,10039,22806,23495,23513,28385,28388,28391,28392,28394,28395,28400,28408,28409,28410,28412,28420,28423,28424,28426,28434,28439,28442,28444,28445,28448,28449,28450,28452,28455,28457,28464,28467,28468,28638,51237,51293,84433,115352,115650	ADA,CD3E,CD19,CD27,CD70,CD81,DHPS,KAT2A,IGHA1,IGHA2,IGHG2,IGHG3,IGHM,IGKC,IGLC1,IGLC2,IGLC3,IGLC6,IRF4,LCK,NR1D1,PARP3,IKZF3,TNFRSF13B,SCRIB,IGHV6-1,IGHV5-51,IGHV4-61,IGHV4-59,IGHV4-39,IGHV4-34,IGHV4-28,IGHV3-74,IGHV3-73,IGHV3-72,IGHV3-66,IGHV3-53,IGHV3-49,IGHV3-48,IGHV3-43,IGHV3-33,IGHV3-30,IGHV3-23,IGHV3-21,IGHV3-20,IGHV3-15,IGHV3-13,IGHV3-11,IGHV3-7,IGHV2-26,IGHV2-5,IGHV1-58,IGHV1-24,IGHV1-18,…
2_Member	GO Biological Processes	GO:0042742	defense response to bacterium	-24.69	-21.8997	43/347	3493,3494,3501,3502,3507,3514,3537,3538,3539,3542,6223,28385,28388,28391,28392,28394,28395,28400,28408,28409,28410,28412,28420,28423,28424,28426,28434,28439,28442,28444,28445,28448,28449,28450,28452,28455,28457,28464,28467,28468,28638,28912,55876	IGHA1,IGHA2,IGHG2,IGHG3,IGHM,IGKC,IGLC1,IGLC2,IGLC3,IGLC6,RPS19,IGHV6-1,IGHV5-51,IGHV4-61,IGHV4-59,IGHV4-39,IGHV4-34,IGHV4-28,IGHV3-74,IGHV3-73,IGHV3-72,IGHV3-66,IGHV3-53,IGHV3-49,IGHV3-48,IGHV3-43,IGHV3-33,IGHV3-30,IGHV3-23,IGHV3-21,IGHV3-20,IGHV3-15,IGHV3-13,IGHV3-11,IGHV3-7,IGHV2-26,IGHV2-5,IGHV1-58,IGHV1-24,IGHV1-18,TRBC2,IGKV3-20,GSDMB
2_Member	GO Biological Processes	GO:0006897	endocytosis	-23.0353	-20.2568	48/489	274,975,3265,3493,3494,3501,3502,3507,3514,3537,3538,3539,3542,9026,23513,28385,28388,28391,28392,28394,28395,28400,28408,28409,28410,28412,28420,28423,28424,28426,28434,28439,28442,28444,28445,28448,28449,28450,28452,28455,28457,28464,28467,28468,28638,51293,133308,286046	BIN1,CD81,HRAS,IGHA1,IGHA2,IGHG2,IGHG3,IGHM,IGKC,IGLC1,IGLC2,IGLC3,IGLC6,HIP1R,SCRIB,IGHV6-1,IGHV5-51,IGHV4-61,IGHV4-59,IGHV4-39,IGHV4-34,IGHV4-28,IGHV3-74,IGHV3-73,IGHV3-72,IGHV3-66,IGHV3-53,IGHV3-49,IGHV3-48,IGHV3-43,IGHV3-33,IGHV3-30,IGHV3-23,IGHV3-21,IGHV3-20,IGHV3-15,IGHV3-13,IGHV3-11,IGHV3-7,IGHV2-26,IGHV2-5,IGHV1-58,IGHV1-24,IGHV1-18,TRBC2,CD320,SLC9B2,XKR6
2_Member	GO Biological Processes	GO:0009617	response to bacterium	-18.0264	-15.2595	51/726	1636,3297,3493,3494,3501,3502,3507,3514,3537,3538,3539,3542,3661,6223,9572,11009,22806,23641,28385,28388,28391,28392,28394,28395,28400,28408,28409,28410,28412,28420,28423,28424,28426,28434,28439,28442,28444,28445,28448,28449,28450,28452,28455,28457,28464,28467,28468,28638,28912,55876,389643	ACE,HSF1,IGHA1,IGHA2,IGHG2,IGHG3,IGHM,IGKC,IGLC1,IGLC2,IGLC3,IGLC6,IRF3,RPS19,NR1D1,IL24,IKZF3,LDOC1,IGHV6-1,IGHV5-51,IGHV4-61,IGHV4-59,IGHV4-39,IGHV4-34,IGHV4-28,IGHV3-74,IGHV3-73,IGHV3-72,IGHV3-66,IGHV3-53,IGHV3-49,IGHV3-48,IGHV3-43,IGHV3-33,IGHV3-30,IGHV3-23,IGHV3-21,IGHV3-20,IGHV3-15,IGHV3-13,IGHV3-11,IGHV3-7,IGHV2-26,IGHV2-5,IGHV1-58,IGHV1-24,IGHV1-18,TRBC2,IGKV3-20,GSDMB,NUGGC
2_Member	GO Biological Processes	GO:0045087	innate immune response	-17.0944	-14.3388	51/764	661,3493,3494,3501,3502,3507,3514,3537,3538,3539,3542,3661,3932,4063,6472,9618,10155,28385,28388,28391,28392,28394,28395,28400,28408,28409,28410,28412,28420,28423,28424,28426,28434,28439,28442,28444,28445,28448,28449,28450,28452,28455,28457,28464,28467,28468,28638,55210,55337,140564,200316	POLR3D,IGHA1,IGHA2,IGHG2,IGHG3,IGHM,IGKC,IGLC1,IGLC2,IGLC3,IGLC6,IRF3,LCK,LY9,SHMT2,TRAF4,TRIM28,IGHV6-1,IGHV5-51,IGHV4-61,IGHV4-59,IGHV4-39,IGHV4-34,IGHV4-28,IGHV3-74,IGHV3-73,IGHV3-72,IGHV3-66,IGHV3-53,IGHV3-49,IGHV3-48,IGHV3-43,IGHV3-33,IGHV3-30,IGHV3-23,IGHV3-21,IGHV3-20,IGHV3-15,IGHV3-13,IGHV3-11,IGHV3-7,IGHV2-26,IGHV2-5,IGHV1-58,IGHV1-24,IGHV1-18,TRBC2,ATAD3A,SHFL,APOBEC3D,APOBEC3F
2_Member	GO Biological Processes	GO:0061024	membrane organization	-15.5164	-12.7718	49/774	21,274,3493,3494,3501,3502,3507,3514,3537,3538,3539,3542,3783,9026,28385,28388,28391,28392,28394,28395,28400,28408,28409,28410,28412,28420,28423,28424,28426,28434,28439,28442,28444,28445,28448,28449,28450,28452,28455,28457,28464,28467,28468,28638,51016,84303,286046,338440,400916	ABCA3,BIN1,IGHA1,IGHA2,IGHG2,IGHG3,IGHM,IGKC,IGLC1,IGLC2,IGLC3,IGLC6,KCNN4,HIP1R,IGHV6-1,IGHV5-51,IGHV4-61,IGHV4-59,IGHV4-39,IGHV4-34,IGHV4-28,IGHV3-74,IGHV3-73,IGHV3-72,IGHV3-66,IGHV3-53,IGHV3-49,IGHV3-48,IGHV3-43,IGHV3-33,IGHV3-30,IGHV3-23,IGHV3-21,IGHV3-20,IGHV3-15,IGHV3-13,IGHV3-11,IGHV3-7,IGHV2-26,IGHV2-5,IGHV1-58,IGHV1-24,IGHV1-18,TRBC2,EMC9,CHCHD6,XKR6,ANO9,CHCHD10
3_Summary	GO Biological Processes	GO:0034660	ncRNA metabolic process	-9.10897	-6.37507	29/470	16,2091,4839,6130,6223,6234,7407,8565,8568,9045,10528,10667,23246,51593,54606,55621,55661,56342,57176,57505,65095,79863,80755,81887,81890,114049,155400,317781,348180,6147,22907,51116,3326,8175,8607,25804,8086,11273,23354,55722,80152,90990,124093,21,3911,22994,25930,26160,64753,85302,89891	AARS1,FBL,NOP2,RPL7A,RPS19,RPS28,VARS1,YARS1,RRP1,RPL14,NOP56,FARS2,BOP1,SRRT,DDX56,TRMT1,DDX27,PPAN,VARS2,AARS2,KRI1,RBFA,AARSD1,LAS1L,QTRT1,BUD23,NSUN5P1,DDX51,CTU2,RPL23A,DHX30,MRPS2,HSP90AB1,SF3A2,RUVBL1,LSM4,AAAS,ATXN2L,HAUS5,CEP72,CENPT,KIFC2,CCDC78,ABCA3,LAMA5,CEP131,PTPN23,IFT172,CCDC136,FBF1,DYNC2I2
3_Member	GO Biological Processes	GO:0034660	ncRNA metabolic process	-9.10897	-6.37507	29/470	16,2091,4839,6130,6223,6234,7407,8565,8568,9045,10528,10667,23246,51593,54606,55621,55661,56342,57176,57505,65095,79863,80755,81887,81890,114049,155400,317781,348180	AARS1,FBL,NOP2,RPL7A,RPS19,RPS28,VARS1,YARS1,RRP1,RPL14,NOP56,FARS2,BOP1,SRRT,DDX56,TRMT1,DDX27,PPAN,VARS2,AARS2,KRI1,RBFA,AARSD1,LAS1L,QTRT1,BUD23,NSUN5P1,DDX51,CTU2
3_Member	GO Biological Processes	GO:0034470	ncRNA processing	-8.39875	-5.70445	25/384	16,2091,4839,6130,6223,6234,8568,9045,10528,10667,23246,51593,54606,55621,55661,56342,57505,65095,79863,81887,81890,114049,155400,317781,348180	AARS1,FBL,NOP2,RPL7A,RPS19,RPS28,RRP1,RPL14,NOP56,FARS2,BOP1,SRRT,DDX56,TRMT1,DDX27,PPAN,AARS2,KRI1,RBFA,LAS1L,QTRT1,BUD23,NSUN5P1,DDX51,CTU2
3_Member	GO Biological Processes	GO:0042254	ribosome biogenesis	-7.86958	-5.23046	21/293	2091,4839,6130,6147,6223,6234,8568,9045,10528,22907,23246,51116,54606,55661,56342,65095,79863,81887,114049,155400,317781	FBL,NOP2,RPL7A,RPL23A,RPS19,RPS28,RRP1,RPL14,NOP56,DHX30,BOP1,MRPS2,DDX56,DDX27,PPAN,KRI1,RBFA,LAS1L,BUD23,NSUN5P1,DDX51
3_Member	GO Biological Processes	GO:0006364	rRNA processing	-7.77125	-5.14057	18/218	2091,4839,6130,6223,6234,8568,9045,10528,23246,54606,55661,56342,65095,79863,81887,114049,155400,317781	FBL,NOP2,RPL7A,RPS19,RPS28,RRP1,RPL14,NOP56,BOP1,DDX56,DDX27,PPAN,KRI1,RBFA,LAS1L,BUD23,NSUN5P1,DDX51
3_Member	GO Biological Processes	GO:0016072	rRNA metabolic process	-7.44095	-4.85014	18/229	2091,4839,6130,6223,6234,8568,9045,10528,23246,54606,55661,56342,65095,79863,81887,114049,155400,317781	FBL,NOP2,RPL7A,RPS19,RPS28,RRP1,RPL14,NOP56,BOP1,DDX56,DDX27,PPAN,KRI1,RBFA,LAS1L,BUD23,NSUN5P1,DDX51
3_Member	GO Biological Processes	GO:0022613	ribonucleoprotein complex biogenesis	-7.15826	-4.575	25/444	2091,3326,4839,6130,6147,6223,6234,8175,8568,8607,9045,10528,22907,23246,25804,51116,54606,55661,56342,65095,79863,81887,114049,155400,317781	FBL,HSP90AB1,NOP2,RPL7A,RPL23A,RPS19,RPS28,SF3A2,RRP1,RUVBL1,RPL14,NOP56,DHX30,BOP1,LSM4,MRPS2,DDX56,DDX27,PPAN,KRI1,RBFA,LAS1L,BUD23,NSUN5P1,DDX51
3_Member	GO Biological Processes	GO:0042255	ribosome assembly	-5.19438	-2.77198	8/62	4839,6147,6223,6234,22907,23246,51116,56342	NOP2,RPL23A,RPS19,RPS28,DHX30,BOP1,MRPS2,PPAN
3_Member	GO Biological Processes	GO:0042273	ribosomal large subunit biogenesis	-4.70595	-2.35926	8/72	4839,6130,6147,9045,22907,23246,56342,81887	NOP2,RPL7A,RPL23A,RPL14,DHX30,BOP1,PPAN,LAS1L
3_Member	GO Biological Processes	GO:0140694	non-membrane-bounded organelle assembly	-4.34079	-2.02348	16/310	4839,6147,6223,6234,8086,11273,22907,23246,23354,25804,51116,55722,56342,80152,90990,124093	NOP2,RPL23A,RPS19,RPS28,AAAS,ATXN2L,DHX30,BOP1,HAUS5,LSM4,MRPS2,CEP72,PPAN,CENPT,KIFC2,CCDC78
3_Member	GO Biological Processes	GO:0000027	ribosomal large subunit assembly	-4.20928	-1.91568	5/27	4839,6147,22907,23246,56342	NOP2,RPL23A,DHX30,BOP1,PPAN
3_Member	GO Biological Processes	GO:0022618	ribonucleoprotein complex assembly	-3.28579	-1.11808	11/206	3326,4839,6147,6223,6234,8175,8607,22907,23246,25804,56342	HSP90AB1,NOP2,RPL23A,RPS19,RPS28,SF3A2,RUVBL1,DHX30,BOP1,LSM4,PPAN
3_Member	GO Biological Processes	GO:0071826	ribonucleoprotein complex subunit organization	-3.16525	-1.04387	11/213	3326,4839,6147,6223,6234,8175,8607,22907,23246,25804,56342	HSP90AB1,NOP2,RPL23A,RPS19,RPS28,SF3A2,RUVBL1,DHX30,BOP1,LSM4,PPAN
3_Member	GO Biological Processes	GO:0000470	maturation of LSU-rRNA	-3.01124	-0.919828	4/28	4839,6130,23246,81887	NOP2,RPL7A,BOP1,LAS1L
3_Member	GO Biological Processes	GO:0070925	organelle assembly	-2.86786	-0.828674	24/760	21,3911,4839,6147,6223,6234,8086,11273,22907,22994,23246,23354,25804,25930,26160,51116,55722,56342,64753,80152,85302,89891,90990,124093	ABCA3,LAMA5,NOP2,RPL23A,RPS19,RPS28,AAAS,ATXN2L,DHX30,CEP131,BOP1,HAUS5,LSM4,PTPN23,IFT172,MRPS2,CEP72,PPAN,CCDC136,CENPT,FBF1,DYNC2I2,KIFC2,CCDC78
4_Summary	Reactome Gene Sets	R-HSA-8953854	Metabolism of RNA	-8.8842	-6.16076	35/673	2091,4839,5437,6130,6132,6141,6143,6147,6168,6223,6234,6626,6638,6829,8086,8175,8568,9045,10212,10528,23225,23246,23450,23511,25804,25873,27043,29894,51593,55621,56006,81887,81890,114049,348180,16,23,1725,2686,7407,8565,9524,10667,10985,30815,51116,55627,57176,57505,57571,65005,80755,84532,142,100,1636,6472,7064,11332,23457,80221,64978,6949,3661,5335,1285,1286,1741,3265,3326,5361,6709,51466,55558…	FBL,NOP2,POLR2H,RPL7A,RPL8,RPL18,RPL19,RPL23A,RPL37A,RPS19,RPS28,SNRPA,SNRPN,SUPT5H,AAAS,SF3A2,RRP1,RPL14,DDX39A,NOP56,NUP210,BOP1,SF3B3,NUP188,LSM4,RPL36,PELP1,CPSF1,SRRT,TRMT1,SMG9,LAS1L,QTRT1,BUD23,CTU2,AARS1,ABCF1,DHPS,GGT7,VARS1,YARS1,TECR,FARS2,GCN1,ST6GALNAC6,MRPS2,SMPD4,VARS2,AARS2,CARNS1,MRPL9,AARSD1,ACSS1,PARP1,ADA,ACE,SHMT2,THOP1,ACOT7,ABCB9,ACSF2,MRPL38,TCOF1,IRF3,PLCG1,COL4A3,COL4A4,…
4_Member	Reactome Gene Sets	R-HSA-8953854	Metabolism of RNA	-8.8842	-6.16076	35/673	2091,4839,5437,6130,6132,6141,6143,6147,6168,6223,6234,6626,6638,6829,8086,8175,8568,9045,10212,10528,23225,23246,23450,23511,25804,25873,27043,29894,51593,55621,56006,81887,81890,114049,348180	FBL,NOP2,POLR2H,RPL7A,RPL8,RPL18,RPL19,RPL23A,RPL37A,RPS19,RPS28,SNRPA,SNRPN,SUPT5H,AAAS,SF3A2,RRP1,RPL14,DDX39A,NOP56,NUP210,BOP1,SF3B3,NUP188,LSM4,RPL36,PELP1,CPSF1,SRRT,TRMT1,SMG9,LAS1L,QTRT1,BUD23,CTU2
4_Member	Reactome Gene Sets	R-HSA-8868773	rRNA processing in the nucleus and cytosol	-8.5703	-5.85708	18/194	2091,4839,6130,6132,6141,6143,6147,6168,6223,6234,8568,9045,10528,23246,25873,27043,81887,114049	FBL,NOP2,RPL7A,RPL8,RPL18,RPL19,RPL23A,RPL37A,RPS19,RPS28,RRP1,RPL14,NOP56,BOP1,RPL36,PELP1,LAS1L,BUD23
4_Member	GO Biological Processes	GO:0043604	amide biosynthetic process	-8.39792	-5.70445	28/474	16,23,1725,2686,6130,6132,6141,6143,6147,6168,6223,6234,7407,8565,9045,9524,10667,10985,25873,30815,51116,55627,57176,57505,57571,65005,80755,84532	AARS1,ABCF1,DHPS,GGT7,RPL7A,RPL8,RPL18,RPL19,RPL23A,RPL37A,RPS19,RPS28,VARS1,YARS1,RPL14,TECR,FARS2,GCN1,RPL36,ST6GALNAC6,MRPS2,SMPD4,VARS2,AARS2,CARNS1,MRPL9,AARSD1,ACSS1
4_Member	Reactome Gene Sets	R-HSA-168273	Influenza Viral RNA Transcription and Replication	-8.31059	-5.63583	15/135	142,5437,6130,6132,6141,6143,6147,6168,6223,6234,8086,9045,23225,23511,25873	PARP1,POLR2H,RPL7A,RPL8,RPL18,RPL19,RPL23A,RPL37A,RPS19,RPS28,AAAS,RPL14,NUP210,NUP188,RPL36
4_Member	GO Biological Processes	GO:0043043	peptide biosynthetic process	-8.31042	-5.63583	24/359	16,23,1725,2686,6130,6132,6141,6143,6147,6168,6223,6234,7407,8565,9045,10667,10985,25873,51116,57176,57505,57571,65005,80755	AARS1,ABCF1,DHPS,GGT7,RPL7A,RPL8,RPL18,RPL19,RPL23A,RPL37A,RPS19,RPS28,VARS1,YARS1,RPL14,FARS2,GCN1,RPL36,MRPS2,VARS2,AARS2,CARNS1,MRPL9,AARSD1
4_Member	Reactome Gene Sets	R-HSA-72312	rRNA processing	-8.22319	-5.55775	18/204	2091,4839,6130,6132,6141,6143,6147,6168,6223,6234,8568,9045,10528,23246,25873,27043,81887,114049	FBL,NOP2,RPL7A,RPL8,RPL18,RPL19,RPL23A,RPL37A,RPS19,RPS28,RRP1,RPL14,NOP56,BOP1,RPL36,PELP1,LAS1L,BUD23
4_Member	Reactome Gene Sets	R-HSA-6791226	Major pathway of rRNA processing in the nucleolus and cytosol	-8.10095	-5.45324	17/184	2091,6130,6132,6141,6143,6147,6168,6223,6234,8568,9045,10528,23246,25873,27043,81887,114049	FBL,RPL7A,RPL8,RPL18,RPL19,RPL23A,RPL37A,RPS19,RPS28,RRP1,RPL14,NOP56,BOP1,RPL36,PELP1,LAS1L,BUD23
4_Member	GO Biological Processes	GO:0043603	cellular amide metabolic process	-7.68859	-5.06618	35/750	16,23,100,1636,1725,2686,6130,6132,6141,6143,6147,6168,6223,6234,6472,7064,7407,8565,9045,9524,10667,10985,11332,23457,25873,30815,51116,55627,57176,57505,57571,65005,80221,80755,84532	AARS1,ABCF1,ADA,ACE,DHPS,GGT7,RPL7A,RPL8,RPL18,RPL19,RPL23A,RPL37A,RPS19,RPS28,SHMT2,THOP1,VARS1,YARS1,RPL14,TECR,FARS2,GCN1,ACOT7,ABCB9,RPL36,ST6GALNAC6,MRPS2,SMPD4,VARS2,AARS2,CARNS1,MRPL9,ACSF2,AARSD1,ACSS1
4_Member	GO Biological Processes	GO:0006412	translation	-7.59983	-4.98554	22/332	16,23,1725,6130,6132,6141,6143,6147,6168,6223,6234,7407,8565,9045,10667,10985,25873,51116,57176,57505,65005,80755	AARS1,ABCF1,DHPS,RPL7A,RPL8,RPL18,RPL19,RPL23A,RPL37A,RPS19,RPS28,VARS1,YARS1,RPL14,FARS2,GCN1,RPL36,MRPS2,VARS2,AARS2,MRPL9,AARSD1
4_Member	GO Biological Processes	GO:0006518	peptide metabolic process	-7.50846	-4.90214	27/489	16,23,1636,1725,2686,6130,6132,6141,6143,6147,6168,6223,6234,7064,7407,8565,9045,10667,10985,23457,25873,51116,57176,57505,57571,65005,80755	AARS1,ABCF1,ACE,DHPS,GGT7,RPL7A,RPL8,RPL18,RPL19,RPL23A,RPL37A,RPS19,RPS28,THOP1,VARS1,YARS1,RPL14,FARS2,GCN1,ABCB9,RPL36,MRPS2,VARS2,AARS2,CARNS1,MRPL9,AARSD1
4_Member	Reactome Gene Sets	R-HSA-168255	Influenza Infection	-7.45287	-4.85437	15/156	142,5437,6130,6132,6141,6143,6147,6168,6223,6234,8086,9045,23225,23511,25873	PARP1,POLR2H,RPL7A,RPL8,RPL18,RPL19,RPL23A,RPL37A,RPS19,RPS28,AAAS,RPL14,NUP210,NUP188,RPL36
4_Member	Reactome Gene Sets	R-HSA-72766	Translation	-6.54813	-3.97229	19/291	16,6130,6132,6141,6143,6147,6168,6223,6234,7407,8565,9045,10667,25873,51116,57176,57505,64978,65005	AARS1,RPL7A,RPL8,RPL18,RPL19,RPL23A,RPL37A,RPS19,RPS28,VARS1,YARS1,RPL14,FARS2,RPL36,MRPS2,VARS2,AARS2,MRPL38,MRPL9
4_Member	CORUM	CORUM:306	Ribosome, cytoplasmic	-6.2202	-3.65167	10/80	6130,6132,6141,6143,6147,6168,6223,6234,9045,25873	RPL7A,RPL8,RPL18,RPL19,RPL23A,RPL37A,RPS19,RPS28,RPL14,RPL36
4_Member	Reactome Gene Sets	R-HSA-9633012	Response of EIF2AK4 (GCN2) to amino acid deficiency	-6.16826	-3.60691	11/101	6130,6132,6141,6143,6147,6168,6223,6234,9045,10985,25873	RPL7A,RPL8,RPL18,RPL19,RPL23A,RPL37A,RPS19,RPS28,RPL14,GCN1,RPL36
4_Member	CORUM	CORUM:308	60S ribosomal subunit, cytoplasmic	-6.13484	-3.58054	8/47	6130,6132,6141,6143,6147,6168,9045,25873	RPL7A,RPL8,RPL18,RPL19,RPL23A,RPL37A,RPL14,RPL36
4_Member	CORUM	CORUM:3055	Nop56p-associated pre-rRNA complex	-6.03976	-3.50599	11/104	2091,6130,6132,6141,6143,6147,6168,6949,9045,10528,25873	FBL,RPL7A,RPL8,RPL18,RPL19,RPL23A,RPL37A,TCOF1,RPL14,NOP56,RPL36
4_Member	Reactome Gene Sets	R-HSA-156902	Peptide chain elongation	-5.7861	-3.27826	10/89	6130,6132,6141,6143,6147,6168,6223,6234,9045,25873	RPL7A,RPL8,RPL18,RPL19,RPL23A,RPL37A,RPS19,RPS28,RPL14,RPL36
4_Member	Reactome Gene Sets	R-HSA-192823	Viral mRNA Translation	-5.7861	-3.27826	10/89	6130,6132,6141,6143,6147,6168,6223,6234,9045,25873	RPL7A,RPL8,RPL18,RPL19,RPL23A,RPL37A,RPS19,RPS28,RPL14,RPL36
4_Member	WikiPathways	WP477	Cytoplasmic ribosomal proteins	-5.74112	-3.23954	10/90	6130,6132,6141,6143,6147,6168,6223,6234,9045,25873	RPL7A,RPL8,RPL18,RPL19,RPL23A,RPL37A,RPS19,RPS28,RPL14,RPL36
4_Member	Reactome Gene Sets	R-HSA-156842	Eukaryotic Translation Elongation	-5.60972	-3.13788	10/93	6130,6132,6141,6143,6147,6168,6223,6234,9045,25873	RPL7A,RPL8,RPL18,RPL19,RPL23A,RPL37A,RPS19,RPS28,RPL14,RPL36
4_Member	Reactome Gene Sets	R-HSA-2408557	Selenocysteine synthesis	-5.60972	-3.13788	10/93	6130,6132,6141,6143,6147,6168,6223,6234,9045,25873	RPL7A,RPL8,RPL18,RPL19,RPL23A,RPL37A,RPS19,RPS28,RPL14,RPL36
4_Member	Reactome Gene Sets	R-HSA-72764	Eukaryotic Translation Termination	-5.60972	-3.13788	10/93	6130,6132,6141,6143,6147,6168,6223,6234,9045,25873	RPL7A,RPL8,RPL18,RPL19,RPL23A,RPL37A,RPS19,RPS28,RPL14,RPL36
4_Member	Reactome Gene Sets	R-HSA-927802	Nonsense-Mediated Decay (NMD)	-5.60435	-3.13788	11/115	6130,6132,6141,6143,6147,6168,6223,6234,9045,25873,56006	RPL7A,RPL8,RPL18,RPL19,RPL23A,RPL37A,RPS19,RPS28,RPL14,RPL36,SMG9
4_Member	Reactome Gene Sets	R-HSA-975957	Nonsense Mediated Decay (NMD) enhanced by the Exon Junction Complex (EJC)	-5.60435	-3.13788	11/115	6130,6132,6141,6143,6147,6168,6223,6234,9045,25873,56006	RPL7A,RPL8,RPL18,RPL19,RPL23A,RPL37A,RPS19,RPS28,RPL14,RPL36,SMG9
4_Member	Reactome Gene Sets	R-HSA-975956	Nonsense Mediated Decay (NMD) independent of the Exon Junction Complex (EJC)	-5.52492	-3.06472	10/95	6130,6132,6141,6143,6147,6168,6223,6234,9045,25873	RPL7A,RPL8,RPL18,RPL19,RPL23A,RPL37A,RPS19,RPS28,RPL14,RPL36
4_Member	Reactome Gene Sets	R-HSA-72689	Formation of a pool of free 40S subunits	-5.2829	-2.85002	10/101	6130,6132,6141,6143,6147,6168,6223,6234,9045,25873	RPL7A,RPL8,RPL18,RPL19,RPL23A,RPL37A,RPS19,RPS28,RPL14,RPL36
4_Member	KEGG Pathway	hsa03010	Ribosome	-5.01105	-2.60885	12/158	6130,6132,6141,6143,6147,6168,6223,6234,9045,25873,51116,65005	RPL7A,RPL8,RPL18,RPL19,RPL23A,RPL37A,RPS19,RPS28,RPL14,RPL36,MRPS2,MRPL9
4_Member	Reactome Gene Sets	R-HSA-156827	L13a-mediated translational silencing of Ceruloplasmin expression	-4.91599	-2.52834	10/111	6130,6132,6141,6143,6147,6168,6223,6234,9045,25873	RPL7A,RPL8,RPL18,RPL19,RPL23A,RPL37A,RPS19,RPS28,RPL14,RPL36
4_Member	GO Biological Processes	GO:0002181	cytoplasmic translation	-4.88153	-2.51257	10/112	6130,6132,6141,6143,6147,6168,6223,6234,9045,25873	RPL7A,RPL8,RPL18,RPL19,RPL23A,RPL37A,RPS19,RPS28,RPL14,RPL36
4_Member	Reactome Gene Sets	R-HSA-1799339	SRP-dependent cotranslational protein targeting to membrane	-4.88153	-2.51257	10/112	6130,6132,6141,6143,6147,6168,6223,6234,9045,25873	RPL7A,RPL8,RPL18,RPL19,RPL23A,RPL37A,RPS19,RPS28,RPL14,RPL36
4_Member	Reactome Gene Sets	R-HSA-72706	GTP hydrolysis and joining of the 60S ribosomal subunit	-4.88153	-2.51257	10/112	6130,6132,6141,6143,6147,6168,6223,6234,9045,25873	RPL7A,RPL8,RPL18,RPL19,RPL23A,RPL37A,RPS19,RPS28,RPL14,RPL36
4_Member	Reactome Gene Sets	R-HSA-2408522	Selenoamino acid metabolism	-4.68245	-2.34009	10/118	6130,6132,6141,6143,6147,6168,6223,6234,9045,25873	RPL7A,RPL8,RPL18,RPL19,RPL23A,RPL37A,RPS19,RPS28,RPL14,RPL36
4_Member	Reactome Gene Sets	R-HSA-72613	Eukaryotic Translation Initiation	-4.65049	-2.31664	10/119	6130,6132,6141,6143,6147,6168,6223,6234,9045,25873	RPL7A,RPL8,RPL18,RPL19,RPL23A,RPL37A,RPS19,RPS28,RPL14,RPL36
4_Member	Reactome Gene Sets	R-HSA-72737	Cap-dependent Translation Initiation	-4.65049	-2.31664	10/119	6130,6132,6141,6143,6147,6168,6223,6234,9045,25873	RPL7A,RPL8,RPL18,RPL19,RPL23A,RPL37A,RPS19,RPS28,RPL14,RPL36
4_Member	CORUM	CORUM:5380	TRBP containing complex (DICER, RPL7A, EIF6, MOV10 and subunits of the 60S ribosomal particle)	-4.37953	-2.05404	5/25	6130,6143,6168,9045,25873	RPL7A,RPL19,RPL37A,RPL14,RPL36
4_Member	Reactome Gene Sets	R-HSA-9711097	Cellular response to starvation	-4.3442	-2.02348	11/156	6130,6132,6141,6143,6147,6168,6223,6234,9045,10985,25873	RPL7A,RPL8,RPL18,RPL19,RPL23A,RPL37A,RPS19,RPS28,RPL14,GCN1,RPL36
4_Member	KEGG Pathway	hsa05171	Coronavirus disease - COVID-19	-3.98822	-1.71708	13/232	1636,3661,5335,6130,6132,6141,6143,6147,6168,6223,6234,9045,25873	ACE,IRF3,PLCG1,RPL7A,RPL8,RPL18,RPL19,RPL23A,RPL37A,RPS19,RPS28,RPL14,RPL36
4_Member	Reactome Gene Sets	R-HSA-9010553	Regulation of expression of SLITs and ROBOs	-3.34272	-1.1574	10/171	6130,6132,6141,6143,6147,6168,6223,6234,9045,25873	RPL7A,RPL8,RPL18,RPL19,RPL23A,RPL37A,RPS19,RPS28,RPL14,RPL36
4_Member	Reactome Gene Sets	R-HSA-422475	Axon guidance	-3.18137	-1.05343	20/552	1285,1286,1741,3265,3326,5335,5361,6130,6132,6141,6143,6147,6168,6223,6234,6709,9045,25873,51466,55558	COL4A3,COL4A4,DLG3,HRAS,HSP90AB1,PLCG1,PLXNA1,RPL7A,RPL8,RPL18,RPL19,RPL23A,RPL37A,RPS19,RPS28,SPTAN1,RPL14,RPL36,EVL,PLXNA3
4_Member	Reactome Gene Sets	R-HSA-376176	Signaling by ROBO receptors	-3.08246	-0.973823	11/218	6130,6132,6141,6143,6147,6168,6223,6234,9045,25873,51466	RPL7A,RPL8,RPL18,RPL19,RPL23A,RPL37A,RPS19,RPS28,RPL14,RPL36,EVL
4_Member	Reactome Gene Sets	R-HSA-71291	Metabolism of amino acids and derivatives	-2.94933	-0.877776	15/374	2805,2806,5832,6130,6132,6141,6143,6147,6168,6223,6234,6723,9045,25873,57571	GOT1,GOT2,ALDH18A1,RPL7A,RPL8,RPL18,RPL19,RPL23A,RPL37A,RPS19,RPS28,SRM,RPL14,RPL36,CARNS1
4_Member	Reactome Gene Sets	R-HSA-9675108	Nervous system development	-2.948	-0.877776	20/577	1285,1286,1741,3265,3326,5335,5361,6130,6132,6141,6143,6147,6168,6223,6234,6709,9045,25873,51466,55558	COL4A3,COL4A4,DLG3,HRAS,HSP90AB1,PLCG1,PLXNA1,RPL7A,RPL8,RPL18,RPL19,RPL23A,RPL37A,RPS19,RPS28,SPTAN1,RPL14,RPL36,EVL,PLXNA3
4_Member	Reactome Gene Sets	R-HSA-2262752	Cellular responses to stress	-2.89068	-0.84377	24/757	1911,3159,3297,3326,6130,6132,6141,6143,6147,6168,6223,6234,7466,8086,9045,9572,10525,10919,10963,10985,23225,23511,25873,100137049	PHC1,HMGA1,HSF1,HSP90AB1,RPL7A,RPL8,RPL18,RPL19,RPL23A,RPL37A,RPS19,RPS28,WFS1,AAAS,RPL14,NR1D1,HYOU1,EHMT2,STIP1,GCN1,NUP210,NUP188,RPL36,PLA2G4B
4_Member	Reactome Gene Sets	R-HSA-8953897	Cellular responses to stimuli	-2.7856	-0.773371	24/771	1911,3159,3297,3326,6130,6132,6141,6143,6147,6168,6223,6234,7466,8086,9045,9572,10525,10919,10963,10985,23225,23511,25873,100137049	PHC1,HMGA1,HSF1,HSP90AB1,RPL7A,RPL8,RPL18,RPL19,RPL23A,RPL37A,RPS19,RPS28,WFS1,AAAS,RPL14,NR1D1,HYOU1,EHMT2,STIP1,GCN1,NUP210,NUP188,RPL36,PLA2G4B
5_Summary	KEGG Pathway	hsa05340	Primary immunodeficiency	-8.16465	-5.50817	9/38	100,916,930,973,3932,7374,23495,29760,115650,975,3265,3662,5335,11184,84433,3710,5533,23368,970,2841,3615,4063,5450,7163,22806,23513,142,1636	ADA,CD3E,CD19,CD79A,LCK,UNG,TNFRSF13B,BLNK,TNFRSF13C,CD81,HRAS,IRF4,PLCG1,MAP4K1,CARD11,ITPR3,PPP3CC,PPP1R13B,CD70,GPR18,IMPDH2,LY9,POU2AF1,TPD52,IKZF3,SCRIB,PARP1,ACE
5_Member	KEGG Pathway	hsa05340	Primary immunodeficiency	-8.16465	-5.50817	9/38	100,916,930,973,3932,7374,23495,29760,115650	ADA,CD3E,CD19,CD79A,LCK,UNG,TNFRSF13B,BLNK,TNFRSF13C
5_Member	WikiPathways	WP23	B cell receptor signaling pathway	-5.40167	-2.95807	10/98	930,973,975,3265,3662,3932,5335,11184,29760,84433	CD19,CD79A,CD81,HRAS,IRF4,LCK,PLCG1,MAP4K1,BLNK,CARD11
5_Member	Canonical Pathways	M8626	SIG BCR SIGNALING PATHWAY	-5.09792	-2.68574	7/46	930,975,3710,5533,11184,23368,29760	CD19,CD81,ITPR3,PPP3CC,MAP4K1,PPP1R13B,BLNK
5_Member	Canonical Pathways	M10	PID BCR 5PATHWAY	-4.18506	-1.89528	7/63	930,973,3265,5533,11184,29760,84433	CD19,CD79A,HRAS,PPP3CC,MAP4K1,BLNK,CARD11
5_Member	GO Biological Processes	GO:0046649	lymphocyte activation	-3.94202	-1.68169	18/407	100,916,930,970,973,975,2841,3615,3662,3932,4063,5450,7163,7374,22806,23513,29760,84433	ADA,CD3E,CD19,CD70,CD79A,CD81,GPR18,IMPDH2,IRF4,LCK,LY9,POU2AF1,TPD52,UNG,IKZF3,SCRIB,BLNK,CARD11
5_Member	KEGG Pathway	hsa04662	B cell receptor signaling pathway	-3.461	-1.26044	7/82	930,973,975,3265,5533,29760,84433	CD19,CD79A,CD81,HRAS,PPP3CC,BLNK,CARD11
5_Member	GO Biological Processes	GO:0042113	B cell activation	-3.4239	-1.2295	10/167	100,930,970,973,5450,7163,7374,22806,29760,84433	ADA,CD19,CD70,CD79A,POU2AF1,TPD52,UNG,IKZF3,BLNK,CARD11
5_Member	GO Biological Processes	GO:0030098	lymphocyte differentiation	-3.06121	-0.960041	12/254	100,916,930,973,2841,3662,3932,4063,5450,7163,29760,84433	ADA,CD3E,CD19,CD79A,GPR18,IRF4,LCK,LY9,POU2AF1,TPD52,BLNK,CARD11
5_Member	Reactome Gene Sets	R-HSA-983695	Antigen activates B Cell Receptor (BCR) leading to generation of second messengers	-2.78852	-0.774277	4/32	930,973,3710,29760	CD19,CD79A,ITPR3,BLNK
5_Member	GO Biological Processes	GO:0045321	leukocyte activation	-2.7478	-0.741558	18/515	100,916,930,970,973,975,2841,3615,3662,3932,4063,5450,7163,7374,22806,23513,29760,84433	ADA,CD3E,CD19,CD70,CD79A,CD81,GPR18,IMPDH2,IRF4,LCK,LY9,POU2AF1,TPD52,UNG,IKZF3,SCRIB,BLNK,CARD11
5_Member	GO Biological Processes	GO:0002521	leukocyte differentiation	-2.72208	-0.725641	14/355	100,142,916,930,973,975,2841,3662,3932,4063,5450,7163,29760,84433	ADA,PARP1,CD3E,CD19,CD79A,CD81,GPR18,IRF4,LCK,LY9,POU2AF1,TPD52,BLNK,CARD11
5_Member	GO Biological Processes	GO:0032943	mononuclear cell proliferation	-2.61229	-0.647618	6/85	930,970,973,1636,3615,84433	CD19,CD70,CD79A,ACE,IMPDH2,CARD11
5_Member	GO Biological Processes	GO:0030183	B cell differentiation	-2.57321	-0.622723	7/116	100,930,973,5450,7163,29760,84433	ADA,CD19,CD79A,POU2AF1,TPD52,BLNK,CARD11
5_Member	GO Biological Processes	GO:1903131	mononuclear cell differentiation	-2.5536	-0.616843	12/292	100,916,930,973,2841,3662,3932,4063,5450,7163,29760,84433	ADA,CD3E,CD19,CD79A,GPR18,IRF4,LCK,LY9,POU2AF1,TPD52,BLNK,CARD11
5_Member	GO Biological Processes	GO:0070661	leukocyte proliferation	-2.32755	-0.469416	6/97	930,970,973,1636,3615,84433	CD19,CD70,CD79A,ACE,IMPDH2,CARD11
5_Member	GO Biological Processes	GO:0042100	B cell proliferation	-2.3129	-0.460373	4/43	930,970,973,84433	CD19,CD70,CD79A,CARD11
5_Member	GO Biological Processes	GO:0002312	B cell activation involved in immune response	-2.04982	-0.283285	4/51	100,930,5450,7374	ADA,CD19,POU2AF1,UNG
5_Member	Reactome Gene Sets	R-HSA-983705	Signaling by the B Cell Receptor (BCR)	-2.02973	-0.27299	6/112	930,973,3265,3710,29760,84433	CD19,CD79A,HRAS,ITPR3,BLNK,CARD11
6_Summary	KEGG Pathway	hsa03410	Base excision repair	-6.11796	-3.57061	7/33	142,3978,4595,5424,5425,7374,10039,4174,4176,2189,3159,4796,322,5437,8607,9656,79068	PARP1,LIG1,MUTYH,POLD1,POLD2,UNG,PARP3,MCM5,MCM7,FANCG,HMGA1,TONSL,APBB1,POLR2H,RUVBL1,MDC1,FTO
6_Member	KEGG Pathway	hsa03410	Base excision repair	-6.11796	-3.57061	7/33	142,3978,4595,5424,5425,7374,10039	PARP1,LIG1,MUTYH,POLD1,POLD2,UNG,PARP3
6_Member	WikiPathways	WP4752	Base excision repair	-5.07109	-2.66392	6/31	142,3978,4595,5424,5425,7374	PARP1,LIG1,MUTYH,POLD1,POLD2,UNG
6_Member	Reactome Gene Sets	R-HSA-73933	Resolution of Abasic Sites (AP sites)	-4.47155	-2.1419	6/39	142,3978,4595,5424,5425,7374	PARP1,LIG1,MUTYH,POLD1,POLD2,UNG
6_Member	Reactome Gene Sets	R-HSA-69190	DNA strand elongation	-3.90896	-1.65569	5/31	3978,4174,4176,5424,5425	LIG1,MCM5,MCM7,POLD1,POLD2
6_Member	KEGG Pathway	hsa03030	DNA replication	-3.59137	-1.36854	5/36	3978,4174,4176,5424,5425	LIG1,MCM5,MCM7,POLD1,POLD2
6_Member	Reactome Gene Sets	R-HSA-110373	Resolution of AP sites via the multiple-nucleotide patch replacement pathway	-3.13687	-1.02318	4/26	142,3978,5424,5425	PARP1,LIG1,POLD1,POLD2
6_Member	CORUM	CORUM:1004	RC complex during S-phase of cell cycle	-2.98683	-0.907316	3/13	142,3978,5424	PARP1,LIG1,POLD1
6_Member	Reactome Gene Sets	R-HSA-5358565	Mismatch repair (MMR) directed by MSH2:MSH6 (MutSalpha)	-2.88726	-0.84377	3/14	3978,5424,5425	LIG1,POLD1,POLD2
6_Member	Reactome Gene Sets	R-HSA-5358606	Mismatch repair (MMR) directed by MSH2:MSH3 (MutSbeta)	-2.88726	-0.84377	3/14	3978,5424,5425	LIG1,POLD1,POLD2
6_Member	CORUM	CORUM:1108	DNA synthesome complex (15 subunits)	-2.79551	-0.779239	3/15	3978,5424,5425	LIG1,POLD1,POLD2
6_Member	GO Biological Processes	GO:0006271	DNA strand elongation involved in DNA replication	-2.79551	-0.779239	3/15	3978,4176,5425	LIG1,MCM7,POLD2
6_Member	Reactome Gene Sets	R-HSA-5358508	Mismatch Repair	-2.79551	-0.779239	3/15	3978,5424,5425	LIG1,POLD1,POLD2
6_Member	Reactome Gene Sets	R-HSA-69183	Processive synthesis on the lagging strand	-2.79551	-0.779239	3/15	3978,5424,5425	LIG1,POLD1,POLD2
6_Member	Reactome Gene Sets	R-HSA-174414	Processive synthesis on the C-strand of the telomere	-2.4878	-0.574078	3/19	3978,5424,5425	LIG1,POLD1,POLD2
6_Member	WikiPathways	WP4946	DNA repair pathways, full network	-2.47093	-0.56041	7/121	142,2189,3978,4595,5424,5425,7374	PARP1,FANCG,LIG1,MUTYH,POLD1,POLD2,UNG
6_Member	Reactome Gene Sets	R-HSA-73884	Base Excision Repair	-2.44043	-0.53465	6/92	142,3978,4595,5424,5425,7374	PARP1,LIG1,MUTYH,POLD1,POLD2,UNG
6_Member	GO Biological Processes	GO:0022616	DNA strand elongation	-2.42236	-0.53052	3/20	3978,4176,5425	LIG1,MCM7,POLD2
6_Member	Reactome Gene Sets	R-HSA-69186	Lagging Strand Synthesis	-2.42236	-0.53052	3/20	3978,5424,5425	LIG1,POLD1,POLD2
6_Member	GO Biological Processes	GO:0006284	base-excision repair	-2.38791	-0.505116	4/41	3978,4595,5424,7374	LIG1,MUTYH,POLD1,UNG
6_Member	Reactome Gene Sets	R-HSA-5651801	PCNA-Dependent Long Patch Base Excision Repair	-2.36055	-0.490986	3/21	3978,5424,5425	LIG1,POLD1,POLD2
6_Member	WikiPathways	WP466	DNA replication	-2.34988	-0.487865	4/42	4174,4176,5424,5425	MCM5,MCM7,POLD1,POLD2
6_Member	GO Biological Processes	GO:0006261	DNA-dependent DNA replication	-2.30022	-0.454591	7/130	3159,3978,4174,4176,4796,5424,5425	HMGA1,LIG1,MCM5,MCM7,TONSL,POLD1,POLD2
6_Member	WikiPathways	WP531	DNA mismatch repair	-2.24644	-0.424801	3/23	3978,5424,5425	LIG1,POLD1,POLD2
6_Member	KEGG Pathway	hsa03430	Mismatch repair	-2.24644	-0.424801	3/23	3978,5424,5425	LIG1,POLD1,POLD2
6_Member	Reactome Gene Sets	R-HSA-5696397	Gap-filling DNA repair synthesis and ligation in GG-NER	-2.14317	-0.359058	3/25	3978,5424,5425	LIG1,POLD1,POLD2
6_Member	Reactome Gene Sets	R-HSA-73894	DNA Repair	-2.08826	-0.312115	12/335	142,322,2189,3978,4595,5424,5425,5437,7374,8607,9656,79068	PARP1,APBB1,FANCG,LIG1,MUTYH,POLD1,POLD2,POLR2H,UNG,RUVBL1,MDC1,FTO
6_Member	Reactome Gene Sets	R-HSA-180786	Extension of Telomeres	-2.04982	-0.283285	4/51	3978,5424,5425,8607	LIG1,POLD1,POLD2,RUVBL1
6_Member	Reactome Gene Sets	R-HSA-5696398	Nucleotide Excision Repair	-2.04791	-0.283285	6/111	142,3978,5424,5425,5437,8607	PARP1,LIG1,POLD1,POLD2,POLR2H,RUVBL1
7_Summary	GO Biological Processes	GO:0030888	regulation of B cell proliferation	-6.09671	-3.55621	9/64	100,975,22806,23495,51237,51293,84433,115352,115650,3783,3932,930,29085,916,970,1725,23513,939,8631,9780,25930,2648,3662	ADA,CD81,IKZF3,TNFRSF13B,MZB1,CD320,CARD11,FCRL3,TNFRSF13C,KCNN4,LCK,CD19,PHPT1,CD3E,CD70,DHPS,SCRIB,CD27,SKAP1,PIEZO1,PTPN23,KAT2A,IRF4
7_Member	GO Biological Processes	GO:0030888	regulation of B cell proliferation	-6.09671	-3.55621	9/64	100,975,22806,23495,51237,51293,84433,115352,115650	ADA,CD81,IKZF3,TNFRSF13B,MZB1,CD320,CARD11,FCRL3,TNFRSF13C
7_Member	GO Biological Processes	GO:0050862	positive regulation of T cell receptor signaling pathway	-5.41299	-2.96393	5/16	100,975,3783,3932,84433	ADA,CD81,KCNN4,LCK,CARD11
7_Member	GO Biological Processes	GO:0050854	regulation of antigen receptor-mediated signaling pathway	-4.9885	-2.5912	8/66	100,930,975,3783,3932,29085,84433,115352	ADA,CD19,CD81,KCNN4,LCK,PHPT1,CARD11,FCRL3
7_Member	GO Biological Processes	GO:0050857	positive regulation of antigen receptor-mediated signaling pathway	-4.2925	-1.97924	5/26	100,975,3783,3932,84433	ADA,CD81,KCNN4,LCK,CARD11
7_Member	GO Biological Processes	GO:0030890	positive regulation of B cell proliferation	-4.2829	-1.97761	6/42	100,975,51293,84433,115352,115650	ADA,CD81,CD320,CARD11,FCRL3,TNFRSF13C
7_Member	GO Biological Processes	GO:0031294	lymphocyte costimulation	-4.22349	-1.92213	6/43	916,975,3932,51293,84433,115650	CD3E,CD81,LCK,CD320,CARD11,TNFRSF13C
7_Member	GO Biological Processes	GO:0050856	regulation of T cell receptor signaling pathway	-4.16568	-1.8797	6/44	100,975,3783,3932,29085,84433	ADA,CD81,KCNN4,LCK,PHPT1,CARD11
7_Member	GO Biological Processes	GO:0050670	regulation of lymphocyte proliferation	-4.02595	-1.74745	13/230	100,916,970,975,1725,22806,23495,23513,51237,51293,84433,115352,115650	ADA,CD3E,CD70,CD81,DHPS,IKZF3,TNFRSF13B,SCRIB,MZB1,CD320,CARD11,FCRL3,TNFRSF13C
7_Member	GO Biological Processes	GO:0032944	regulation of mononuclear cell proliferation	-3.96953	-1.70552	13/233	100,916,970,975,1725,22806,23495,23513,51237,51293,84433,115352,115650	ADA,CD3E,CD70,CD81,DHPS,IKZF3,TNFRSF13B,SCRIB,MZB1,CD320,CARD11,FCRL3,TNFRSF13C
7_Member	GO Biological Processes	GO:0070663	regulation of leukocyte proliferation	-3.60068	-1.36854	13/254	100,916,970,975,1725,22806,23495,23513,51237,51293,84433,115352,115650	ADA,CD3E,CD70,CD81,DHPS,IKZF3,TNFRSF13B,SCRIB,MZB1,CD320,CARD11,FCRL3,TNFRSF13C
7_Member	GO Biological Processes	GO:0050671	positive regulation of lymphocyte proliferation	-3.33648	-1.1551	9/141	100,916,970,975,1725,51293,84433,115352,115650	ADA,CD3E,CD70,CD81,DHPS,CD320,CARD11,FCRL3,TNFRSF13C
7_Member	GO Biological Processes	GO:0031295	T cell costimulation	-3.32146	-1.14796	5/41	916,975,3932,84433,115650	CD3E,CD81,LCK,CARD11,TNFRSF13C
7_Member	GO Biological Processes	GO:0032946	positive regulation of mononuclear cell proliferation	-3.29194	-1.12135	9/143	100,916,970,975,1725,51293,84433,115352,115650	ADA,CD3E,CD70,CD81,DHPS,CD320,CARD11,FCRL3,TNFRSF13C
7_Member	GO Biological Processes	GO:0070665	positive regulation of leukocyte proliferation	-2.98208	-0.904912	9/158	100,916,970,975,1725,51293,84433,115352,115650	ADA,CD3E,CD70,CD81,DHPS,CD320,CARD11,FCRL3,TNFRSF13C
7_Member	GO Biological Processes	GO:0022409	positive regulation of cell-cell adhesion	-2.56567	-0.618845	12/291	100,916,939,970,975,1725,3932,8631,9780,25930,84433,115650	ADA,CD3E,CD27,CD70,CD81,DHPS,LCK,SKAP1,PIEZO1,PTPN23,CARD11,TNFRSF13C
7_Member	GO Biological Processes	GO:0042102	positive regulation of T cell proliferation	-2.20162	-0.395891	6/103	916,970,975,1725,84433,115650	CD3E,CD70,CD81,DHPS,CARD11,TNFRSF13C
7_Member	GO Biological Processes	GO:1903039	positive regulation of leukocyte cell-cell adhesion	-2.19518	-0.395891	10/245	100,916,939,970,975,1725,3932,8631,84433,115650	ADA,CD3E,CD27,CD70,CD81,DHPS,LCK,SKAP1,CARD11,TNFRSF13C
7_Member	GO Biological Processes	GO:0050863	regulation of T cell activation	-2.02144	-0.268042	12/342	100,916,939,970,975,1725,2648,3662,3932,23513,84433,115650	ADA,CD3E,CD27,CD70,CD81,DHPS,KAT2A,IRF4,LCK,SCRIB,CARD11,TNFRSF13C
8_Summary	GO Biological Processes	GO:0106074	aminoacyl-tRNA metabolism involved in translational fidelity	-5.92645	-3.39931	5/13	16,7407,57176,57505,80755,8565,10667,55621,81890,348180	AARS1,VARS1,VARS2,AARS2,AARSD1,YARS1,FARS2,TRMT1,QTRT1,CTU2
8_Member	GO Biological Processes	GO:0106074	aminoacyl-tRNA metabolism involved in translational fidelity	-5.92645	-3.39931	5/13	16,7407,57176,57505,80755	AARS1,VARS1,VARS2,AARS2,AARSD1
8_Member	GO Biological Processes	GO:0006418	tRNA aminoacylation for protein translation	-5.44471	-2.99012	7/41	16,7407,8565,10667,57176,57505,80755	AARS1,VARS1,YARS1,FARS2,VARS2,AARS2,AARSD1
8_Member	GO Biological Processes	GO:0006419	alanyl-tRNA aminoacylation	-5.39131	-2.95311	3/3	16,57505,80755	AARS1,AARS2,AARSD1
8_Member	GO Biological Processes	GO:0043039	tRNA aminoacylation	-5.23108	-2.80347	7/44	16,7407,8565,10667,57176,57505,80755	AARS1,VARS1,YARS1,FARS2,VARS2,AARS2,AARSD1
8_Member	GO Biological Processes	GO:0043038	amino acid activation	-5.16363	-2.74637	7/45	16,7407,8565,10667,57176,57505,80755	AARS1,VARS1,YARS1,FARS2,VARS2,AARS2,AARSD1
8_Member	GO Biological Processes	GO:0006450	regulation of translational fidelity	-4.77342	-2.41381	5/21	16,7407,57176,57505,80755	AARS1,VARS1,VARS2,AARS2,AARSD1
8_Member	Reactome Gene Sets	R-HSA-379724	tRNA Aminoacylation	-4.2829	-1.97761	6/42	16,7407,8565,10667,57176,57505	AARS1,VARS1,YARS1,FARS2,VARS2,AARS2
8_Member	GO Biological Processes	GO:0006399	tRNA metabolic process	-3.22559	-1.06643	10/177	16,7407,8565,10667,55621,57176,57505,80755,81890,348180	AARS1,VARS1,YARS1,FARS2,TRMT1,VARS2,AARS2,AARSD1,QTRT1,CTU2
8_Member	KEGG Pathway	hsa00970	Aminoacyl-tRNA biosynthesis	-3.18452	-1.05343	6/66	16,7407,8565,10667,57176,57505	AARS1,VARS1,YARS1,FARS2,VARS2,AARS2
8_Member	Reactome Gene Sets	R-HSA-379726	Mitochondrial tRNA aminoacylation	-2.36055	-0.490986	3/21	10667,57176,57505	FARS2,VARS2,AARS2
8_Member	Reactome Gene Sets	R-HSA-379716	Cytosolic tRNA aminoacylation	-2.19357	-0.395891	3/24	16,7407,8565	AARS1,VARS1,YARS1
9_Summary	GO Biological Processes	GO:0006259	DNA metabolic process	-5.86197	-3.34136	30/703	142,2189,3297,3326,3835,3978,4174,4176,4221,4595,4796,5424,5425,6749,7374,8607,9361,9656,10039,10155,10919,51149,54984,56893,79068,79703,84939,140564,200316,286257,322,3661,55367,79791,84303,54929,25792,25849	PARP1,FANCG,HSF1,HSP90AB1,KIF22,LIG1,MCM5,MCM7,MEN1,MUTYH,TONSL,POLD1,POLD2,SSRP1,UNG,RUVBL1,LONP1,MDC1,PARP3,TRIM28,EHMT2,MRNIP,PINX1,UBQLN4,FTO,C11orf80,PWWP3A,APOBEC3D,APOBEC3F,PAXX,APBB1,IRF3,PIDD1,FBXO31,CHCHD6,TMEM161A,CIZ1,PARM1
9_Member	GO Biological Processes	GO:0006259	DNA metabolic process	-5.86197	-3.34136	30/703	142,2189,3297,3326,3835,3978,4174,4176,4221,4595,4796,5424,5425,6749,7374,8607,9361,9656,10039,10155,10919,51149,54984,56893,79068,79703,84939,140564,200316,286257	PARP1,FANCG,HSF1,HSP90AB1,KIF22,LIG1,MCM5,MCM7,MEN1,MUTYH,TONSL,POLD1,POLD2,SSRP1,UNG,RUVBL1,LONP1,MDC1,PARP3,TRIM28,EHMT2,MRNIP,PINX1,UBQLN4,FTO,C11orf80,PWWP3A,APOBEC3D,APOBEC3F,PAXX
9_Member	GO Biological Processes	GO:0006281	DNA repair	-5.60375	-3.13788	23/469	142,2189,3297,3835,3978,4174,4176,4221,4595,4796,5424,5425,6749,7374,8607,9656,10039,10155,51149,56893,79068,84939,286257	PARP1,FANCG,HSF1,KIF22,LIG1,MCM5,MCM7,MEN1,MUTYH,TONSL,POLD1,POLD2,SSRP1,UNG,RUVBL1,MDC1,PARP3,TRIM28,MRNIP,UBQLN4,FTO,PWWP3A,PAXX
9_Member	GO Biological Processes	GO:0006974	cellular response to DNA damage stimulus	-4.88573	-2.51257	28/709	142,322,2189,3297,3661,3835,3978,4174,4176,4221,4595,4796,5424,5425,6749,7374,8607,9656,10039,10155,51149,55367,56893,79068,79791,84303,84939,286257	PARP1,APBB1,FANCG,HSF1,IRF3,KIF22,LIG1,MCM5,MCM7,MEN1,MUTYH,TONSL,POLD1,POLD2,SSRP1,UNG,RUVBL1,MDC1,PARP3,TRIM28,MRNIP,PIDD1,UBQLN4,FTO,FBXO31,CHCHD6,PWWP3A,PAXX
9_Member	GO Biological Processes	GO:0006282	regulation of DNA repair	-2.49644	-0.575266	8/152	142,3297,8607,10039,10155,51149,54929,56893	PARP1,HSF1,RUVBL1,PARP3,TRIM28,MRNIP,TMEM161A,UBQLN4
9_Member	GO Biological Processes	GO:0051053	negative regulation of DNA metabolic process	-2.43157	-0.53052	7/123	142,3297,4221,10039,10155,54984,56893	PARP1,HSF1,MEN1,PARP3,TRIM28,PINX1,UBQLN4
9_Member	GO Biological Processes	GO:0045739	positive regulation of DNA repair	-2.39435	-0.508566	6/94	142,8607,10039,10155,51149,54929	PARP1,RUVBL1,PARP3,TRIM28,MRNIP,TMEM161A
9_Member	GO Biological Processes	GO:0051054	positive regulation of DNA metabolic process	-2.37101	-0.494143	10/231	142,3297,3326,8607,10039,10155,25792,25849,51149,54929	PARP1,HSF1,HSP90AB1,RUVBL1,PARP3,TRIM28,CIZ1,PARM1,MRNIP,TMEM161A
9_Member	GO Biological Processes	GO:0051052	regulation of DNA metabolic process	-2.22568	-0.411595	14/404	142,3297,3326,4221,8607,10039,10155,10919,25792,25849,51149,54929,54984,56893	PARP1,HSF1,HSP90AB1,MEN1,RUVBL1,PARP3,TRIM28,EHMT2,CIZ1,PARM1,MRNIP,TMEM161A,PINX1,UBQLN4
9_Member	GO Biological Processes	GO:2000779	regulation of double-strand break repair	-2.06631	-0.29481	6/110	142,3297,8607,10039,51149,56893	PARP1,HSF1,RUVBL1,PARP3,MRNIP,UBQLN4
10_Summary	GO Biological Processes	GO:0006520	cellular amino acid metabolic process	-4.95502	-2.56258	16/276	16,790,2805,2806,4522,5832,6472,7407,8565,8985,10667,51078,57176,57505,57571,80755,100,231,2026,2686,9524,9677,11332,54963,84532,93058,114881,142,3159,6723,471	AARS1,CAD,GOT1,GOT2,MTHFD1,ALDH18A1,SHMT2,VARS1,YARS1,PLOD3,FARS2,THAP4,VARS2,AARS2,CARNS1,AARSD1,ADA,AKR1B1,ENO2,GGT7,TECR,PPIP5K1,ACOT7,UCKL1,ACSS1,COQ10A,OSBPL7,PARP1,HMGA1,SRM,ATIC
10_Member	GO Biological Processes	GO:0006520	cellular amino acid metabolic process	-4.95502	-2.56258	16/276	16,790,2805,2806,4522,5832,6472,7407,8565,8985,10667,51078,57176,57505,57571,80755	AARS1,CAD,GOT1,GOT2,MTHFD1,ALDH18A1,SHMT2,VARS1,YARS1,PLOD3,FARS2,THAP4,VARS2,AARS2,CARNS1,AARSD1
10_Member	GO Biological Processes	GO:0044283	small molecule biosynthetic process	-4.21732	-1.91986	19/423	100,231,790,2026,2686,2805,2806,4522,5832,6472,8985,9524,9677,11332,54963,57571,84532,93058,114881	ADA,AKR1B1,CAD,ENO2,GGT7,GOT1,GOT2,MTHFD1,ALDH18A1,SHMT2,PLOD3,TECR,PPIP5K1,ACOT7,UCKL1,CARNS1,ACSS1,COQ10A,OSBPL7
10_Member	GO Biological Processes	GO:1901607	alpha-amino acid biosynthetic process	-4.01248	-1.73768	7/67	790,2805,2806,4522,5832,6472,8985	CAD,GOT1,GOT2,MTHFD1,ALDH18A1,SHMT2,PLOD3
10_Member	GO Biological Processes	GO:0008652	cellular amino acid biosynthetic process	-3.81334	-1.56703	7/72	790,2805,2806,4522,5832,6472,8985	CAD,GOT1,GOT2,MTHFD1,ALDH18A1,SHMT2,PLOD3
10_Member	GO Biological Processes	GO:0009067	aspartate family amino acid biosynthetic process	-3.507	-1.29065	4/21	2805,2806,4522,8985	GOT1,GOT2,MTHFD1,PLOD3
10_Member	GO Biological Processes	GO:0046394	carboxylic acid biosynthetic process	-3.50302	-1.28987	13/260	790,2686,2805,2806,4522,5832,6472,8985,9524,11332,57571,84532,114881	CAD,GGT7,GOT1,GOT2,MTHFD1,ALDH18A1,SHMT2,PLOD3,TECR,ACOT7,CARNS1,ACSS1,OSBPL7
10_Member	GO Biological Processes	GO:0016053	organic acid biosynthetic process	-3.47117	-1.2675	13/262	790,2686,2805,2806,4522,5832,6472,8985,9524,11332,57571,84532,114881	CAD,GGT7,GOT1,GOT2,MTHFD1,ALDH18A1,SHMT2,PLOD3,TECR,ACOT7,CARNS1,ACSS1,OSBPL7
10_Member	WikiPathways	WP5046	NAD metabolism in oncogene-induced senescence and mitochondrial dysfunction-associated senescence	-3.27417	-1.10933	4/24	142,2805,2806,3159	PARP1,GOT1,GOT2,HMGA1
10_Member	WikiPathways	WP3925	Amino acid metabolism	-3.18616	-1.05343	7/91	790,2805,2806,5832,6723,7407,84532	CAD,GOT1,GOT2,ALDH18A1,SRM,VARS1,ACSS1
10_Member	GO Biological Processes	GO:0043650	dicarboxylic acid biosynthetic process	-2.98683	-0.907316	3/13	2805,2806,4522	GOT1,GOT2,MTHFD1
10_Member	KEGG Pathway	hsa00330	Arginine and proline metabolism	-2.88205	-0.840718	5/51	2805,2806,5832,6723,57571	GOT1,GOT2,ALDH18A1,SRM,CARNS1
10_Member	GO Biological Processes	GO:0043648	dicarboxylic acid metabolic process	-2.46394	-0.55501	6/91	471,2805,2806,4522,5832,6472	ATIC,GOT1,GOT2,MTHFD1,ALDH18A1,SHMT2
10_Member	GO Biological Processes	GO:0009066	aspartate family amino acid metabolic process	-2.11069	-0.331031	4/49	2805,2806,4522,8985	GOT1,GOT2,MTHFD1,PLOD3
11_Summary	GO Biological Processes	GO:0009451	RNA modification	-4.79431	-2.42989	12/166	16,2091,4839,55621,57505,79068,81890,114049,140564,155400,200316,348180,3276,4221,10155,10919,28989	AARS1,FBL,NOP2,TRMT1,AARS2,FTO,QTRT1,BUD23,APOBEC3D,NSUN5P1,APOBEC3F,CTU2,PRMT1,MEN1,TRIM28,EHMT2,NTMT1
11_Member	GO Biological Processes	GO:0009451	RNA modification	-4.79431	-2.42989	12/166	16,2091,4839,55621,57505,79068,81890,114049,140564,155400,200316,348180	AARS1,FBL,NOP2,TRMT1,AARS2,FTO,QTRT1,BUD23,APOBEC3D,NSUN5P1,APOBEC3F,CTU2
11_Member	GO Biological Processes	GO:0070475	rRNA base methylation	-3.21537	-1.06551	3/11	4839,114049,155400	NOP2,BUD23,NSUN5P1
11_Member	GO Biological Processes	GO:0031167	rRNA methylation	-3.13687	-1.02318	4/26	2091,4839,114049,155400	FBL,NOP2,BUD23,NSUN5P1
11_Member	GO Biological Processes	GO:0000154	rRNA modification	-2.55178	-0.616717	4/37	2091,4839,114049,155400	FBL,NOP2,BUD23,NSUN5P1
11_Member	GO Biological Processes	GO:0043414	macromolecule methylation	-2.04496	-0.281471	10/258	2091,3276,4221,4839,10155,10919,28989,55621,114049,155400	FBL,PRMT1,MEN1,NOP2,TRIM28,EHMT2,NTMT1,TRMT1,BUD23,NSUN5P1
12_Summary	GO Biological Processes	GO:0006304	DNA modification	-4.76926	-2.41381	9/92	142,4595,7374,10039,10155,10919,79068,140564,200316,100,2592,231,471,54963	PARP1,MUTYH,UNG,PARP3,TRIM28,EHMT2,FTO,APOBEC3D,APOBEC3F,ADA,GALT,AKR1B1,ATIC,UCKL1
12_Member	GO Biological Processes	GO:0006304	DNA modification	-4.76926	-2.41381	9/92	142,4595,7374,10039,10155,10919,79068,140564,200316	PARP1,MUTYH,UNG,PARP3,TRIM28,EHMT2,FTO,APOBEC3D,APOBEC3F
12_Member	GO Biological Processes	GO:0034656	nucleobase-containing small molecule catabolic process	-2.95226	-0.877776	4/29	100,2592,140564,200316	ADA,GALT,APOBEC3D,APOBEC3F
12_Member	GO Biological Processes	GO:0045869	negative regulation of single stranded viral RNA replication via double stranded DNA intermediate	-2.71049	-0.723641	3/16	10155,140564,200316	TRIM28,APOBEC3D,APOBEC3F
12_Member	GO Biological Processes	GO:1901657	glycosyl compound metabolic process	-2.51198	-0.586901	6/89	100,231,471,54963,140564,200316	ADA,AKR1B1,ATIC,UCKL1,APOBEC3D,APOBEC3F
12_Member	GO Biological Processes	GO:0045091	regulation of single stranded viral RNA replication via double stranded DNA intermediate	-2.4878	-0.574078	3/19	10155,140564,200316	TRIM28,APOBEC3D,APOBEC3F
12_Member	GO Biological Processes	GO:0009116	nucleoside metabolic process	-2.47388	-0.56176	5/63	100,471,54963,140564,200316	ADA,ATIC,UCKL1,APOBEC3D,APOBEC3F
12_Member	GO Biological Processes	GO:0042454	ribonucleoside catabolic process	-2.42236	-0.53052	3/20	100,140564,200316	ADA,APOBEC3D,APOBEC3F
12_Member	GO Biological Processes	GO:0080111	DNA demethylation	-2.42236	-0.53052	3/20	79068,140564,200316	FTO,APOBEC3D,APOBEC3F
12_Member	GO Biological Processes	GO:0044728	DNA methylation or demethylation	-2.27726	-0.442137	5/70	10155,10919,79068,140564,200316	TRIM28,EHMT2,FTO,APOBEC3D,APOBEC3F
12_Member	GO Biological Processes	GO:0035510	DNA dealkylation	-2.24644	-0.424801	3/23	79068,140564,200316	FTO,APOBEC3D,APOBEC3F
12_Member	GO Biological Processes	GO:0006213	pyrimidine nucleoside metabolic process	-2.19357	-0.395891	3/24	54963,140564,200316	UCKL1,APOBEC3D,APOBEC3F
12_Member	GO Biological Processes	GO:0009164	nucleoside catabolic process	-2.14317	-0.359058	3/25	100,140564,200316	ADA,APOBEC3D,APOBEC3F
13_Summary	GO Biological Processes	GO:0033632	regulation of cell-cell adhesion mediated by integrin	-4.71043	-2.35938	4/11	100,916,8631,9780	ADA,CD3E,SKAP1,PIEZO1
13_Member	GO Biological Processes	GO:0033632	regulation of cell-cell adhesion mediated by integrin	-4.71043	-2.35938	4/11	100,916,8631,9780	ADA,CD3E,SKAP1,PIEZO1
13_Member	GO Biological Processes	GO:0033634	positive regulation of cell-cell adhesion mediated by integrin	-4.10589	-1.82366	3/6	916,8631,9780	CD3E,SKAP1,PIEZO1
13_Member	GO Biological Processes	GO:0033630	positive regulation of cell adhesion mediated by integrin	-2.36055	-0.490986	3/21	916,8631,9780	CD3E,SKAP1,PIEZO1
13_Member	GO Biological Processes	GO:0033628	regulation of cell adhesion mediated by integrin	-2.14226	-0.359058	4/48	100,916,8631,9780	ADA,CD3E,SKAP1,PIEZO1
14_Summary	WikiPathways	WP69	T-cell receptor (TCR) signaling pathway	-3.96942	-1.70552	8/91	916,3265,3662,3932,5335,8631,11184,84433,7186,51466,5533,4063,29760,3326	CD3E,HRAS,IRF4,LCK,PLCG1,SKAP1,MAP4K1,CARD11,TRAF2,EVL,PPP3CC,LY9,BLNK,HSP90AB1
14_Member	WikiPathways	WP69	T-cell receptor (TCR) signaling pathway	-3.96942	-1.70552	8/91	916,3265,3662,3932,5335,8631,11184,84433	CD3E,HRAS,IRF4,LCK,PLCG1,SKAP1,MAP4K1,CARD11
14_Member	Canonical Pathways	M34	PID TCR PATHWAY	-3.25633	-1.09434	6/64	916,3265,3932,5335,11184,84433	CD3E,HRAS,LCK,PLCG1,MAP4K1,CARD11
14_Member	Canonical Pathways	M88	PID CD8 TCR PATHWAY	-2.80644	-0.779508	5/53	916,3265,3932,5335,84433	CD3E,HRAS,LCK,PLCG1,CARD11
14_Member	GO Biological Processes	GO:0032743	positive regulation of interleukin-2 production	-2.68897	-0.713353	4/34	916,3662,7186,84433	CD3E,IRF4,TRAF2,CARD11
14_Member	Reactome Gene Sets	R-HSA-202433	Generation of second messenger molecules	-2.68897	-0.713353	4/34	916,3932,5335,51466	CD3E,LCK,PLCG1,EVL
14_Member	WikiPathways	WP5098	T-cell activation SARS-CoV-2	-2.56141	-0.618845	6/87	916,3265,3932,5335,5533,84433	CD3E,HRAS,LCK,PLCG1,PPP3CC,CARD11
14_Member	WikiPathways	WP5072	Modulators of TCR signaling and T cell activation	-2.53503	-0.603315	5/61	916,3932,5335,11184,84433	CD3E,LCK,PLCG1,MAP4K1,CARD11
14_Member	GO Biological Processes	GO:0045058	T cell selection	-2.34988	-0.487865	4/42	916,3662,4063,84433	CD3E,IRF4,LY9,CARD11
14_Member	KEGG Pathway	hsa04660	T cell receptor signaling pathway	-2.18156	-0.387545	6/104	916,3265,3932,5335,5533,84433	CD3E,HRAS,LCK,PLCG1,PPP3CC,CARD11
14_Member	Canonical Pathways	M141	PID PI3KCI PATHWAY	-2.14226	-0.359058	4/48	3265,3932,5335,29760	HRAS,LCK,PLCG1,BLNK
14_Member	KEGG Pathway	hsa04659	Th17 cell differentiation	-2.10378	-0.326473	6/108	916,3326,3662,3932,5335,5533	CD3E,HSP90AB1,IRF4,LCK,PLCG1,PPP3CC
15_Summary	GO Biological Processes	GO:0055086	nucleobase-containing small molecule metabolic process	-3.92618	-1.6694	20/483	100,471,790,1798,2026,2592,3615,4522,5214,6472,7374,9524,11332,54963,80221,84433,84532,84836,140564,200316	ADA,ATIC,CAD,DPAGT1,ENO2,GALT,IMPDH2,MTHFD1,PFKP,SHMT2,UNG,TECR,ACOT7,UCKL1,ACSF2,CARD11,ACSS1,ABHD14B,APOBEC3D,APOBEC3F
15_Member	GO Biological Processes	GO:0055086	nucleobase-containing small molecule metabolic process	-3.92618	-1.6694	20/483	100,471,790,1798,2026,2592,3615,4522,5214,6472,7374,9524,11332,54963,80221,84433,84532,84836,140564,200316	ADA,ATIC,CAD,DPAGT1,ENO2,GALT,IMPDH2,MTHFD1,PFKP,SHMT2,UNG,TECR,ACOT7,UCKL1,ACSF2,CARD11,ACSS1,ABHD14B,APOBEC3D,APOBEC3F
15_Member	GO Biological Processes	GO:0009156	ribonucleoside monophosphate biosynthetic process	-3.71186	-1.47576	5/34	100,471,790,3615,54963	ADA,ATIC,CAD,IMPDH2,UCKL1
15_Member	GO Biological Processes	GO:0009161	ribonucleoside monophosphate metabolic process	-3.44834	-1.25087	6/59	100,471,790,3615,54963,84433	ADA,ATIC,CAD,IMPDH2,UCKL1,CARD11
15_Member	GO Biological Processes	GO:0009124	nucleoside monophosphate biosynthetic process	-3.1774	-1.05343	5/44	100,471,790,3615,54963	ADA,ATIC,CAD,IMPDH2,UCKL1
15_Member	GO Biological Processes	GO:0046037	GMP metabolic process	-3.13687	-1.02318	4/26	100,471,3615,84433	ADA,ATIC,IMPDH2,CARD11
15_Member	GO Biological Processes	GO:0006177	GMP biosynthetic process	-2.88726	-0.84377	3/14	100,471,3615	ADA,ATIC,IMPDH2
15_Member	Reactome Gene Sets	R-HSA-8956320	Nucleotide biosynthesis	-2.88726	-0.84377	3/14	471,790,3615	ATIC,CAD,IMPDH2
15_Member	GO Biological Processes	GO:0009123	nucleoside monophosphate metabolic process	-2.8029	-0.779239	6/78	100,471,790,3615,54963,84433	ADA,ATIC,CAD,IMPDH2,UCKL1,CARD11
15_Member	GO Biological Processes	GO:0009259	ribonucleotide metabolic process	-2.67769	-0.705751	13/320	100,471,790,2026,3615,5214,9524,11332,54963,80221,84433,84532,84836	ADA,ATIC,CAD,ENO2,IMPDH2,PFKP,TECR,ACOT7,UCKL1,ACSF2,CARD11,ACSS1,ABHD14B
15_Member	GO Biological Processes	GO:0009117	nucleotide metabolic process	-2.58405	-0.630057	15/408	100,471,790,2026,3615,4522,5214,7374,9524,11332,54963,80221,84433,84532,84836	ADA,ATIC,CAD,ENO2,IMPDH2,MTHFD1,PFKP,UNG,TECR,ACOT7,UCKL1,ACSF2,CARD11,ACSS1,ABHD14B
15_Member	GO Biological Processes	GO:0019693	ribose phosphate metabolic process	-2.56246	-0.618845	13/330	100,471,790,2026,3615,5214,9524,11332,54963,80221,84433,84532,84836	ADA,ATIC,CAD,ENO2,IMPDH2,PFKP,TECR,ACOT7,UCKL1,ACSF2,CARD11,ACSS1,ABHD14B
15_Member	GO Biological Processes	GO:0072521	purine-containing compound metabolic process	-2.49589	-0.575266	13/336	100,471,2026,3615,4522,5214,6472,9524,11332,80221,84433,84532,84836	ADA,ATIC,ENO2,IMPDH2,MTHFD1,PFKP,SHMT2,TECR,ACOT7,ACSF2,CARD11,ACSS1,ABHD14B
15_Member	GO Biological Processes	GO:0006753	nucleoside phosphate metabolic process	-2.49544	-0.575266	15/417	100,471,790,2026,3615,4522,5214,7374,9524,11332,54963,80221,84433,84532,84836	ADA,ATIC,CAD,ENO2,IMPDH2,MTHFD1,PFKP,UNG,TECR,ACOT7,UCKL1,ACSF2,CARD11,ACSS1,ABHD14B
15_Member	GO Biological Processes	GO:0009168	purine ribonucleoside monophosphate biosynthetic process	-2.42236	-0.53052	3/20	100,471,3615	ADA,ATIC,IMPDH2
15_Member	GO Biological Processes	GO:0009260	ribonucleotide biosynthetic process	-2.39449	-0.508566	8/158	100,471,790,3615,9524,11332,54963,84532	ADA,ATIC,CAD,IMPDH2,TECR,ACOT7,UCKL1,ACSS1
15_Member	GO Biological Processes	GO:0009167	purine ribonucleoside monophosphate metabolic process	-2.34988	-0.487865	4/42	100,471,3615,84433	ADA,ATIC,IMPDH2,CARD11
15_Member	GO Biological Processes	GO:0072522	purine-containing compound biosynthetic process	-2.34549	-0.48594	8/161	100,471,3615,4522,6472,9524,11332,84532	ADA,ATIC,IMPDH2,MTHFD1,SHMT2,TECR,ACOT7,ACSS1
15_Member	GO Biological Processes	GO:0009127	purine nucleoside monophosphate biosynthetic process	-2.30201	-0.455014	3/22	100,471,3615	ADA,ATIC,IMPDH2
15_Member	GO Biological Processes	GO:0006163	purine nucleotide metabolic process	-2.29225	-0.447995	12/315	100,471,2026,3615,4522,5214,9524,11332,80221,84433,84532,84836	ADA,ATIC,ENO2,IMPDH2,MTHFD1,PFKP,TECR,ACOT7,ACSF2,CARD11,ACSS1,ABHD14B
15_Member	GO Biological Processes	GO:0046390	ribose phosphate biosynthetic process	-2.28209	-0.442137	8/165	100,471,790,3615,9524,11332,54963,84532	ADA,ATIC,CAD,IMPDH2,TECR,ACOT7,UCKL1,ACSS1
15_Member	GO Biological Processes	GO:0009126	purine nucleoside monophosphate metabolic process	-2.27694	-0.442137	4/44	100,471,3615,84433	ADA,ATIC,IMPDH2,CARD11
15_Member	GO Biological Processes	GO:0009165	nucleotide biosynthetic process	-2.10637	-0.327889	9/214	100,471,790,3615,4522,9524,11332,54963,84532	ADA,ATIC,CAD,IMPDH2,MTHFD1,TECR,ACOT7,UCKL1,ACSS1
15_Member	GO Biological Processes	GO:1901293	nucleoside phosphate biosynthetic process	-2.08128	-0.306301	9/216	100,471,790,3615,4522,9524,11332,54963,84532	ADA,ATIC,CAD,IMPDH2,MTHFD1,TECR,ACOT7,UCKL1,ACSS1
15_Member	GO Biological Processes	GO:0009150	purine ribonucleotide metabolic process	-2.00689	-0.258086	11/302	100,471,2026,3615,5214,9524,11332,80221,84433,84532,84836	ADA,ATIC,ENO2,IMPDH2,PFKP,TECR,ACOT7,ACSF2,CARD11,ACSS1,ABHD14B
16_Summary	GO Biological Processes	GO:0097205	renal filtration	-3.88547	-1.6357	4/17	3493,3494,3675,28912,6223,231,4302,7466,3502,3514,9696	IGHA1,IGHA2,ITGA3,IGKV3-20,RPS19,AKR1B1,MLLT6,WFS1,IGHG3,IGKC,CROCC
16_Member	GO Biological Processes	GO:0097205	renal filtration	-3.88547	-1.6357	4/17	3493,3494,3675,28912	IGHA1,IGHA2,ITGA3,IGKV3-20
16_Member	GO Biological Processes	GO:0060267	positive regulation of respiratory burst	-3.49821	-1.28825	3/9	3493,3494,6223	IGHA1,IGHA2,RPS19
16_Member	GO Biological Processes	GO:0003014	renal system process	-2.89296	-0.84377	7/102	231,3493,3494,3675,4302,7466,28912	AKR1B1,IGHA1,IGHA2,ITGA3,MLLT6,WFS1,IGKV3-20
16_Member	GO Biological Processes	GO:0003094	glomerular filtration	-2.71049	-0.723641	3/16	3493,3494,28912	IGHA1,IGHA2,IGKV3-20
16_Member	GO Biological Processes	GO:0060263	regulation of respiratory burst	-2.55729	-0.618845	3/18	3493,3494,6223	IGHA1,IGHA2,RPS19
16_Member	GO Biological Processes	GO:0001895	retina homeostasis	-2.03529	-0.274893	5/80	3493,3494,3502,3514,9696	IGHA1,IGHA2,IGHG3,IGKC,CROCC
17_Summary	Reactome Gene Sets	R-HSA-162587	HIV Life Cycle	-3.75281	-1.50993	10/152	3159,3978,5437,5905,6749,6829,7469,8086,23225,23511,3932,9656	HMGA1,LIG1,POLR2H,RANGAP1,SSRP1,SUPT5H,NELFA,AAAS,NUP210,NUP188,LCK,MDC1
17_Member	Reactome Gene Sets	R-HSA-162587	HIV Life Cycle	-3.75281	-1.50993	10/152	3159,3978,5437,5905,6749,6829,7469,8086,23225,23511	HMGA1,LIG1,POLR2H,RANGAP1,SSRP1,SUPT5H,NELFA,AAAS,NUP210,NUP188
17_Member	Reactome Gene Sets	R-HSA-162906	HIV Infection	-2.83453	-0.801716	11/234	3159,3932,3978,5437,5905,6749,6829,7469,8086,23225,23511	HMGA1,LCK,LIG1,POLR2H,RANGAP1,SSRP1,SUPT5H,NELFA,AAAS,NUP210,NUP188
17_Member	Reactome Gene Sets	R-HSA-162599	Late Phase of HIV Life Cycle	-2.73731	-0.736982	8/139	5437,5905,6749,6829,7469,8086,23225,23511	POLR2H,RANGAP1,SSRP1,SUPT5H,NELFA,AAAS,NUP210,NUP188
17_Member	Reactome Gene Sets	R-HSA-167238	Pausing and recovery of Tat-mediated HIV elongation	-2.68897	-0.713353	4/34	5437,6749,6829,7469	POLR2H,SSRP1,SUPT5H,NELFA
17_Member	Reactome Gene Sets	R-HSA-167243	Tat-mediated HIV elongation arrest and recovery	-2.68897	-0.713353	4/34	5437,6749,6829,7469	POLR2H,SSRP1,SUPT5H,NELFA
17_Member	Reactome Gene Sets	R-HSA-167287	HIV elongation arrest and recovery	-2.59602	-0.64027	4/36	5437,6749,6829,7469	POLR2H,SSRP1,SUPT5H,NELFA
17_Member	Reactome Gene Sets	R-HSA-167290	Pausing and recovery of HIV elongation	-2.59602	-0.64027	4/36	5437,6749,6829,7469	POLR2H,SSRP1,SUPT5H,NELFA
17_Member	Reactome Gene Sets	R-HSA-6796648	TP53 Regulates Transcription of DNA Repair Genes	-2.41505	-0.524735	5/65	5437,6749,6829,7469,9656	POLR2H,SSRP1,SUPT5H,NELFA,MDC1
17_Member	Reactome Gene Sets	R-HSA-167242	Abortive elongation of HIV-1 transcript in the absence of Tat	-2.24644	-0.424801	3/23	5437,6829,7469	POLR2H,SUPT5H,NELFA
17_Member	Reactome Gene Sets	R-HSA-167169	HIV Transcription Elongation	-2.20785	-0.39772	4/46	5437,6749,6829,7469	POLR2H,SSRP1,SUPT5H,NELFA
17_Member	Reactome Gene Sets	R-HSA-167200	Formation of HIV-1 elongation complex containing HIV-1 Tat	-2.20785	-0.39772	4/46	5437,6749,6829,7469	POLR2H,SSRP1,SUPT5H,NELFA
17_Member	Reactome Gene Sets	R-HSA-167246	Tat-mediated elongation of the HIV-1 transcript	-2.20785	-0.39772	4/46	5437,6749,6829,7469	POLR2H,SSRP1,SUPT5H,NELFA
17_Member	Reactome Gene Sets	R-HSA-167152	Formation of HIV elongation complex in the absence of HIV Tat	-2.14226	-0.359058	4/48	5437,6749,6829,7469	POLR2H,SSRP1,SUPT5H,NELFA
18_Summary	WikiPathways	WP4950	16p11.2 distal deletion syndrome	-3.71186	-1.47576	5/34	930,975,3276,7186,11273,115352	CD19,CD81,PRMT1,TRAF2,ATXN2L,FCRL3
18_Member	WikiPathways	WP4950	16p11.2 distal deletion syndrome	-3.71186	-1.47576	5/34	930,975,3276,7186,11273	CD19,CD81,PRMT1,TRAF2,ATXN2L
18_Member	GO Biological Processes	GO:0050855	regulation of B cell receptor signaling pathway	-2.19357	-0.395891	3/24	930,975,115352	CD19,CD81,FCRL3
19_Summary	GO Biological Processes	GO:0006448	regulation of translational elongation	-3.59327	-1.36854	4/20	16,1801,55337,92715	AARS1,DPH1,SHFL,DPH7
19_Member	GO Biological Processes	GO:0006448	regulation of translational elongation	-3.59327	-1.36854	4/20	16,1801,55337,92715	AARS1,DPH1,SHFL,DPH7
19_Member	GO Biological Processes	GO:1900247	regulation of cytoplasmic translational elongation	-3.21537	-1.06551	3/11	16,1801,92715	AARS1,DPH1,DPH7
20_Summary	GO Biological Processes	GO:0033674	positive regulation of kinase activity	-3.59287	-1.36854	19/473	894,930,975,994,1636,1741,1856,3265,3326,4058,4294,5310,7186,9500,9618,10961,10985,29990,51149,25849,916,3297,7016,7423,10220,11009,142,939,3276,4221,7466,8607,10039,10131,10155,10525,51384,54929,56893,79085	CCND2,CD19,CD81,CDC25B,ACE,DLG3,DVL2,HRAS,HSP90AB1,LTK,MAP3K10,PKD1,TRAF2,MAGED1,TRAF4,ERP29,GCN1,PILRB,MRNIP,PARM1,CD3E,HSF1,TESK1,VEGFB,GDF11,IL24,PARP1,CD27,PRMT1,MEN1,WFS1,RUVBL1,PARP3,TRAP1,TRIM28,HYOU1,WNT16,TMEM161A,UBQLN4,SLC25A23
20_Member	GO Biological Processes	GO:0033674	positive regulation of kinase activity	-3.59287	-1.36854	19/473	894,930,975,994,1636,1741,1856,3265,3326,4058,4294,5310,7186,9500,9618,10961,10985,29990,51149	CCND2,CD19,CD81,CDC25B,ACE,DLG3,DVL2,HRAS,HSP90AB1,LTK,MAP3K10,PKD1,TRAF2,MAGED1,TRAF4,ERP29,GCN1,PILRB,MRNIP
20_Member	GO Biological Processes	GO:0051347	positive regulation of transferase activity	-3.11426	-1.0031	20/559	894,930,975,994,1636,1741,1856,3265,3326,4058,4294,5310,7186,9500,9618,10961,10985,25849,29990,51149	CCND2,CD19,CD81,CDC25B,ACE,DLG3,DVL2,HRAS,HSP90AB1,LTK,MAP3K10,PKD1,TRAF2,MAGED1,TRAF4,ERP29,GCN1,PARM1,PILRB,MRNIP
20_Member	GO Biological Processes	GO:0045860	positive regulation of protein kinase activity	-2.73899	-0.736982	15/393	894,994,1636,1741,1856,3265,3326,4294,5310,7186,9500,9618,10961,29990,51149	CCND2,CDC25B,ACE,DLG3,DVL2,HRAS,HSP90AB1,MAP3K10,PKD1,TRAF2,MAGED1,TRAF4,ERP29,PILRB,MRNIP
20_Member	GO Biological Processes	GO:0001934	positive regulation of protein phosphorylation	-2.48847	-0.574078	22/722	894,916,975,994,1636,1741,1856,3265,3297,3326,4294,5310,7016,7186,7423,9500,9618,10220,10961,11009,29990,51149	CCND2,CD3E,CD81,CDC25B,ACE,DLG3,DVL2,HRAS,HSF1,HSP90AB1,MAP3K10,PKD1,TESK1,TRAF2,VEGFB,MAGED1,TRAF4,GDF11,ERP29,IL24,PILRB,MRNIP
20_Member	GO Biological Processes	GO:0080135	regulation of cellular response to stress	-2.37991	-0.498603	21/692	142,939,3265,3276,3297,4221,4294,7186,7466,8607,9618,10039,10131,10155,10525,10961,51149,51384,54929,56893,79085	PARP1,CD27,HRAS,PRMT1,HSF1,MEN1,MAP3K10,TRAF2,WFS1,RUVBL1,TRAF4,PARP3,TRAP1,TRIM28,HYOU1,ERP29,MRNIP,WNT16,TMEM161A,UBQLN4,SLC25A23
20_Member	GO Biological Processes	GO:0046330	positive regulation of JNK cascade	-2.37179	-0.494143	6/95	939,3265,4294,7186,9618,51384	CD27,HRAS,MAP3K10,TRAF2,TRAF4,WNT16
20_Member	GO Biological Processes	GO:0032874	positive regulation of stress-activated MAPK cascade	-2.28223	-0.442137	7/131	939,3265,3276,4294,7186,9618,51384	CD27,HRAS,PRMT1,MAP3K10,TRAF2,TRAF4,WNT16
20_Member	GO Biological Processes	GO:0070304	positive regulation of stress-activated protein kinase signaling cascade	-2.24679	-0.424801	7/133	939,3265,3276,4294,7186,9618,51384	CD27,HRAS,PRMT1,MAP3K10,TRAF2,TRAF4,WNT16
20_Member	GO Biological Processes	GO:0071902	positive regulation of protein serine/threonine kinase activity	-2.18378	-0.388546	9/208	894,1856,3265,3326,4294,5310,7186,9500,10961	CCND2,DVL2,HRAS,HSP90AB1,MAP3K10,PKD1,TRAF2,MAGED1,ERP29
20_Member	GO Biological Processes	GO:0046328	regulation of JNK cascade	-2.12825	-0.347413	7/140	939,3265,4221,4294,7186,9618,51384	CD27,HRAS,MEN1,MAP3K10,TRAF2,TRAF4,WNT16
